# Supplementary material
Source: publisher figshare collection journal article supplement (https://karger.figshare.com/articles/dataset/_/11671407)

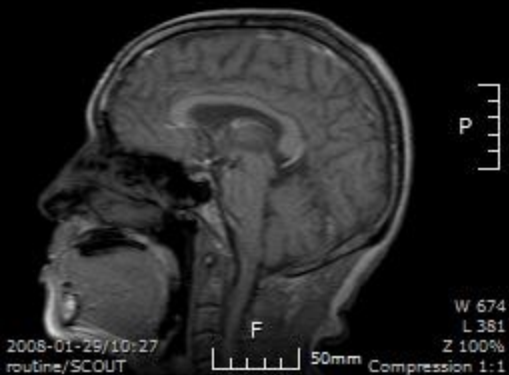

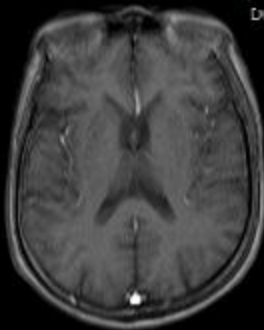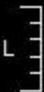

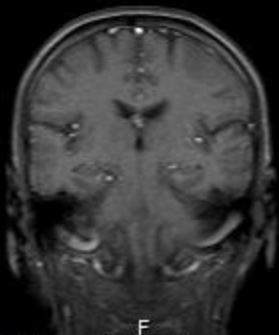

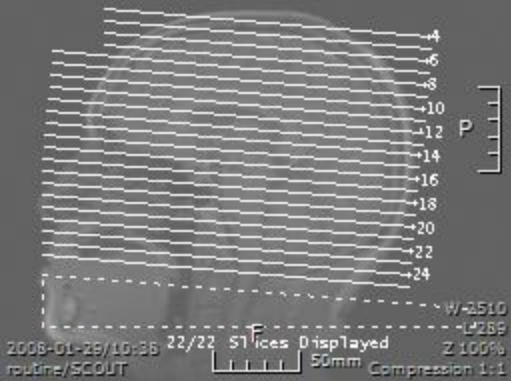





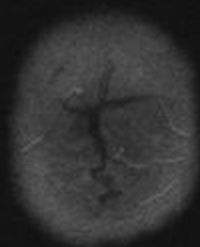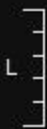

PF

W 1972

L 860

Z 100%

2008-01-29/10:31

routine/tse7\_t2\_tra\_SNUH

50mm

Compression 1:1

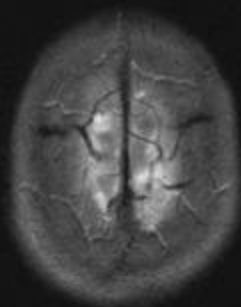

PF

W 1972

L 860

Z 100%

2008-01-29/10:31

routine/tse7\_t2\_tra\_SNUH

50mm

Compression 1:1

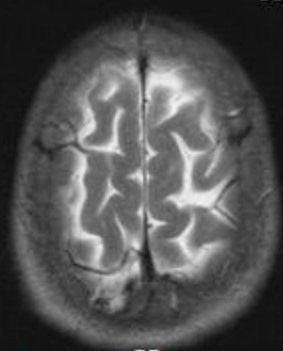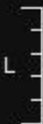

PF

W 1972

L 860

Z 100%

2008-01-29/10:31

routine/tse7\_t2\_tra\_SNUH

50mm

Compression 1:1

Id: 0 Supplement 4-2 20080129-MRI BORAMAE HOSP.  
MAGNETOM EXPERT 2008-01-29  
MR  
Se 2  
Im 7  
DOB: [REDACTED]

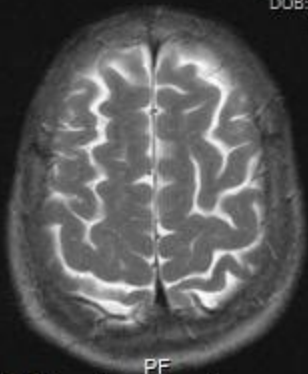

2008-01-29/10:31

routine/tse7\_t2\_tra\_SNUH

PF

50mm

W 1972

L 860

Z 100%

Compression 1:1

Idx 0 Supplement 4-2 20080129-MRI BORAMAE HOSP.  
MAGNETOM EXPERT 2008-01-29  
MR  
Se 2  
Im 8  
DOB:

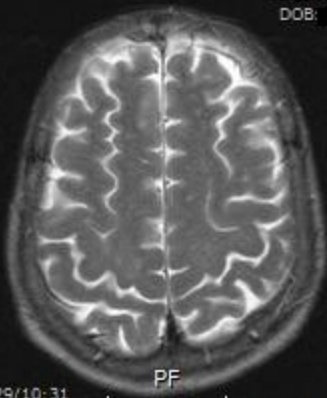

2008-01-29/10:31

routine/tse7\_t2\_tra\_SNUH

PF

50mm

W 1972

L 860

Z 100%

Compression 1:1

Se 2  
Im 9

DOE

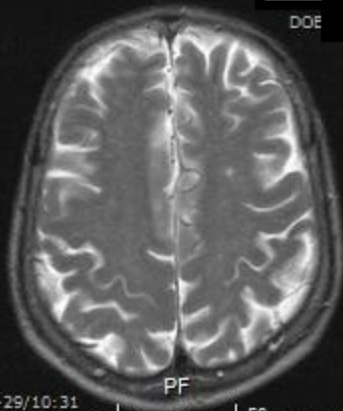

W 1972  
L 860  
Z 100%  
Compression 1:1

2008-01-29/10:31

routine/tse7\_t2\_tra\_SNUH

50mm

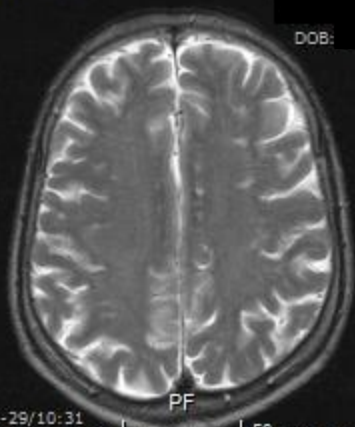

W 1972

L 860

Z 100%

2008-01-29/10:31

routine/tse7\_t2\_tra\_SNUH

50mm

Compression 1:1

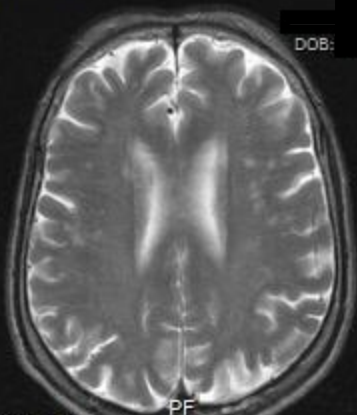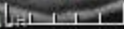

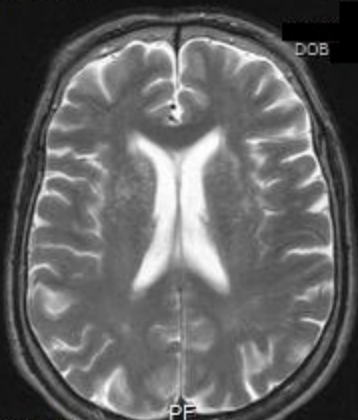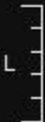

PF

W 1972

L 860

Z 100%

2008-01-29/10:31

routine/tse7\_t2\_tra\_SNUH

50mm

Compression 1:1

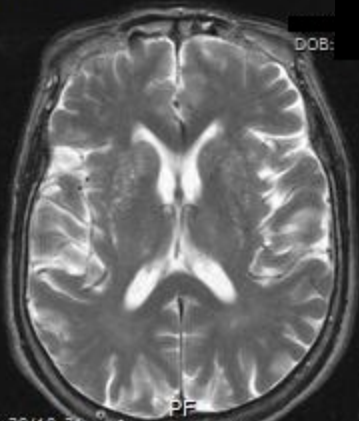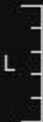

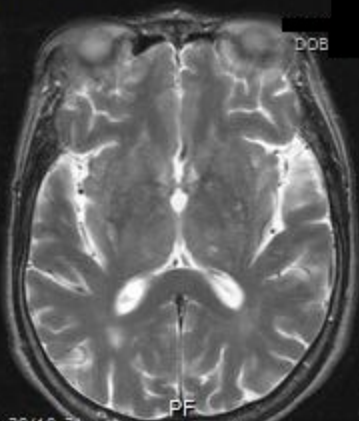

Se 2  
Im 15

DOB

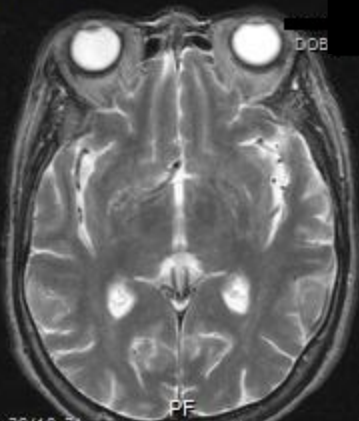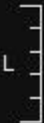

2008-01-29/10:31

routine/tse7\_t2\_tra\_SNUH

PF

50mm

W 1972

L 860

Z 100%

Compression 1:1



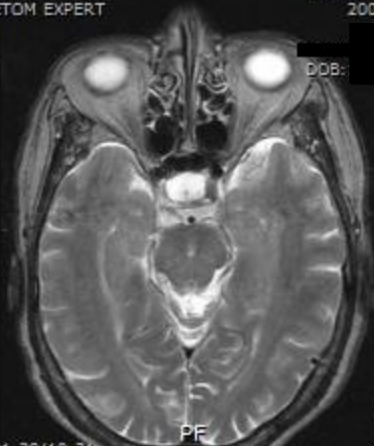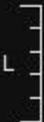

PF

W 1972

L 860

Z 100%

2008-01-29/10:31

routine/tse7\_t2\_tra\_SNUH

50mm

Compression 1:1

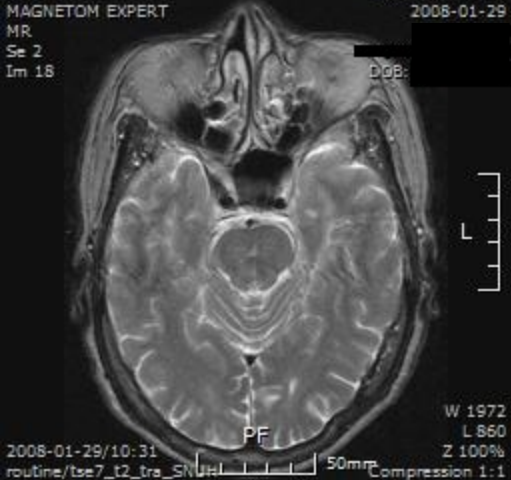

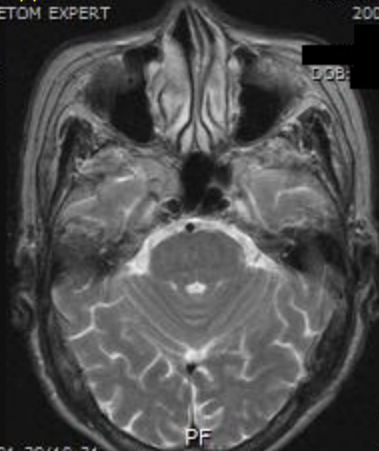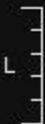

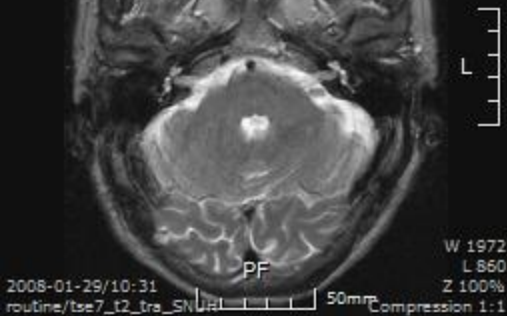

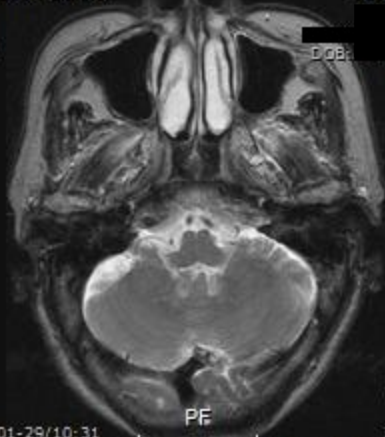

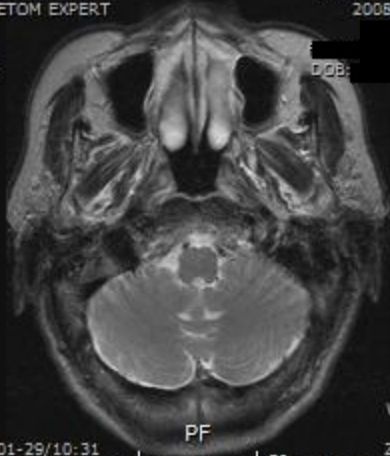

W 1972

L 860

Z 100%

2008-01-29/10:31

routine/tse7\_t2\_tra\_SNUH

50mm

Compression 1:1

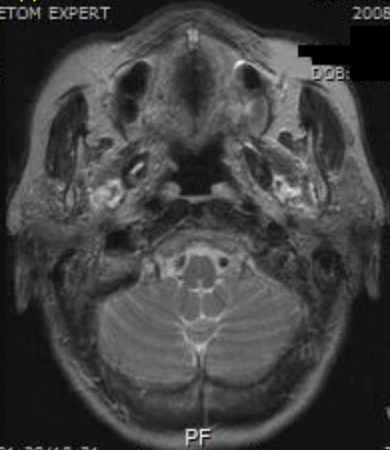

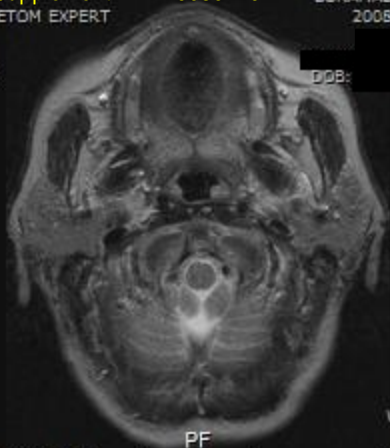

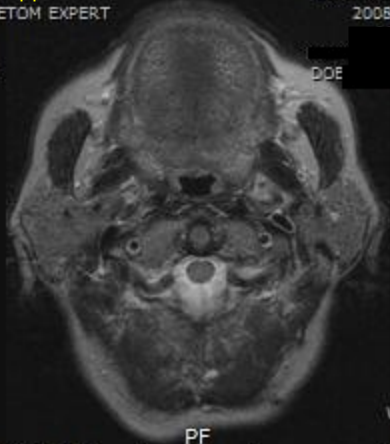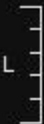

PF

W 1972

L 860

Z 100%

2008-01-29/10:31

routine/tse7\_t2\_tra\_SNUH

50mm

Compression 1:1

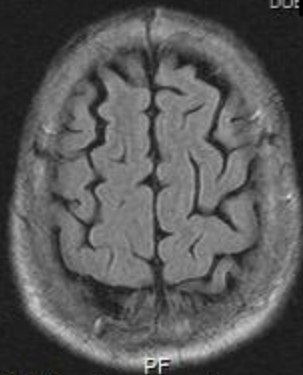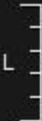

PF

W 1200  
L 481  
Z 100%  
Compression 1:1

2008-01-29/10:35

routine/tirm\_tra\_SNUH

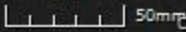

50mm

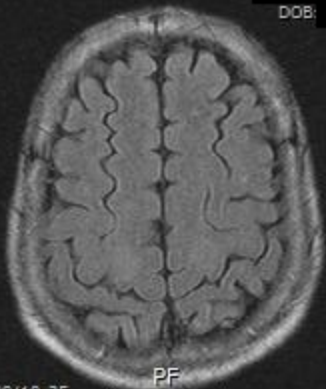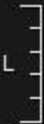

PF

W 1200

L 481

Z 100%

2008-01-29/10:35

routine/tirm\_tra\_SNUH

50mm

Compression 1:1

Idx 0 Supplement 4 - 2 20080129 - MRI BORAMAE HOSP.  
MAGNETOM EXPERT 2008-01-29  
MR  
Se 3  
Im 28  
DOB: [REDACTED]

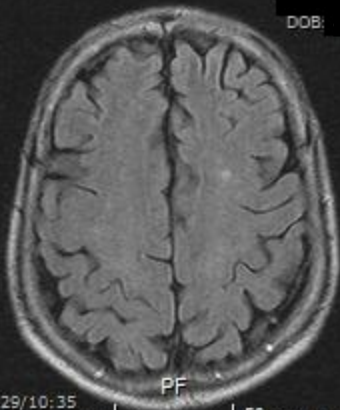

2008-01-29/10:35  
routine/tirm\_tra\_SNUH

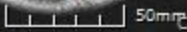

W 1200  
L 481  
Z 100%  
Compression 1:1

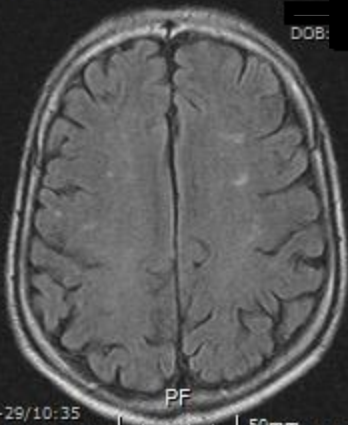

2008-01-29/10:35

routine/tirm\_tra\_SNUH

W 1200

L 481

Z 100%

Compression 1:1

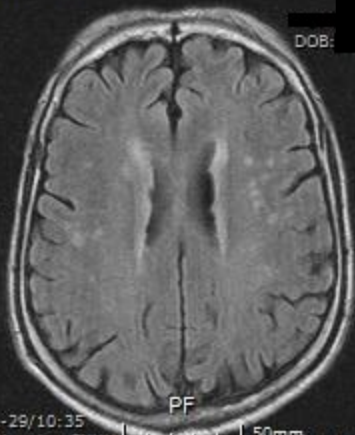

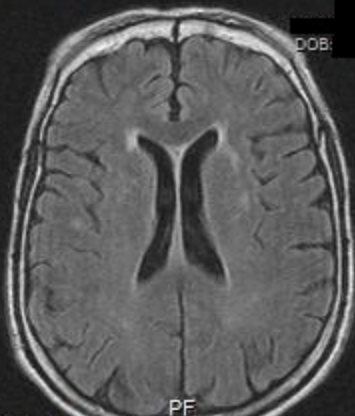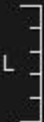

PF

W 1200

L 481

Z 100%

2008-01-29/10:35

routine/tirm\_tra\_SNUH

50mm

Compression 1:1

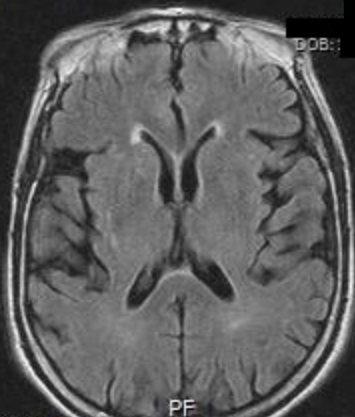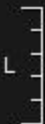

PF

W 1200

L 481

Z 100%

2008-01-29/10:35

routine/tirm\_tra\_SNUH

50mm

Compression 1:1

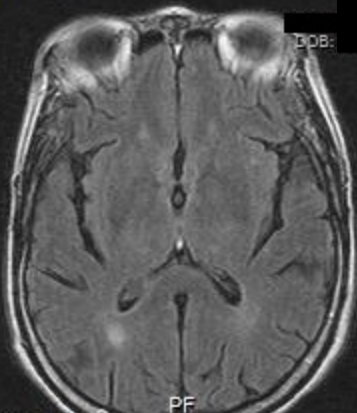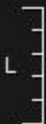

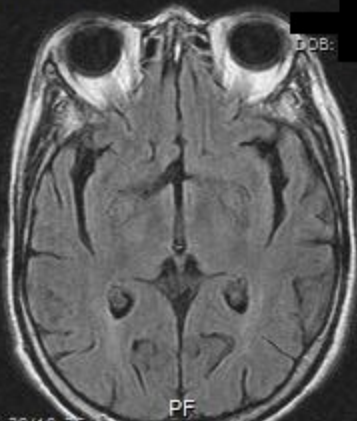

PF

W 1200

L 481

Z 100%

2008-01-29/10:35

routine/tirm\_tra\_SNUH

50mm

Compression 1:1

MAGNETOM EXPERT

MR

Se 3

Im 35

2008-01-29

DOB: [REDACTED]

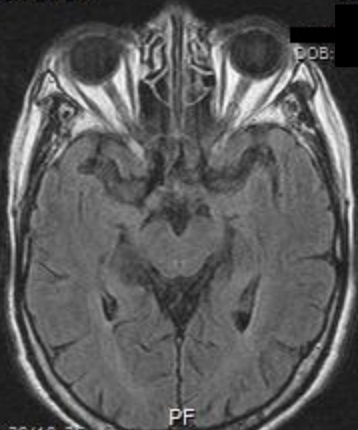

2008-01-29/10:35

routine/t1m\_tra\_SNUH

PF

50mm

W 1200

L 481

Z 100%

Compression 1:1

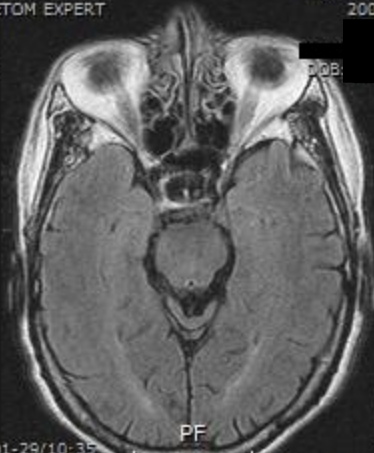

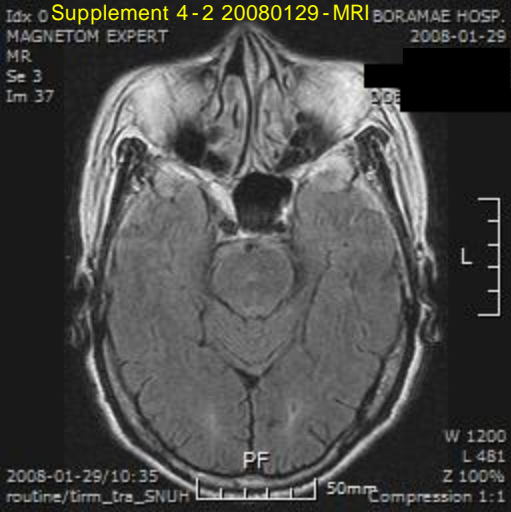

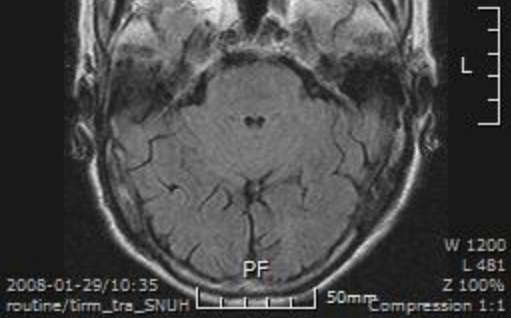

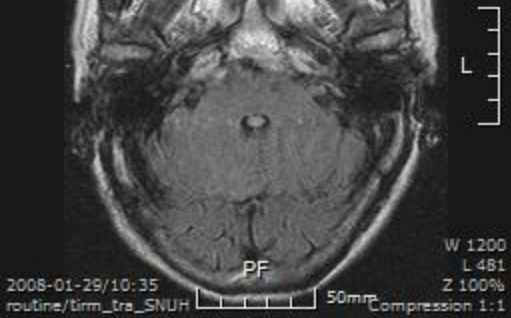

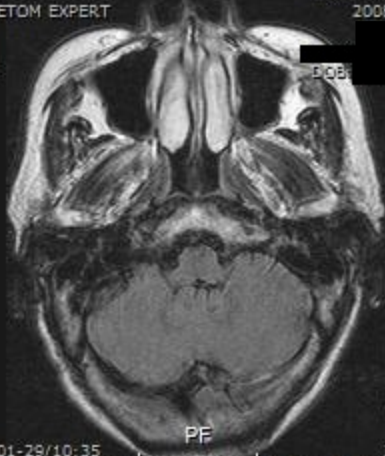

PF

W 1200

L 481

Z 100%

2008-01-29/10:35

routine/tirm\_tra\_SNUH

50mm

Compression 1:1

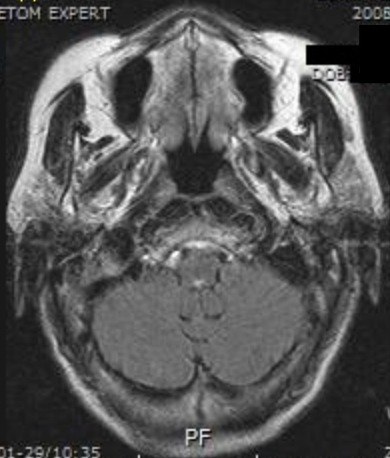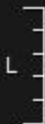

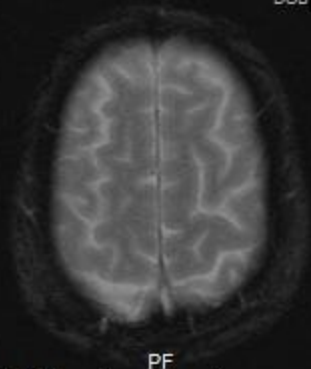

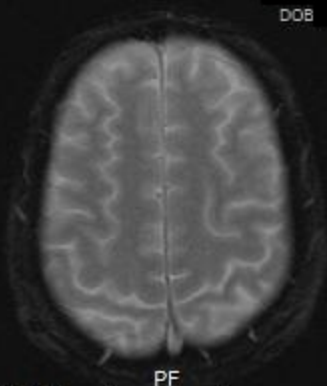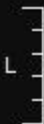

PF

W 1338

L 594

Z 100%

2008-01-29/10:38

routine/fl2d\_hemo\_tra\_SNUH

50mm

Compression 1:1

Idx 0 Supplement 4 - 2 20080129 - MRI BORAMAE HOSP.  
MAGNETOM EXPERT 2008-01-29  
MR  
Se 4  
Im 44

DOB:

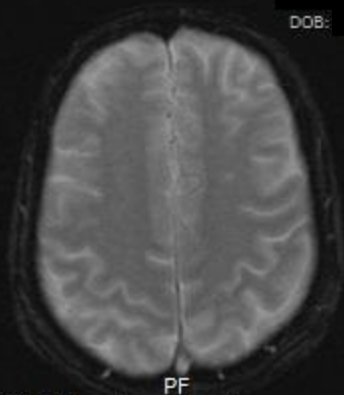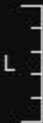

2008-01-29/10:38

routine/fl2d\_hemo\_tra\_SNUH

PF

50mm

W 1338

L 594

Z 100%

Compression 1:1

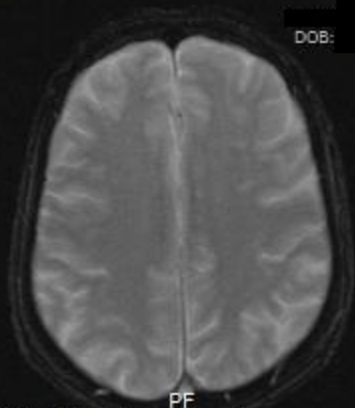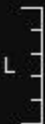

PF

W 1338

L 594

Z 100%

2008-01-29/10:38

routine/fl2d\_hemo\_tra\_SNUH

50mm

Compression 1:1

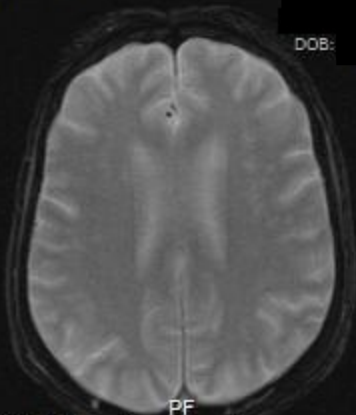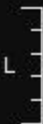

PF

W 1338

L 594

Z 100%

2008-01-29/10:38

routine/fl2d\_hemo\_tra\_SNUH

50mm

Compression 1:1

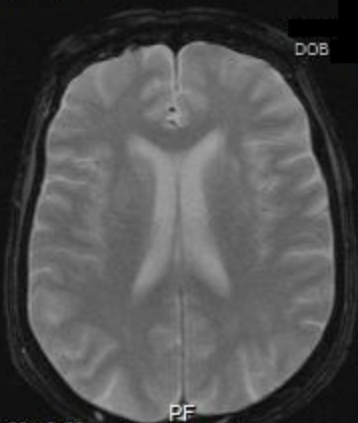

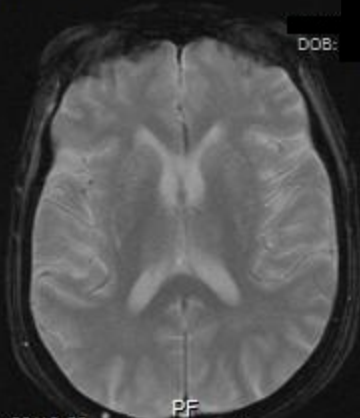

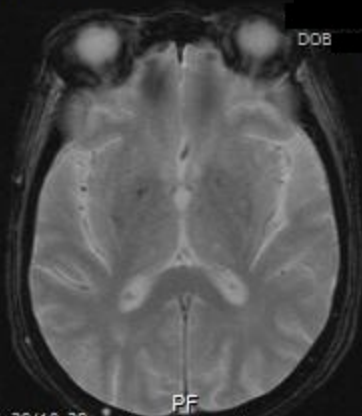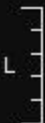

PF

W 1338

L 594

Z 100%

2008-01-29/10:38

routine/fl2d\_hemo\_tra\_SNUH

50mm

Compression 1:1

Se 4  
Im 50

DOB:

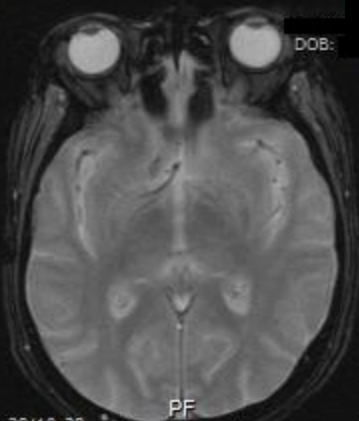

2008-01-29/10:38

routine/fl2d\_hemo\_tra\_SNUH

PF

50mm

W 1338

L 594

Z 100%

Compression 1:1

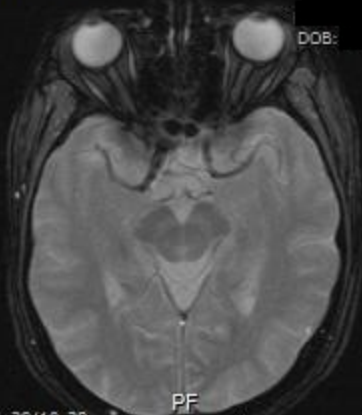

PF

W 1338

L 594

Z 100%

2008-01-29/10:38

routine/fl2d\_hemo\_tra\_SNUH

50mm

Compression 1:1

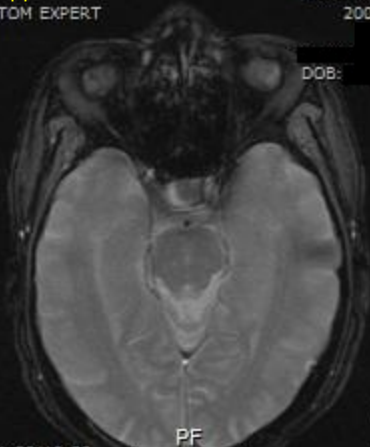

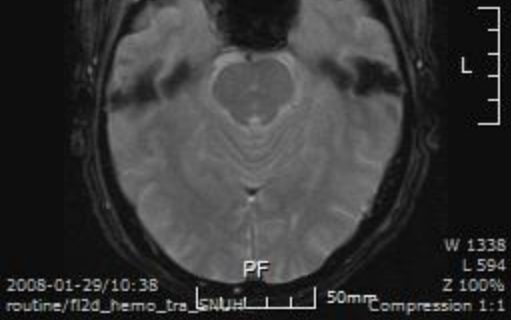



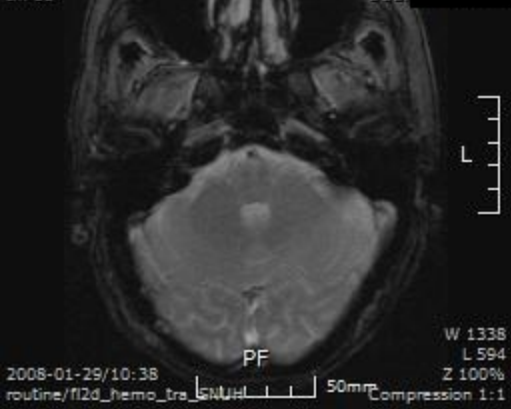

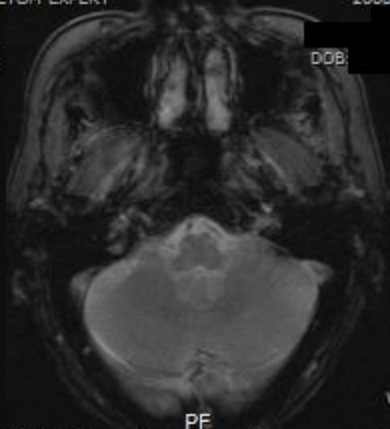

PF

W 1338

L 594

Z 100%

2008-01-29/10:38

routine/fl2d\_hemo\_tra\_SNUH

50mm

Compression 1:1

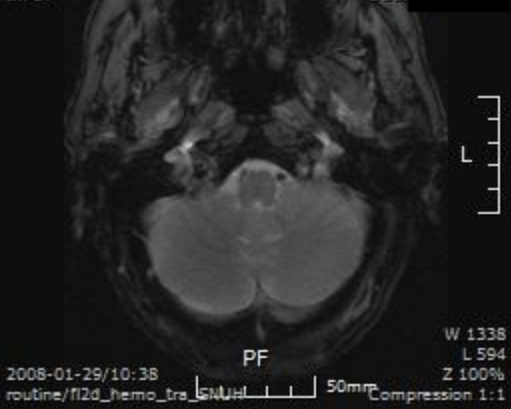

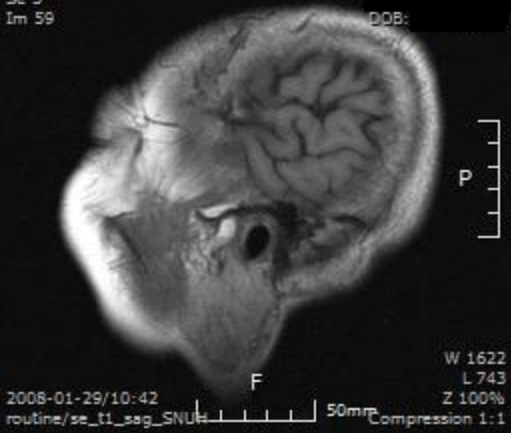

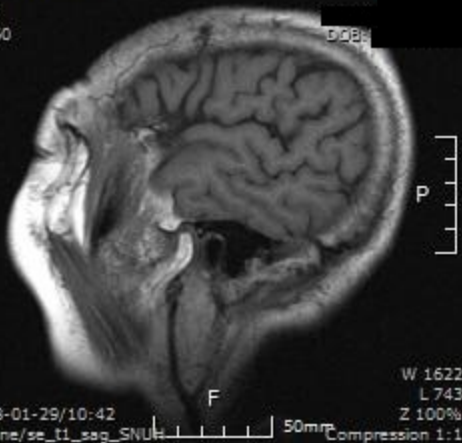

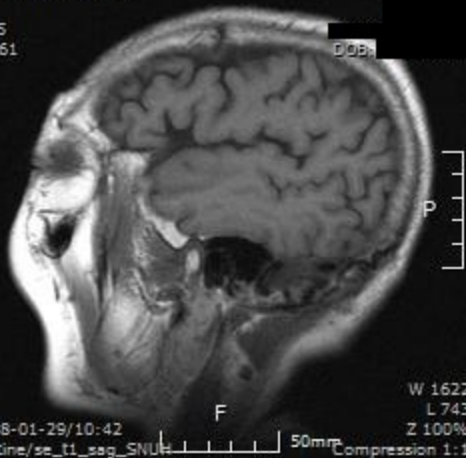

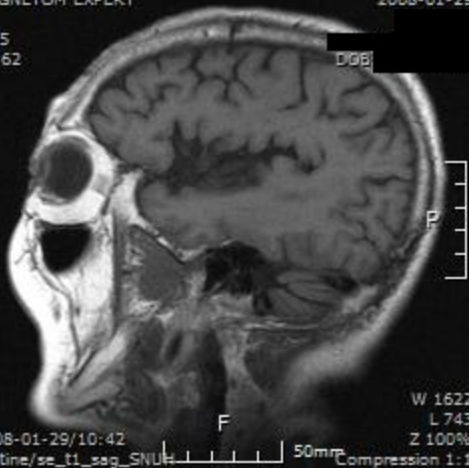

W 1622

L 743

Z 100%

2008-01-29/10:42

routine/se\_t1\_sag\_SNUH

50mm

Compression 1:1

Idx 0 Supplement 4-2 20080129-MRI BORAMAE HOSP.  
MAGNETOM EXPERT 2008-01-29  
MR  
Se 5  
Im 63

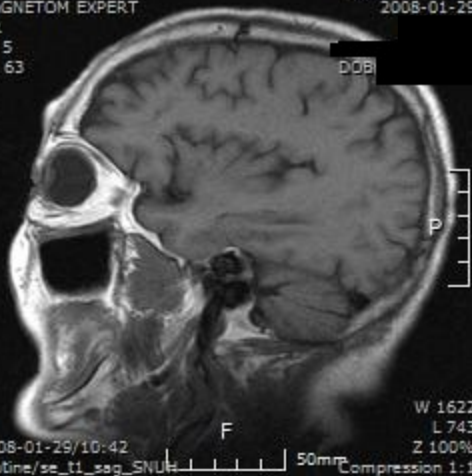

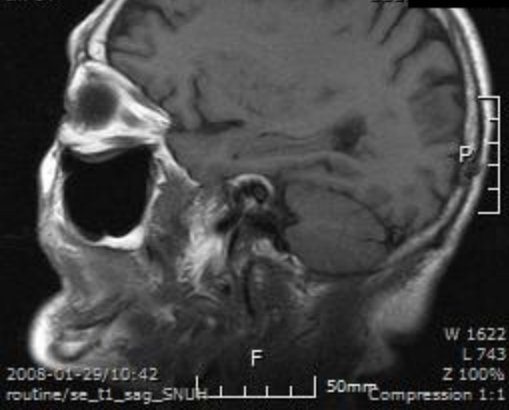

Idx 0 Supplement 4 - 2 20080129 - MRI BORAMAE HOSP.  
MAGNETOM EXPERT 2008-01-29  
MR  
Se 5  
Im 65

DOB: [REDACTED]

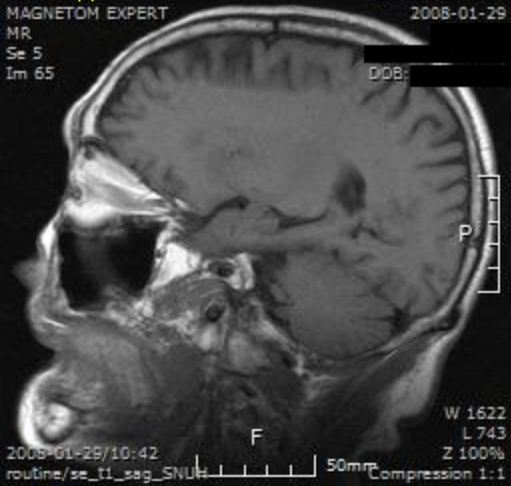

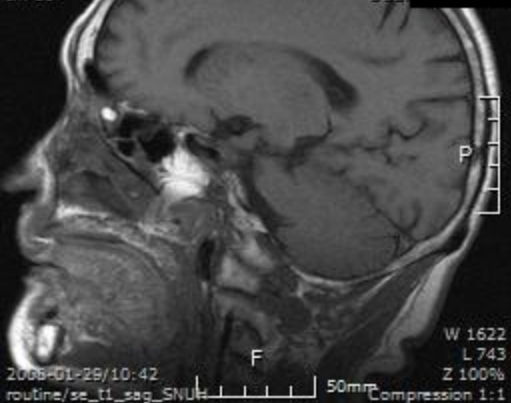

Idx 0 Supplement 4-2 20080129-MRI BORAMAE HOSP.  
MAGNETOM EXPERT 2008-01-29  
MR  
Se 5  
Im 67

DOB: [REDACTED]

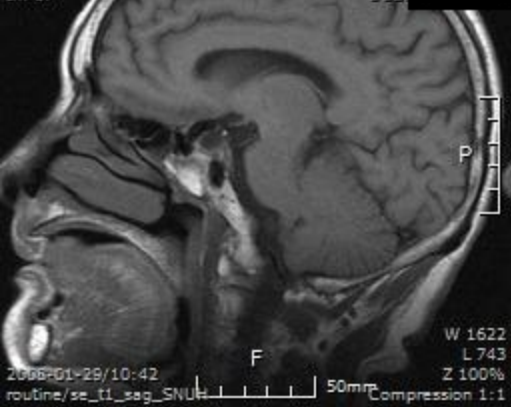

Idx 0 Supplement 4-2 20080129-MRI BORAMAE HOSP.  
MAGNETOM EXPERT 2008-01-29  
MR  
Se 5  
Im 68

DOB: [REDACTED]

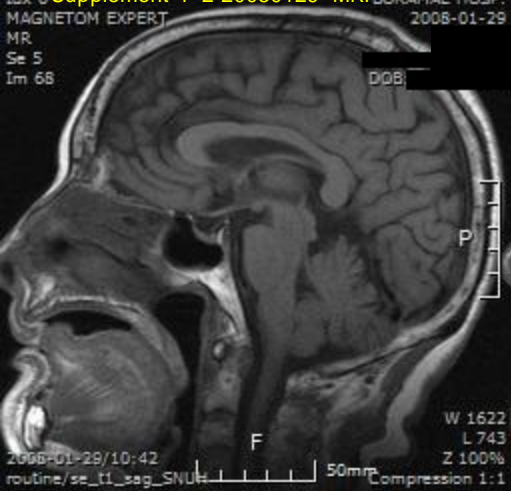

2008-01-29/10:42

routine/se\_t1\_sag\_SNUH

50mm

Compression 1:1

Idx 0 Supplement 4-2 20080129-MRI BORAMAE HOSP.  
MAGNETOM EXPERT 2008-01-29  
MR  
Se 5  
Im 69

DOB: [REDACTED]

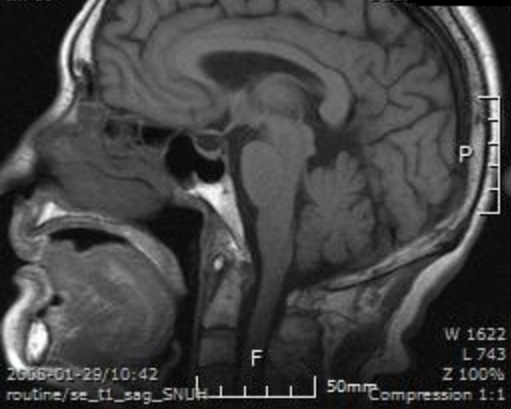

Idx 0 Supplement 4-2 20080129-MRI BORAMAE HOSP.  
MAGNETOM EXPERT 2008-01-29  
MR  
Se 5  
Im 70

DOB: [REDACTED]

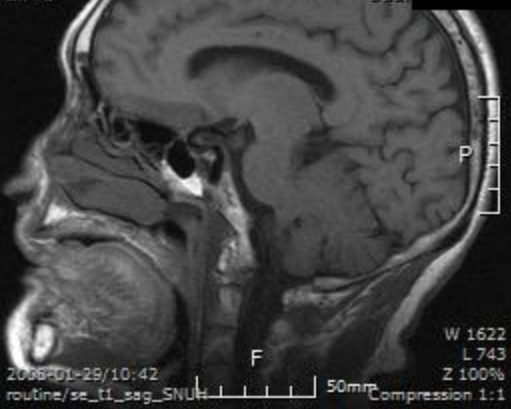

Idx 0 Supplement 4-2 20080129-MRI BORAMAE HOSP.  
MAGNETOM EXPERT 2008-01-29  
MR  
Se 5  
Im 71

DOB [REDACTED]

P

F

W 1622

L 743

Z 100%

2008-01-29/10:42

routine/se\_t1\_sag\_SNUH

50mm

Compression 1:1

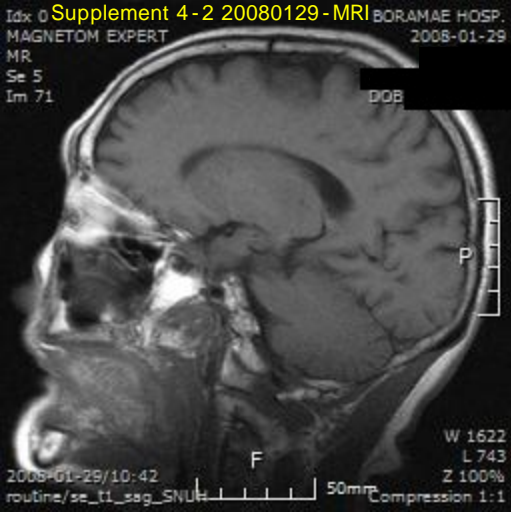

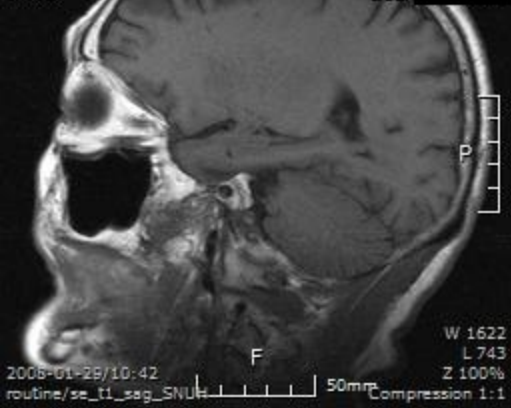

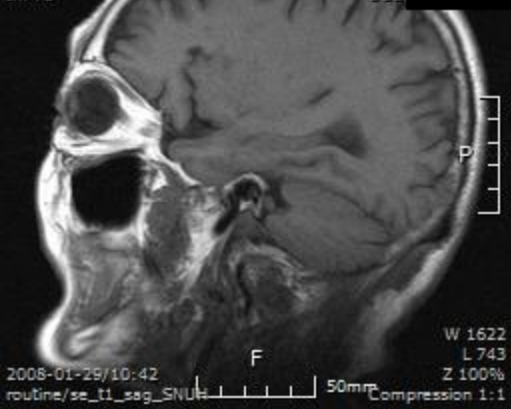

Idx 0 Supplement 4-2 20080129-MRI BORAMAE HOSP.  
MAGNETOM EXPERT 2008-01-29  
MR  
Se 5  
Im 74

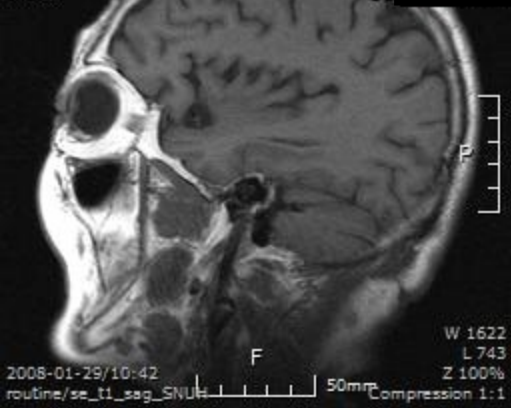

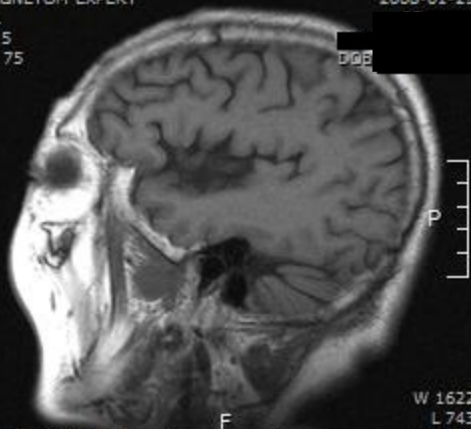

Idx 0 Supplement 4 - 2 20080129 - MRI BORAMAE HOSP.  
MAGNETOM EXPERT 2008-01-29  
MR  
Se 5  
Im 76

DOB

P

F

W 1622

L 743

Z 100%

2008-01-29/10:42

routine/se\_t1\_sag\_SNUH

50mm

Compression 1:1

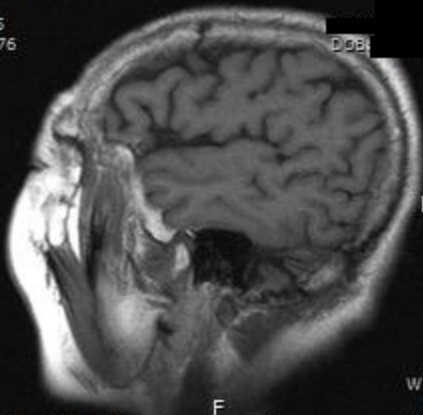

Idx 0 Supplement 4-2 20080129-MRI BORAMAE HOSP.  
MAGNETOM EXPERT 2008-01-29  
MR  
Se 5  
Im 77

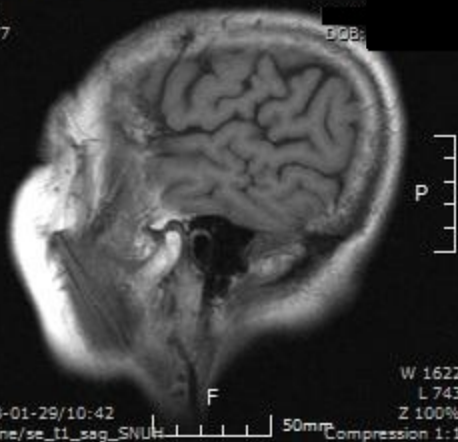

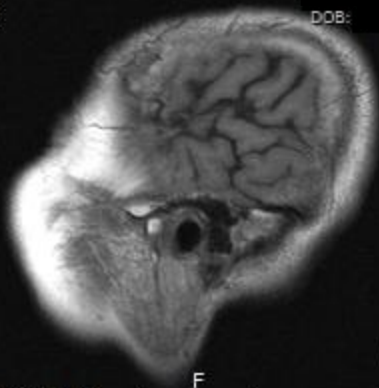

P

F

W 1622

L 743

Z 100%

2008-01-29/10:42

routine/se\_t1\_sag\_SNUH

50mm

Compression 1:1

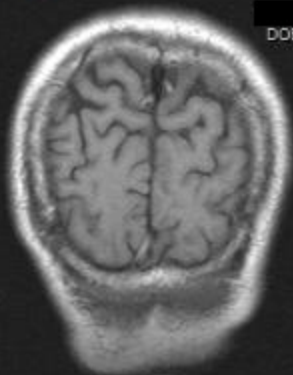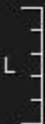

AF

W 1478

L 574

Z 100%

2008-01-29/10:45

routine/se\_t1\_cor\_SNUH

50mm

Compression 1:1

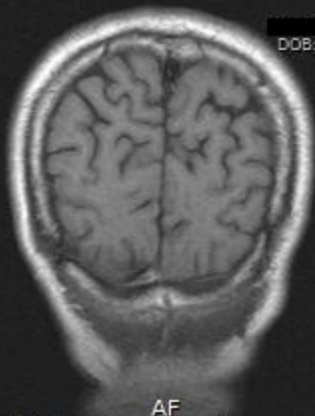

Idx 0 Supplement 4-2 20080129-MRI BORAMAE HOSP.  
MAGNETOM EXPERT 2008-01-29  
MR  
Se 6  
Im 81

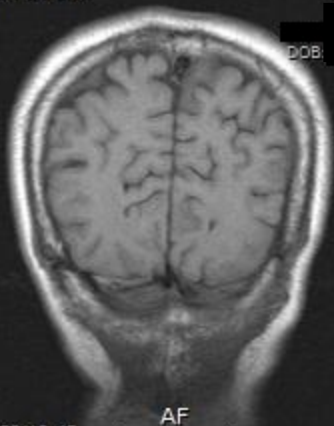

2008-01-29/10:45

routine/se\_t1\_cor\_SNUH

AF

50mm

W 1478

L 574

Z 100%

Compression 1:1

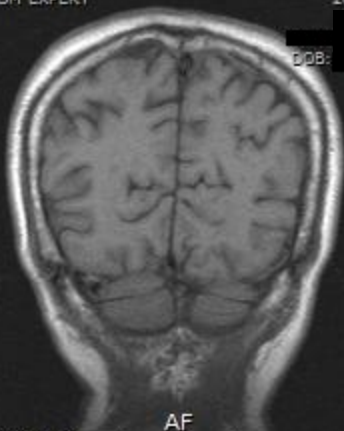

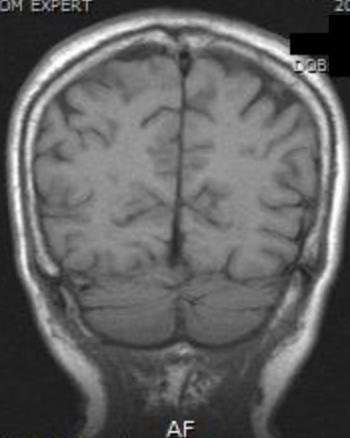

Idx 0 Supplement 4-2 20080129-MRI BORAMAE HOSP.  
MAGNETOM EXPERT 2008-01-29  
MR  
Se 6  
Im 84

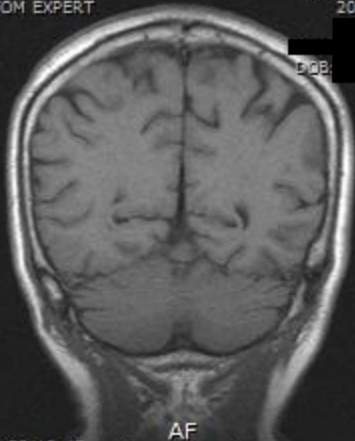

2008-01-29/10:45

routine/se\_t1\_cor\_SNUH

AF

50mm

W 1478

L 574

Z 100%

Compression 1:1

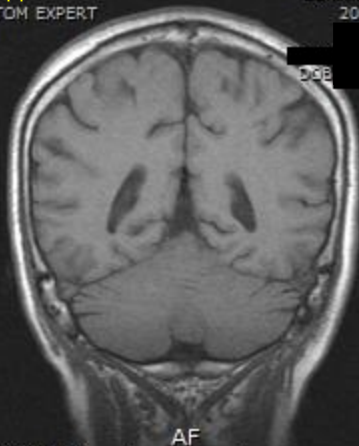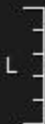

AF

W 1478

L 574

Z 100%

Compression 1:1

2008-01-29/10:45

routine/se\_t1\_cor\_SNUH

50mm

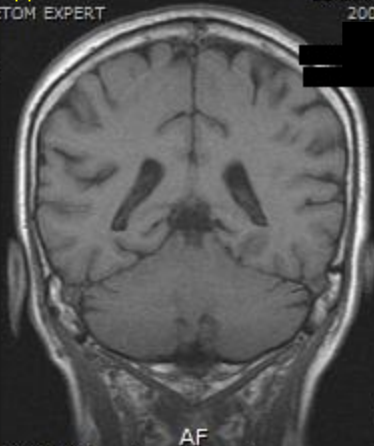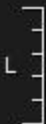

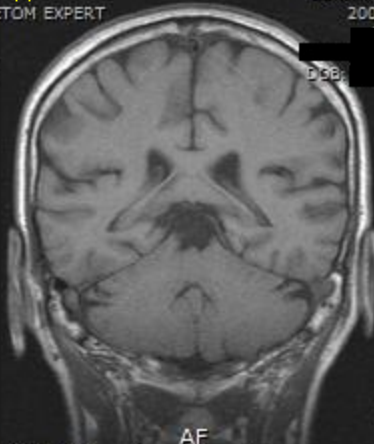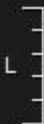

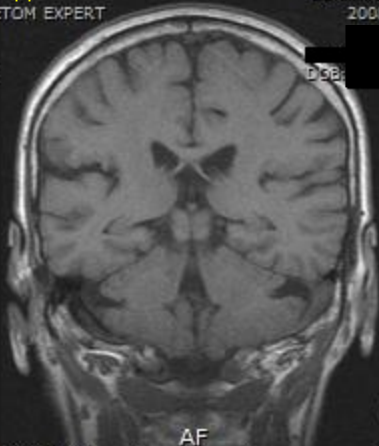

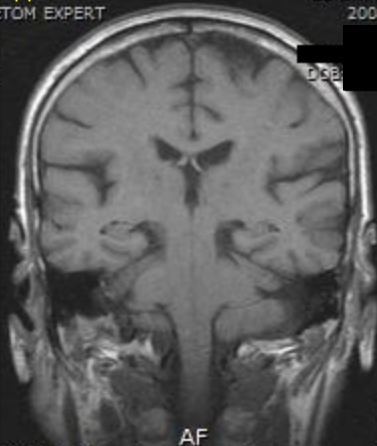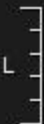

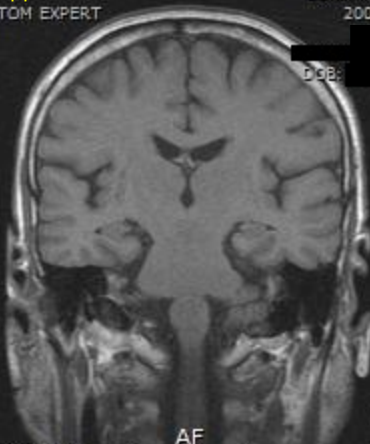

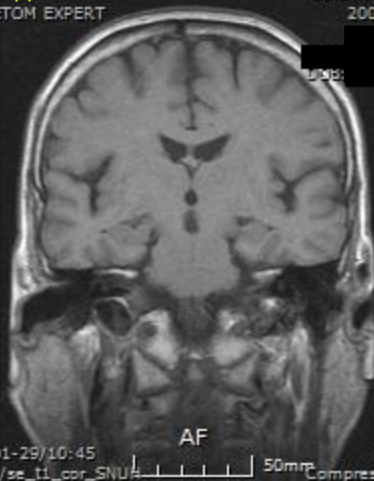

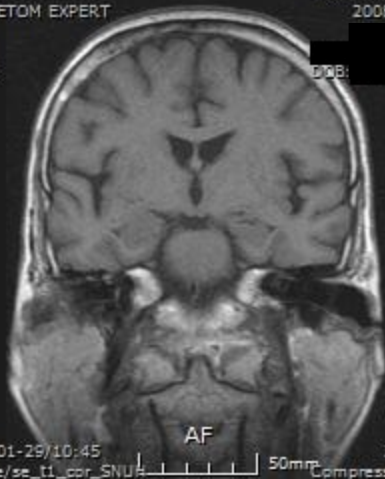

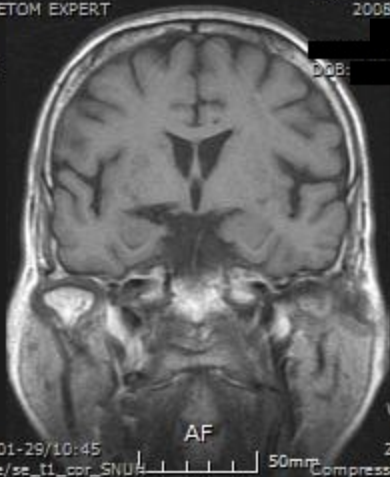

W 1478

L 574

Z 100%

2008-01-29/10:45

routine/se\_t1\_cor\_SNUH

AF

50mm

Compression 1:1

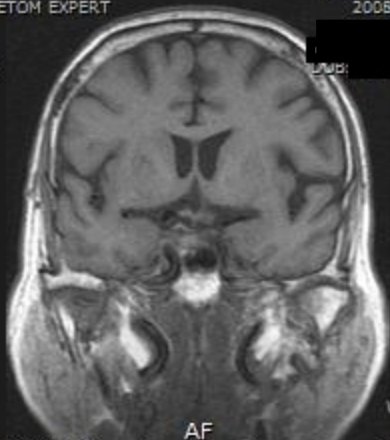

Idx 0 Supplement 4 - 2 20080129 - MRI BORAMAE HOSP.  
MAGNETOM EXPERT 2008-01-29  
MR  
Se 6  
Im 95

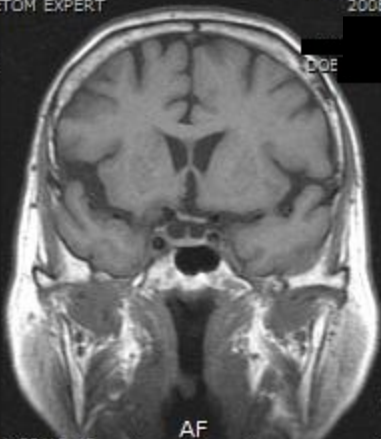

2008-01-29/10:45

routine/se\_t1\_cor\_SNUH

AF

50mm

W 1478

L 574

Z 100%

Compression 1:1

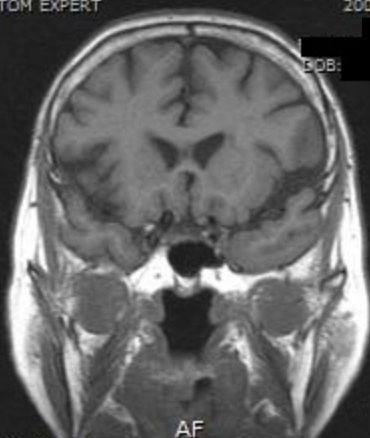

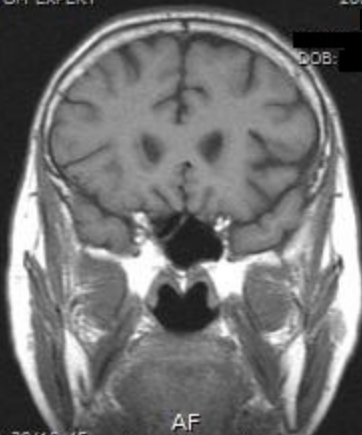

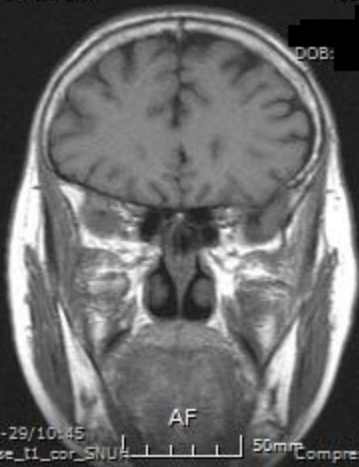

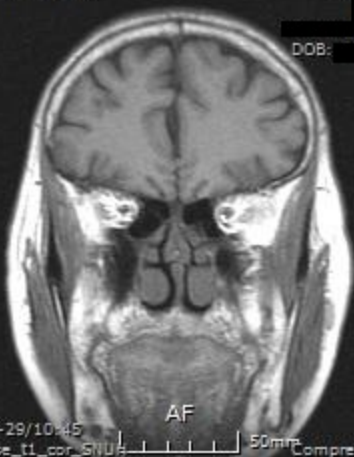

Se 6  
Im 100

DOB: [REDACTED]

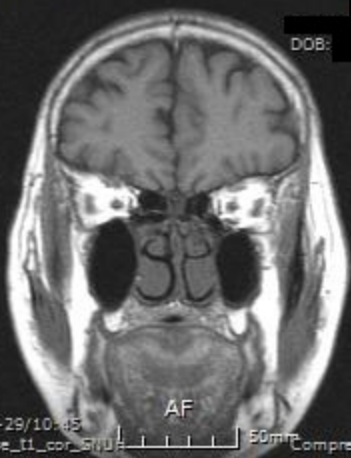

2008-01-29/10:45

routine/se\_t1\_cor\_500

AF

50mm

W 1478

L 574

Z 100%

Compression 1:1

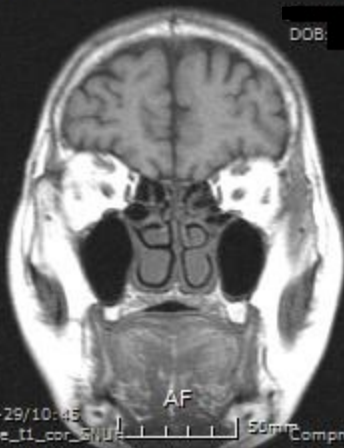

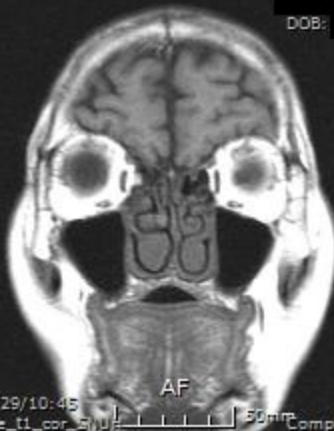

Supplement: Supplementary file 7 [file 1]
