# Supplementary material
Source: publisher figshare collection journal article supplement (https://karger.figshare.com/articles/dataset/_/11671407)

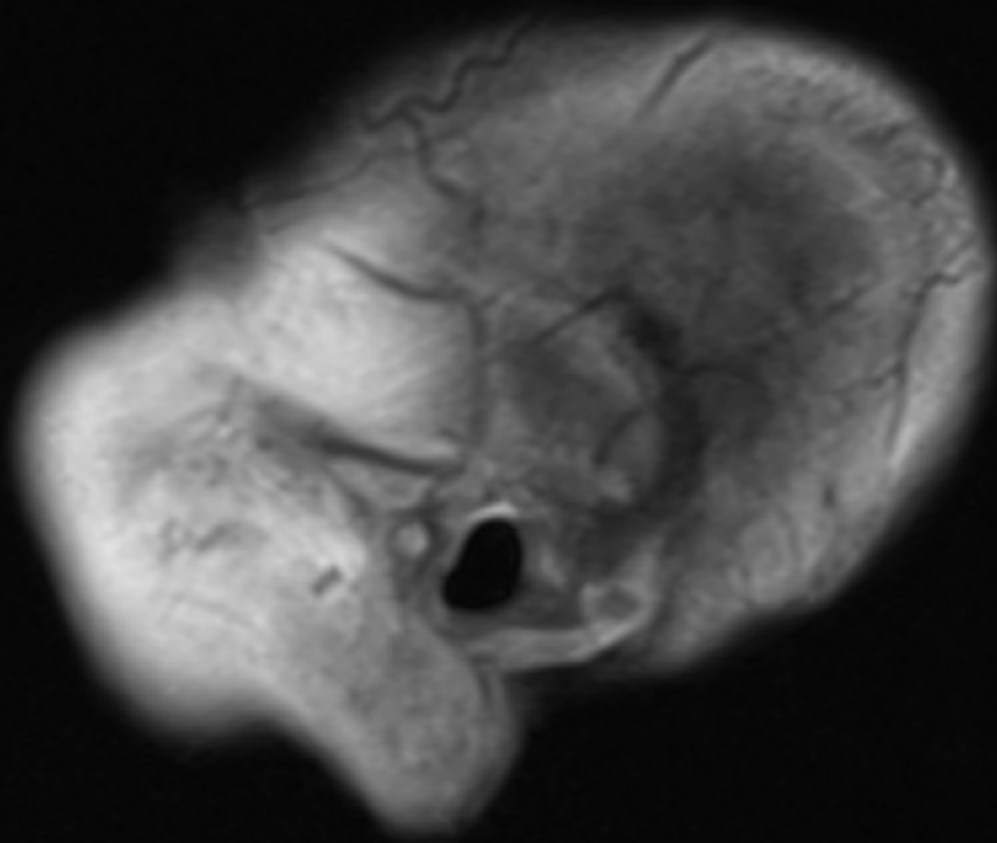

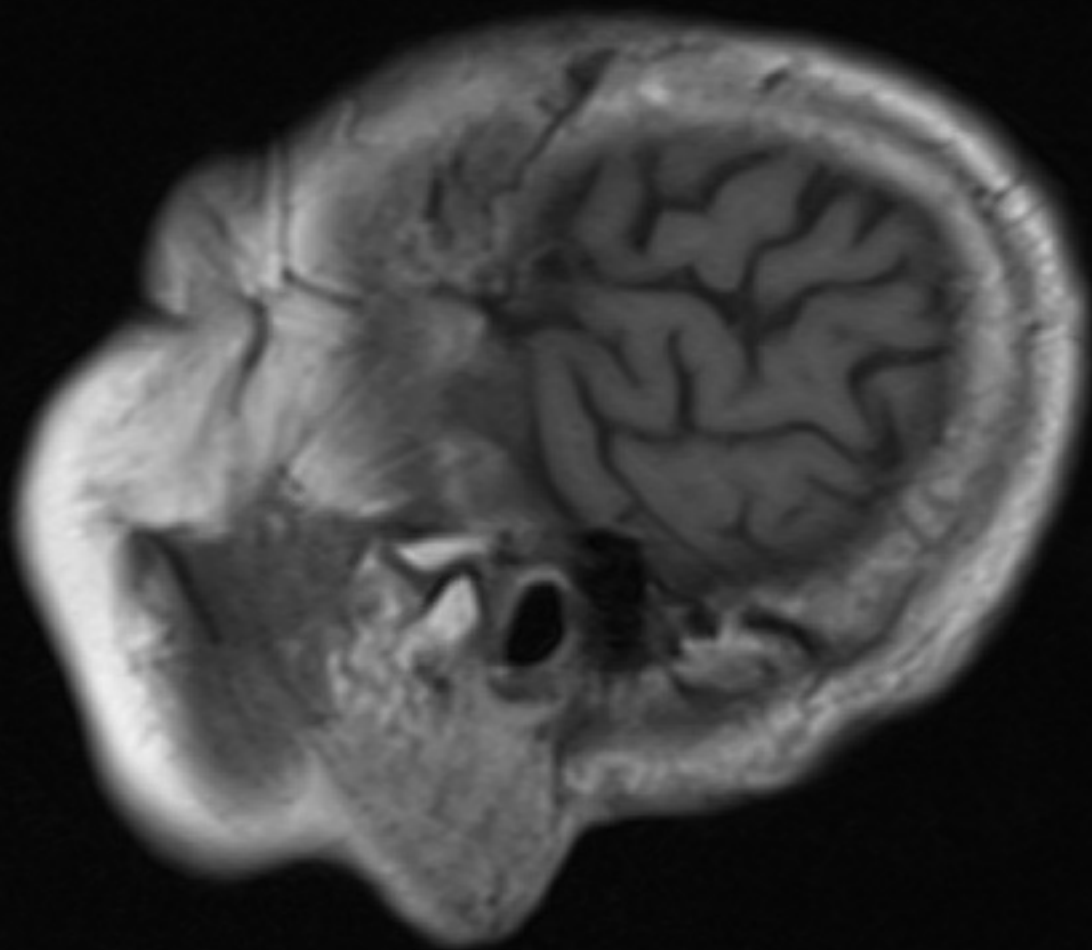

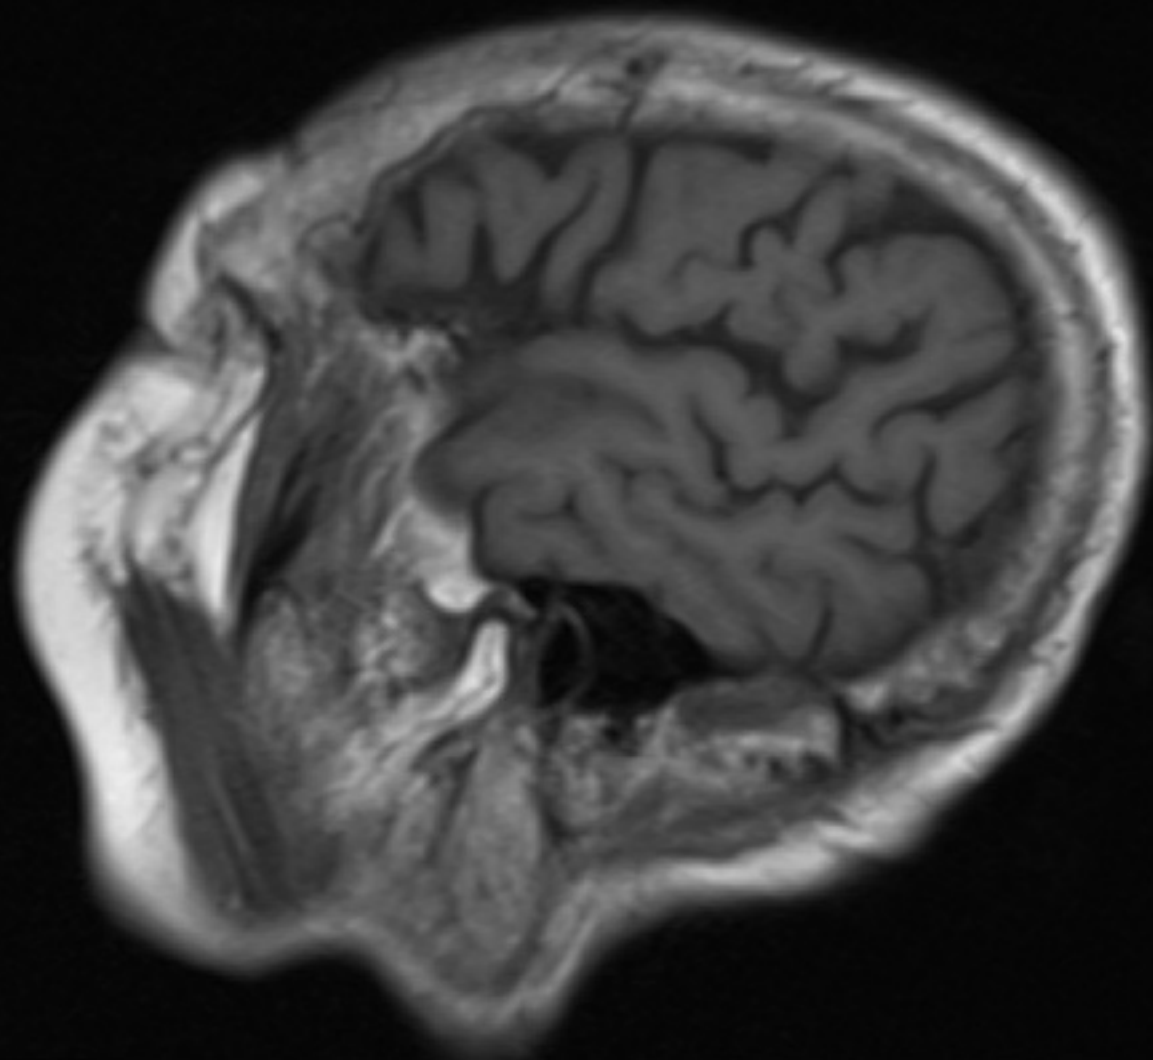

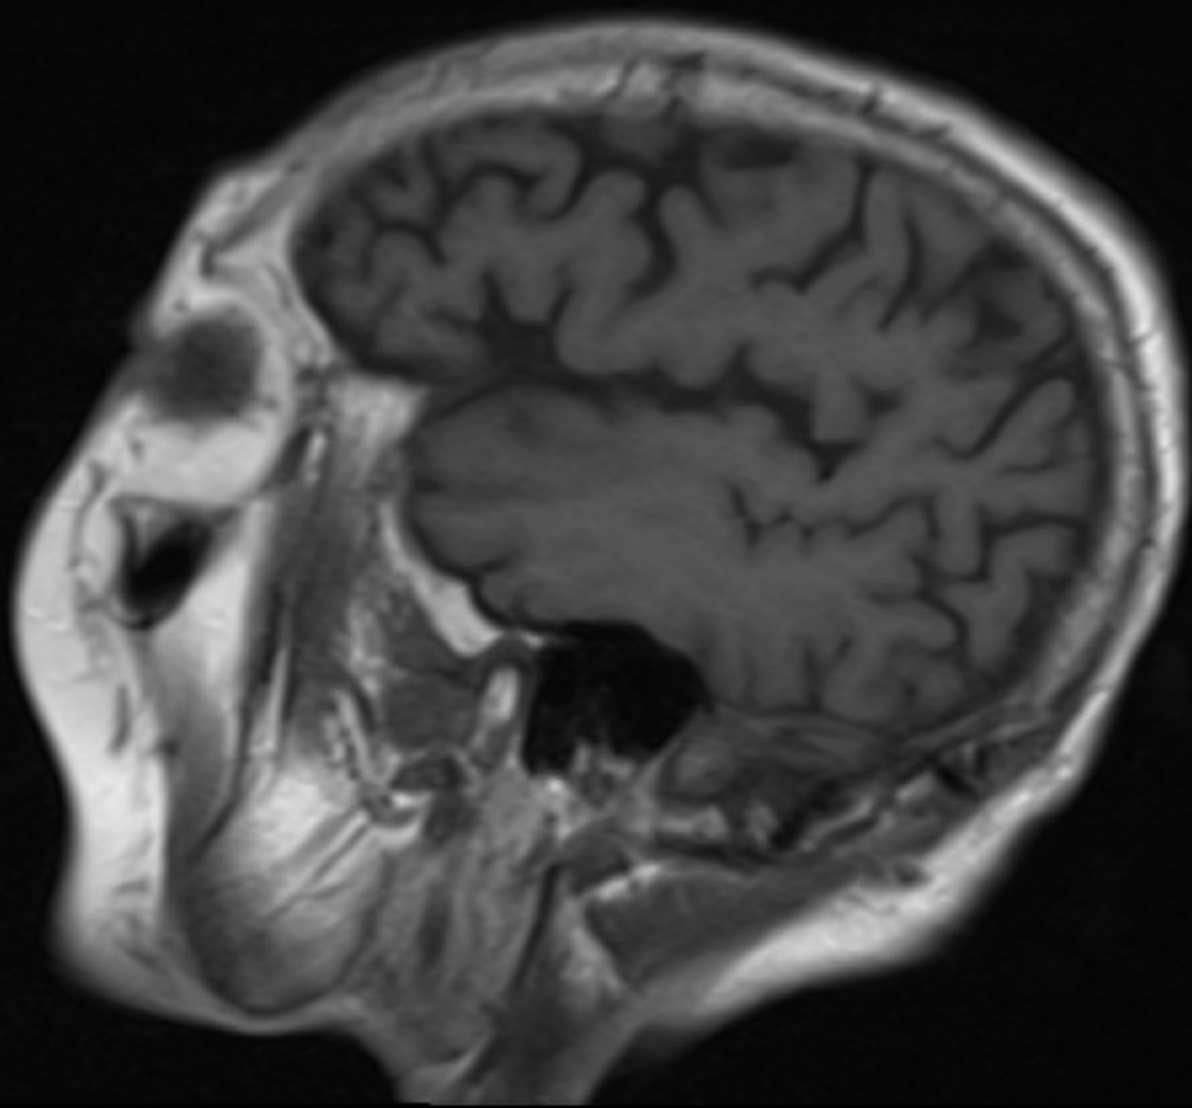

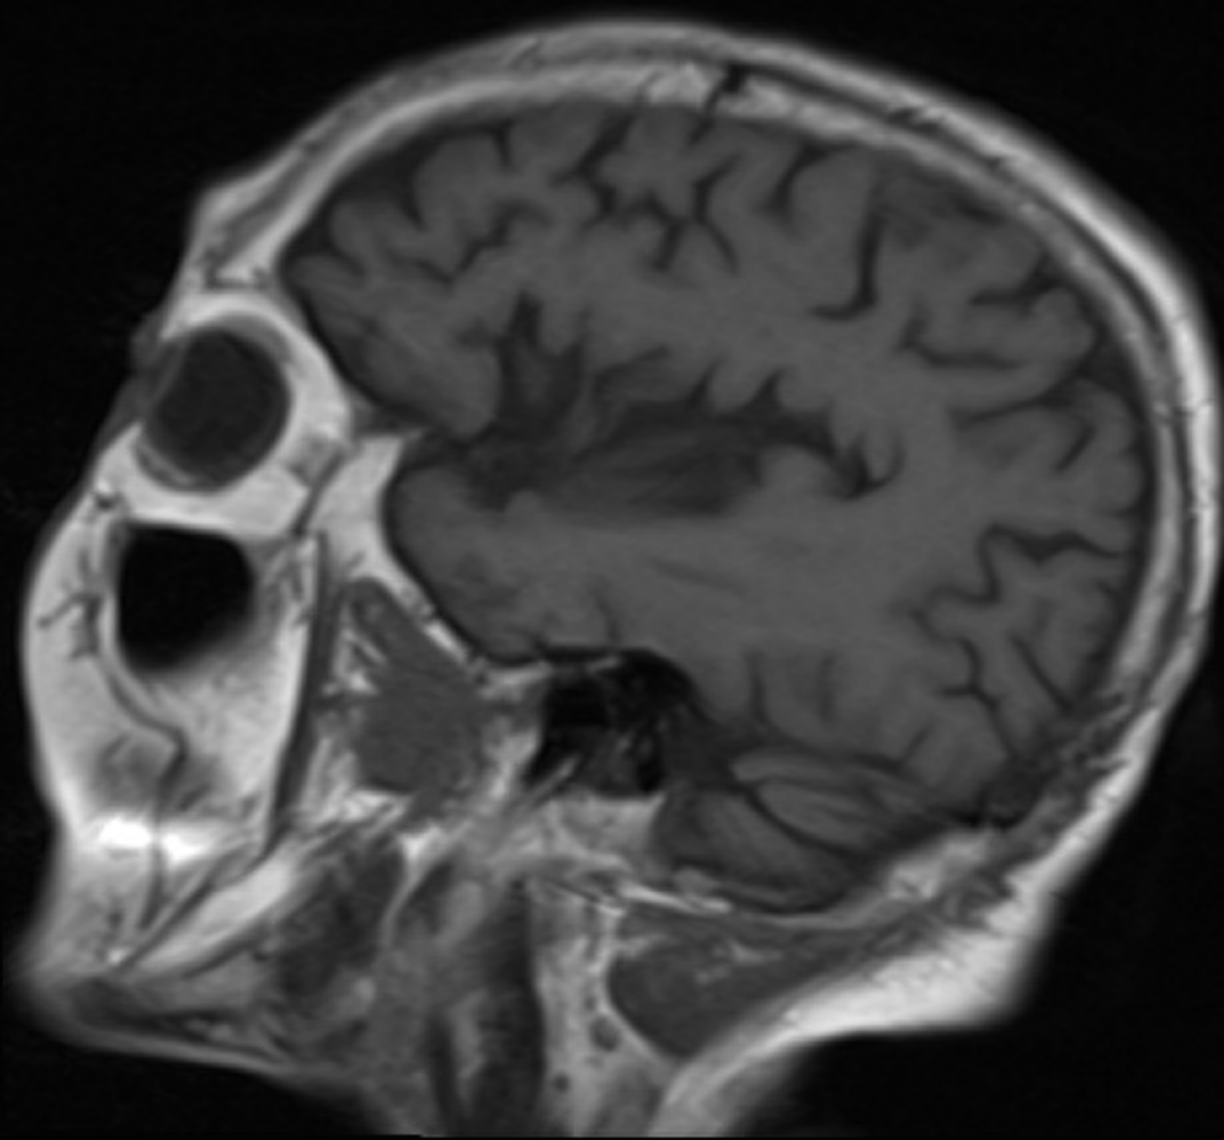

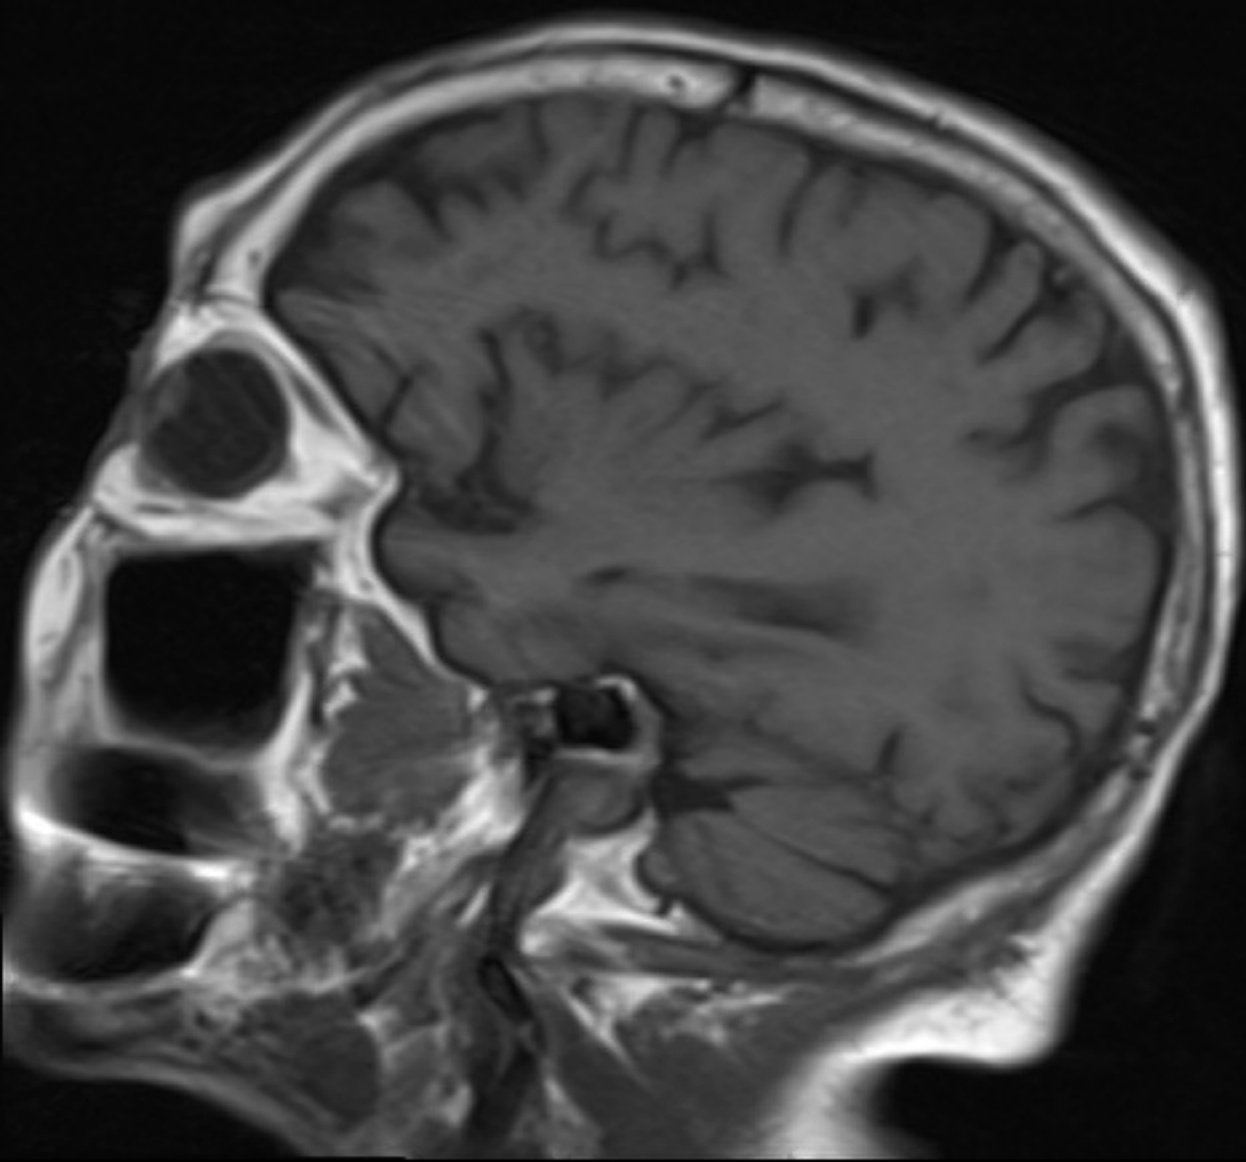

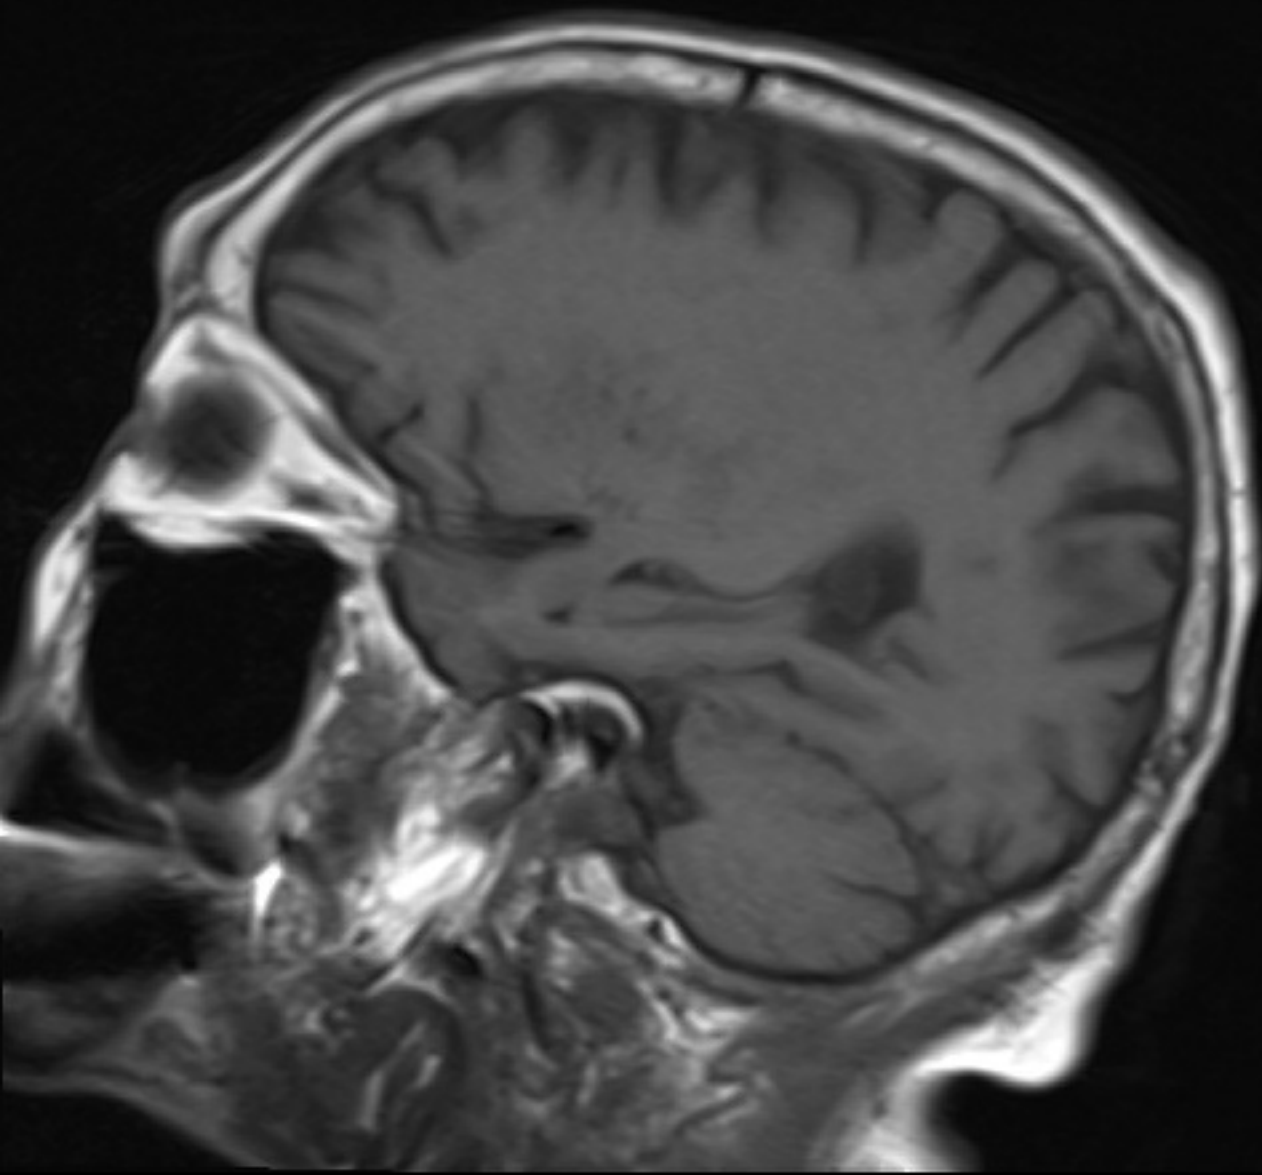

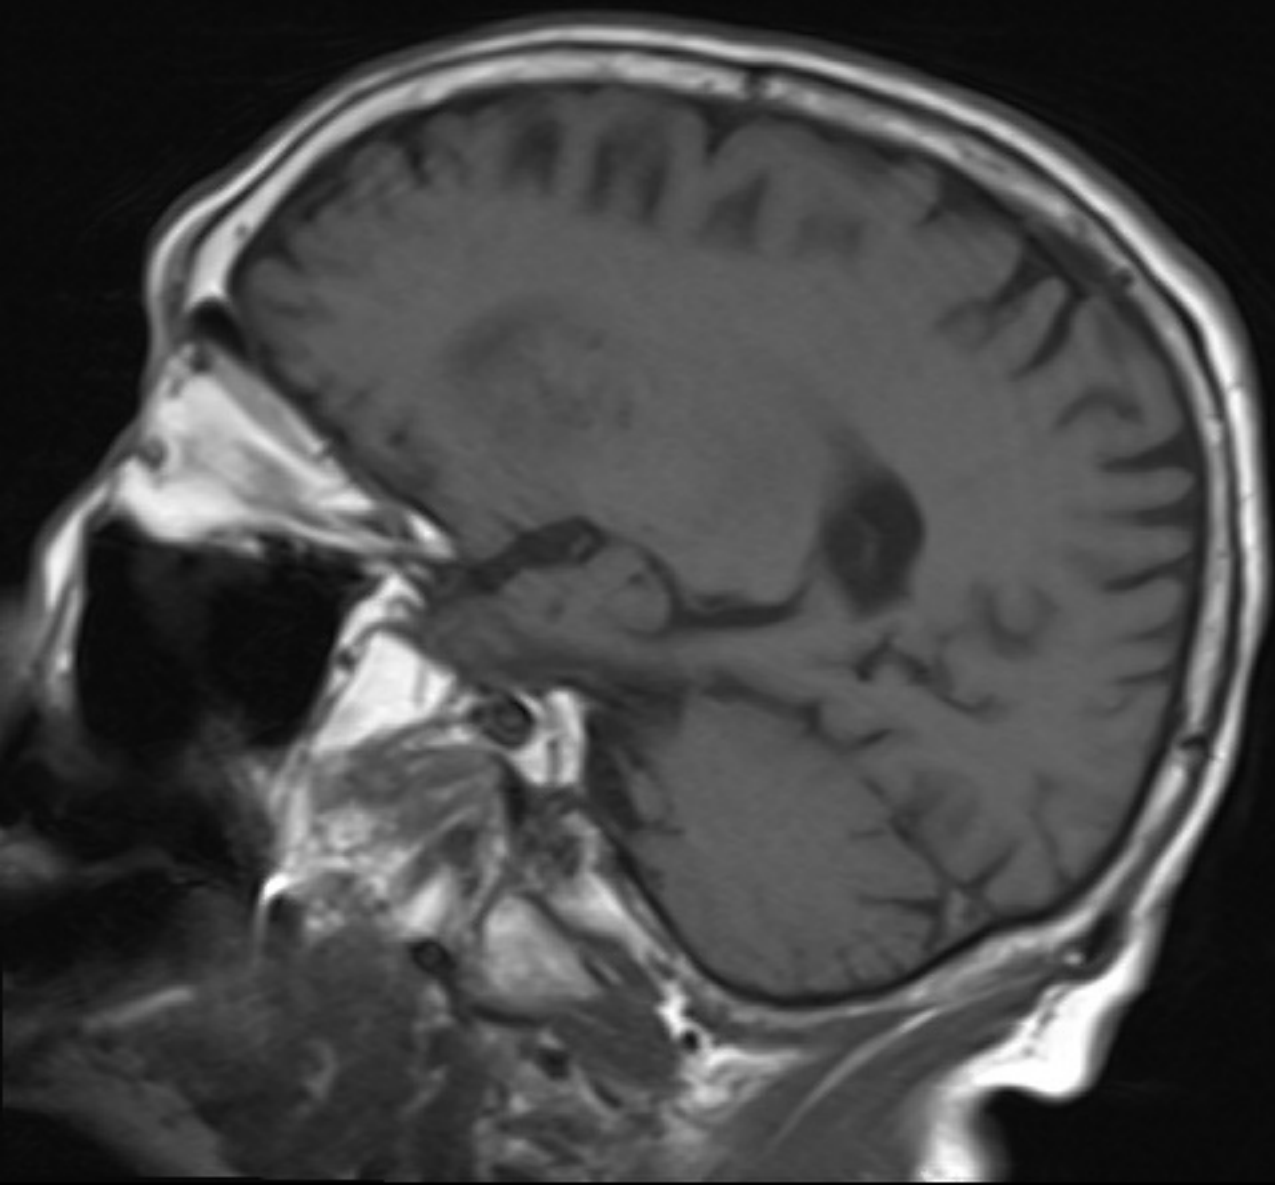



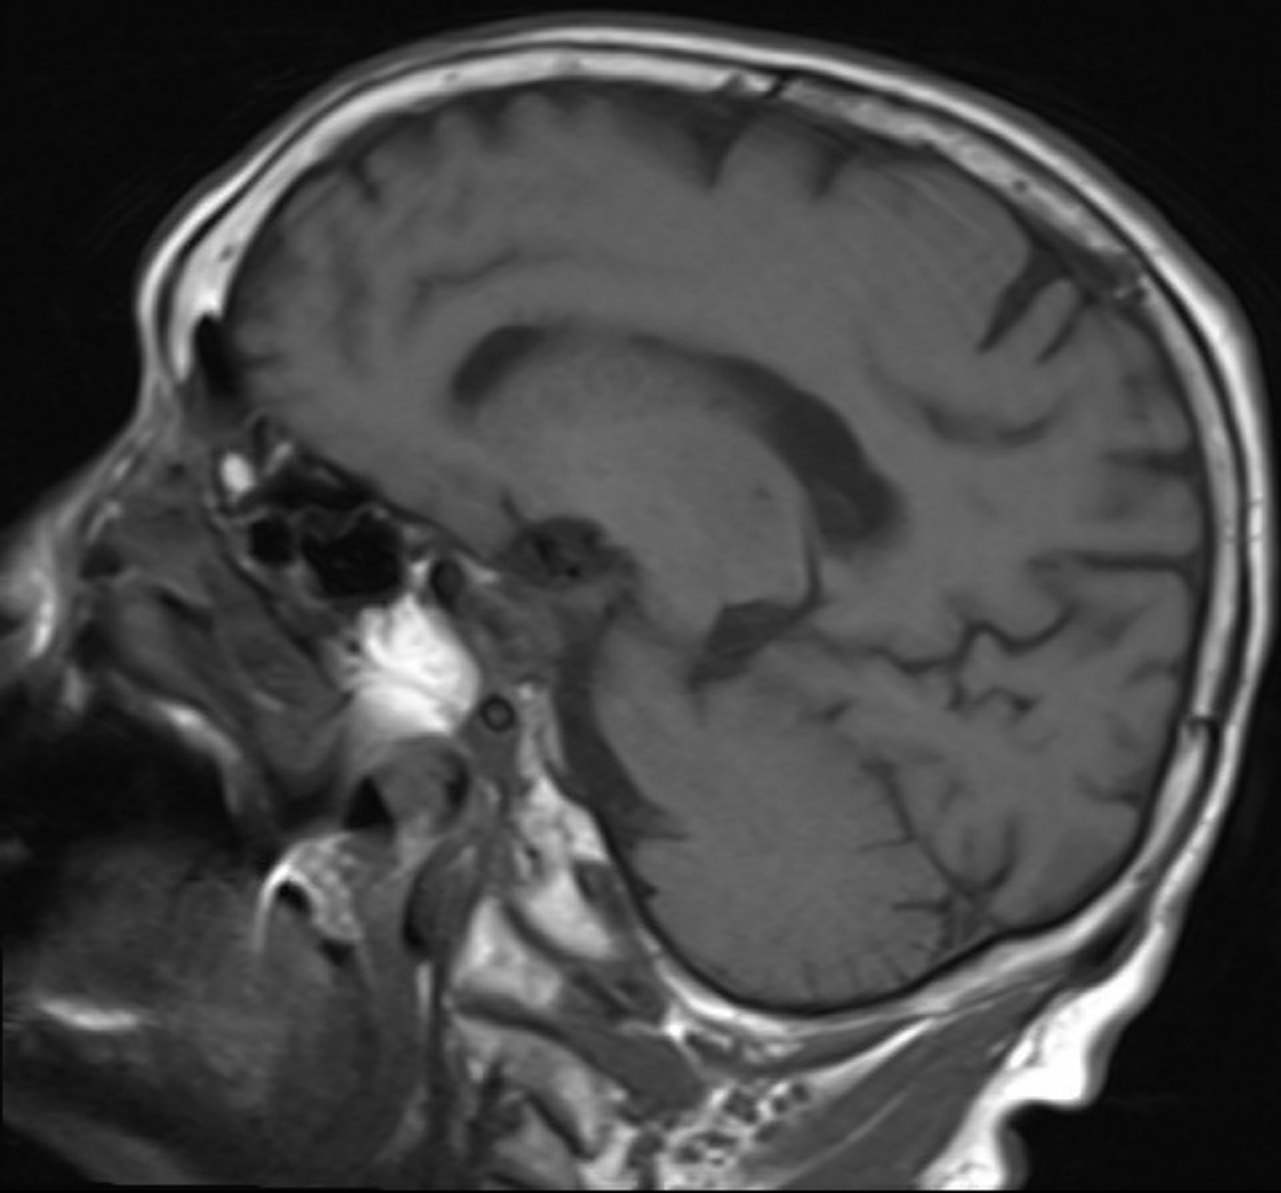

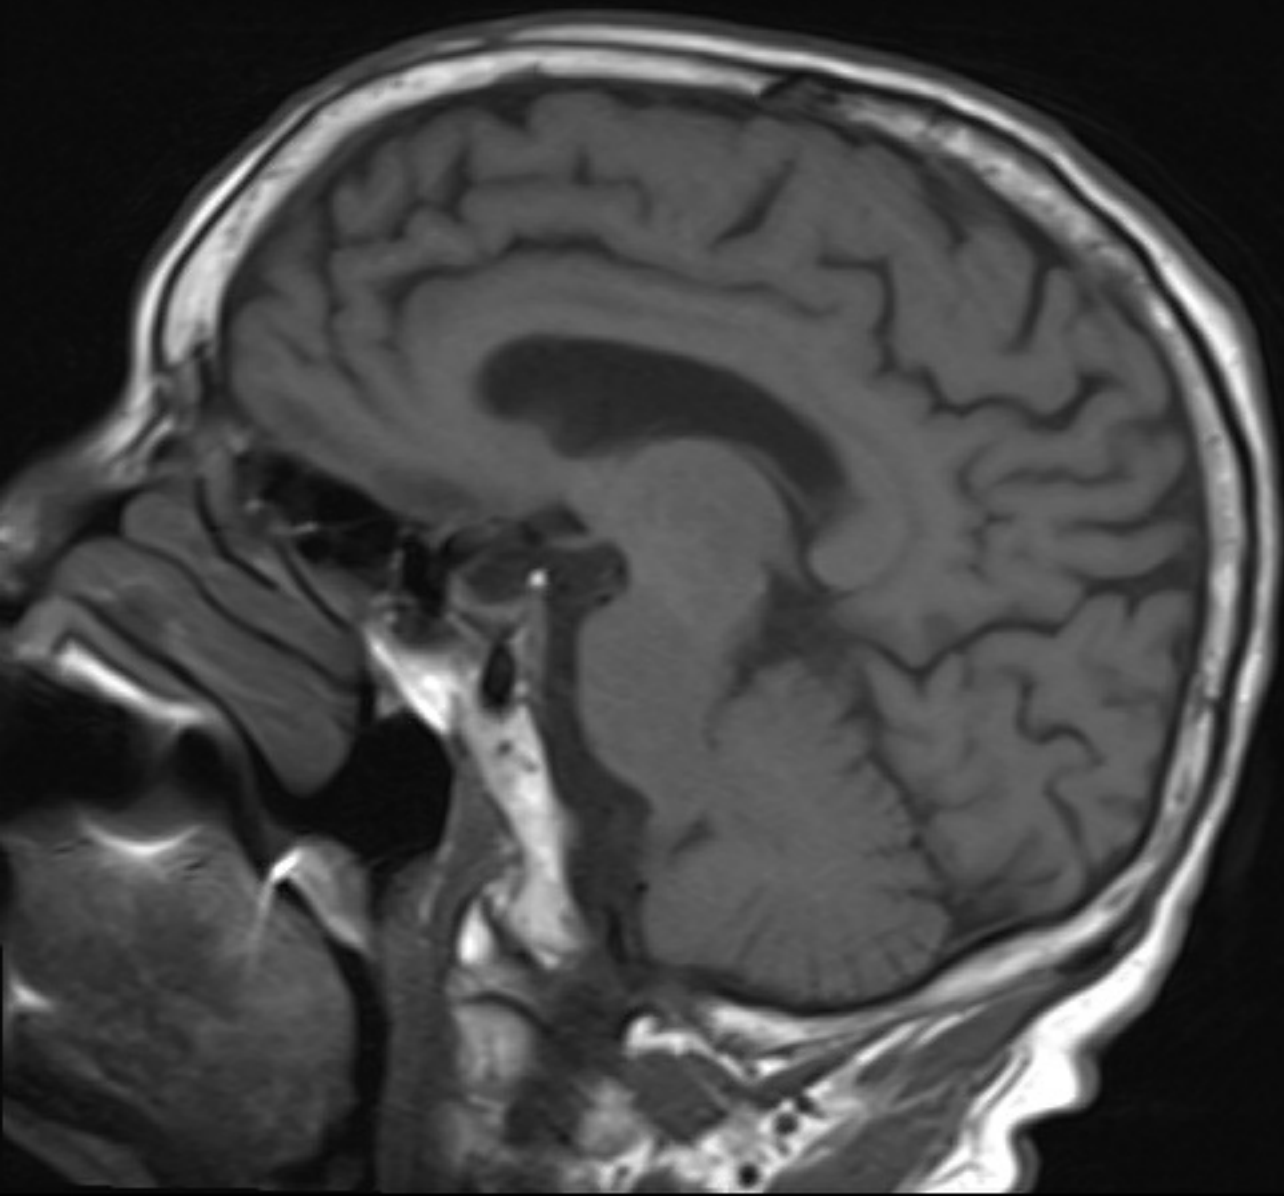

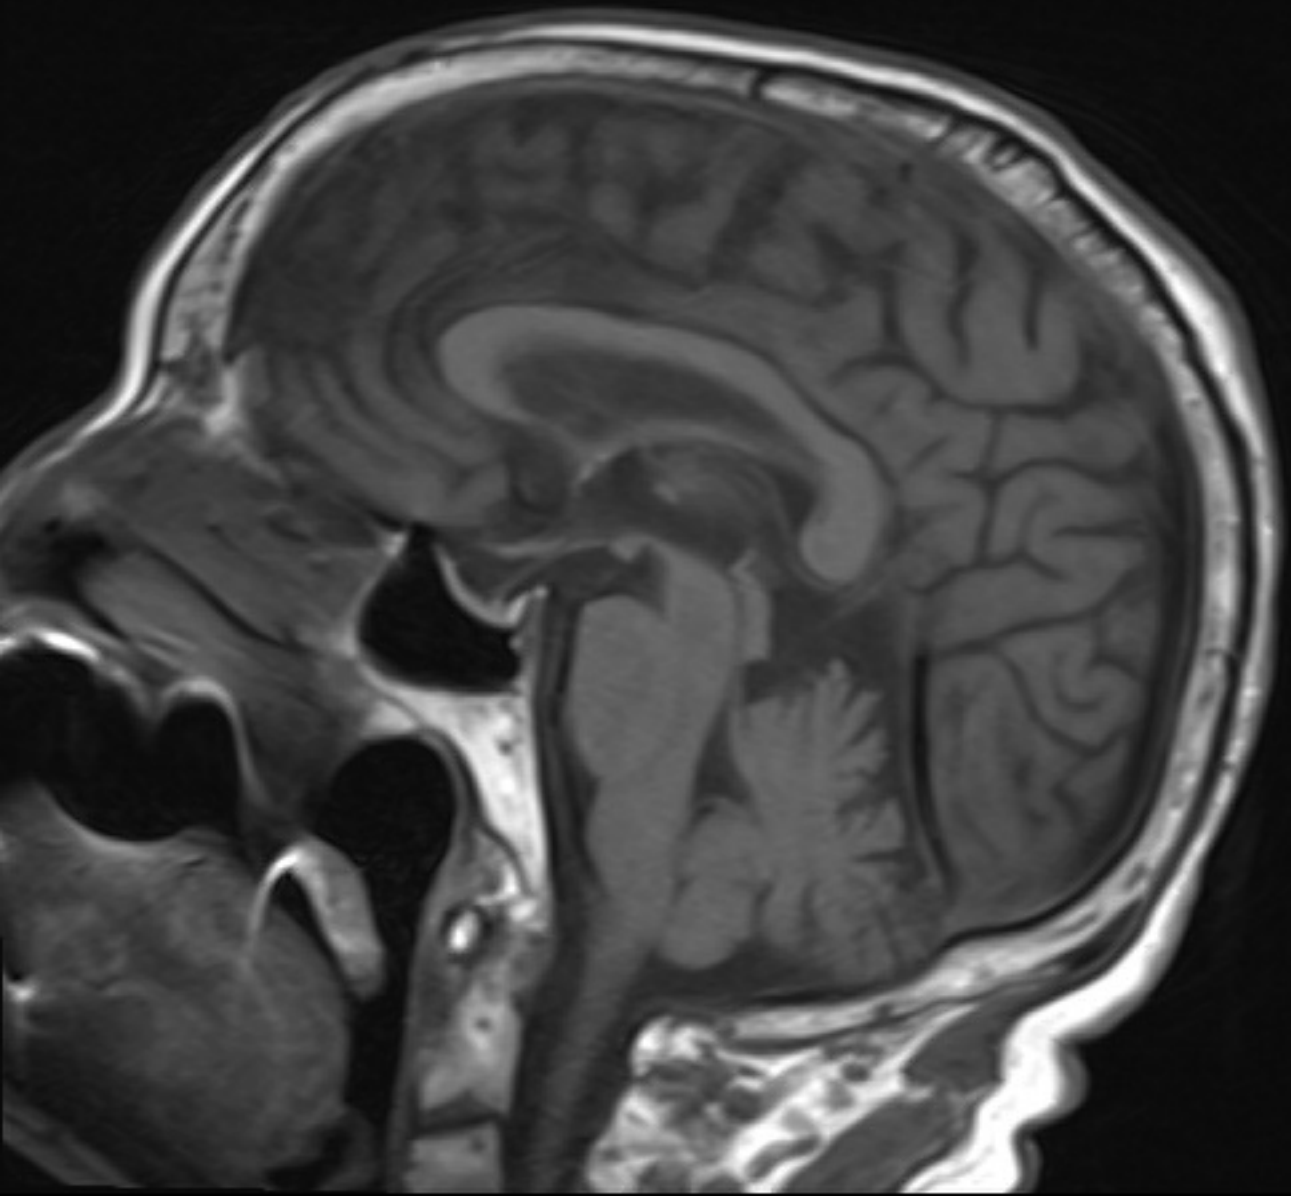

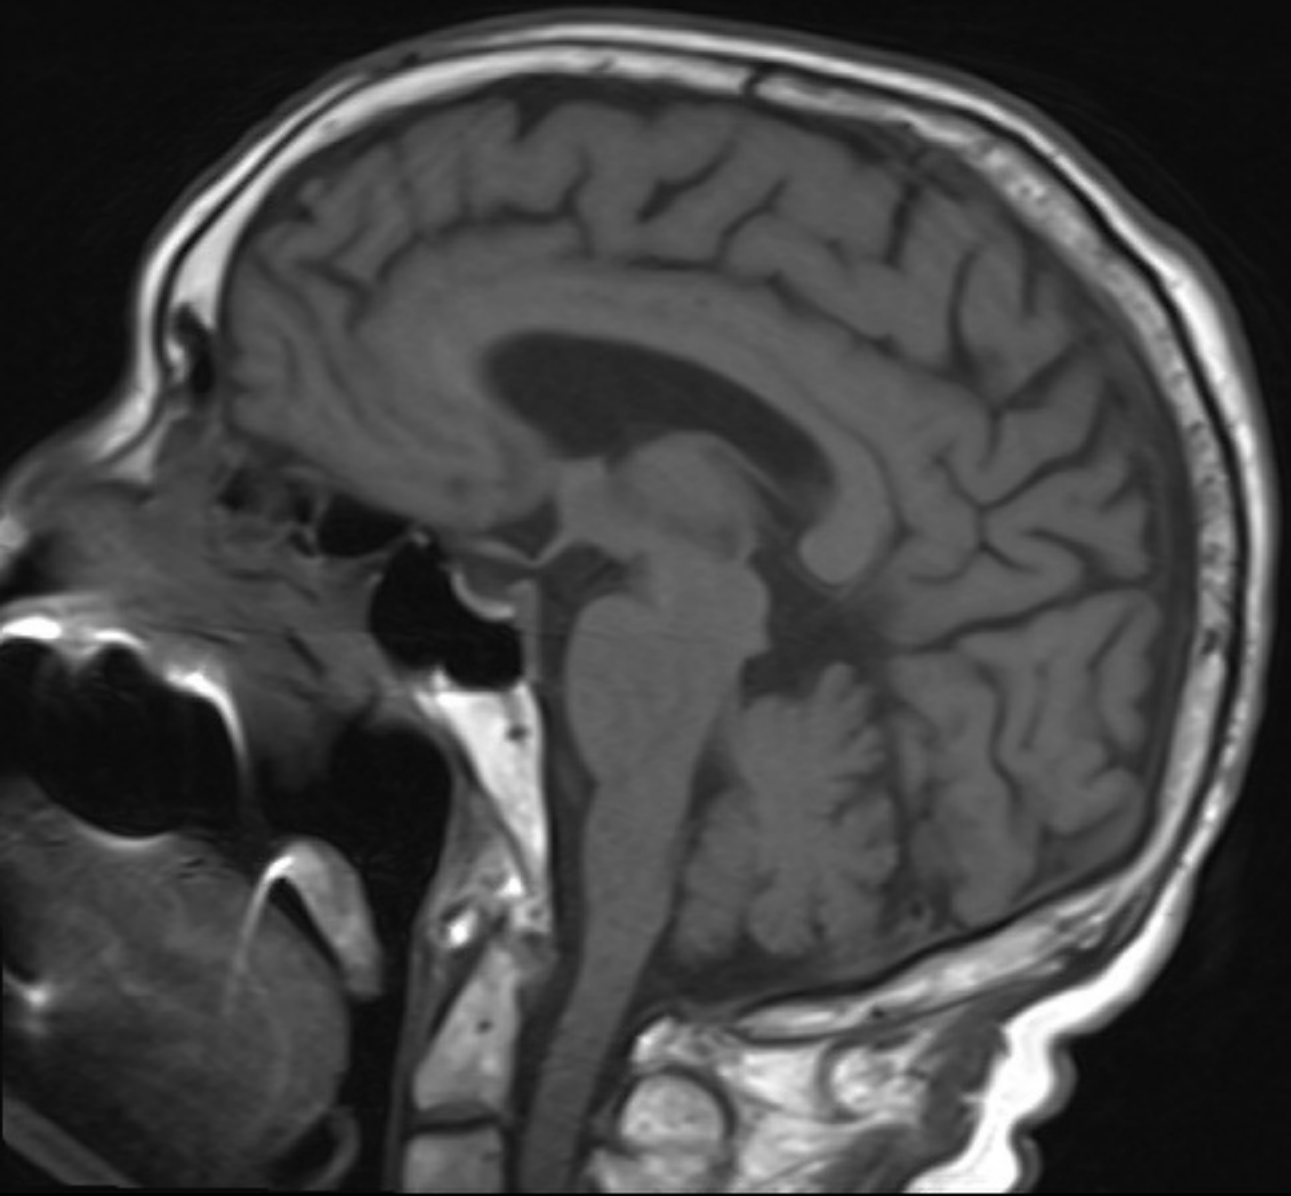

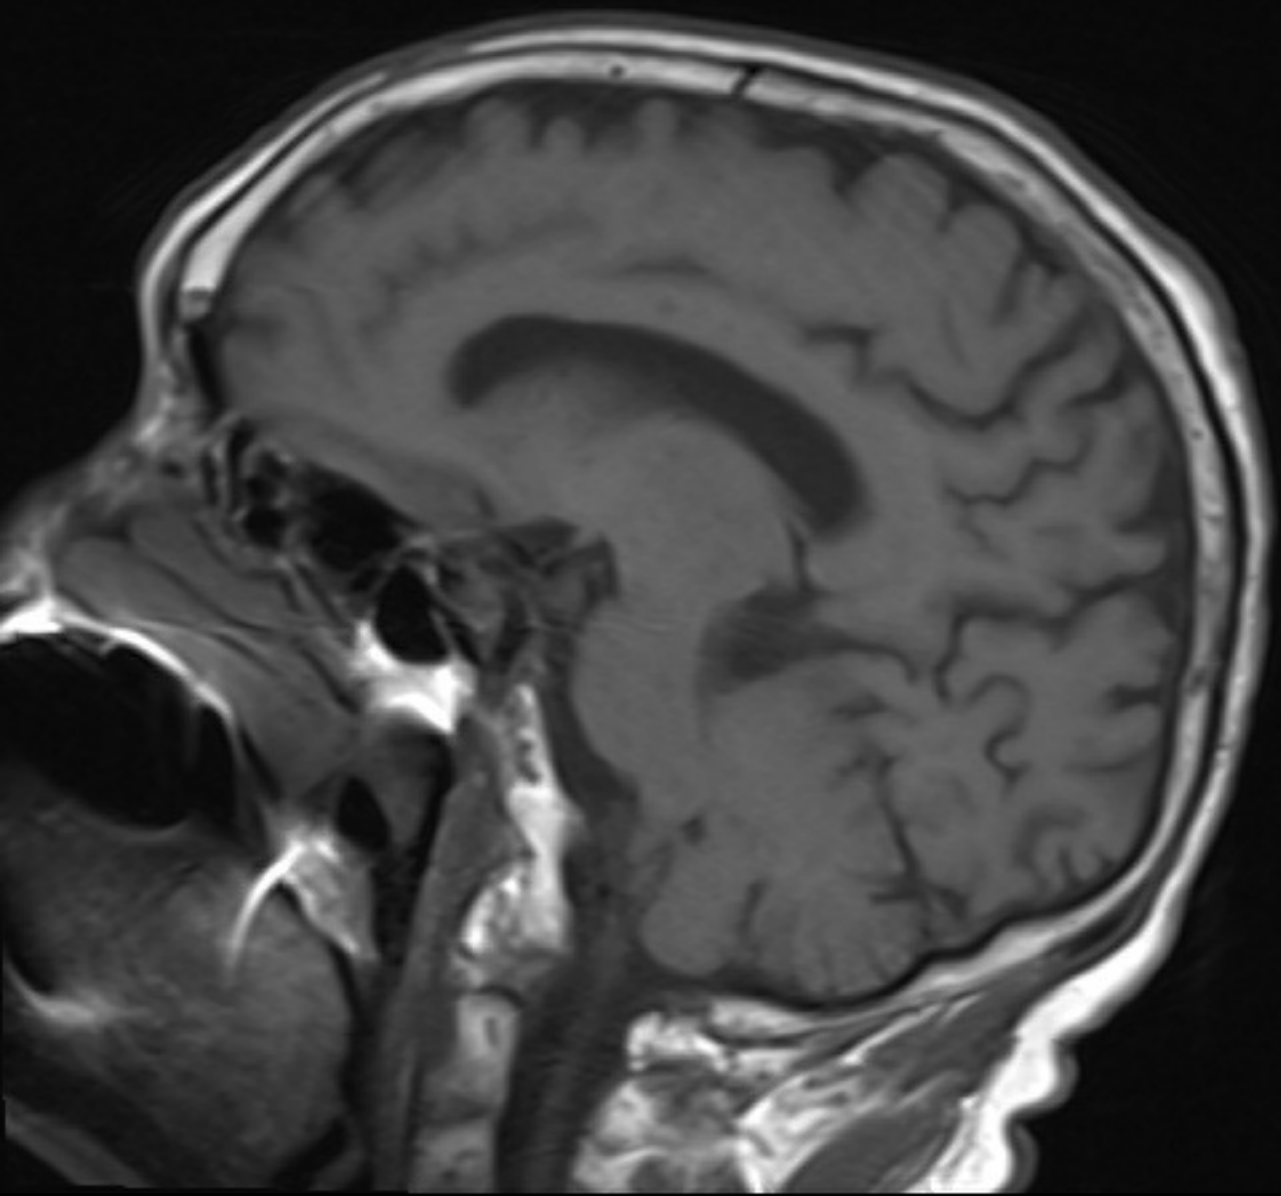

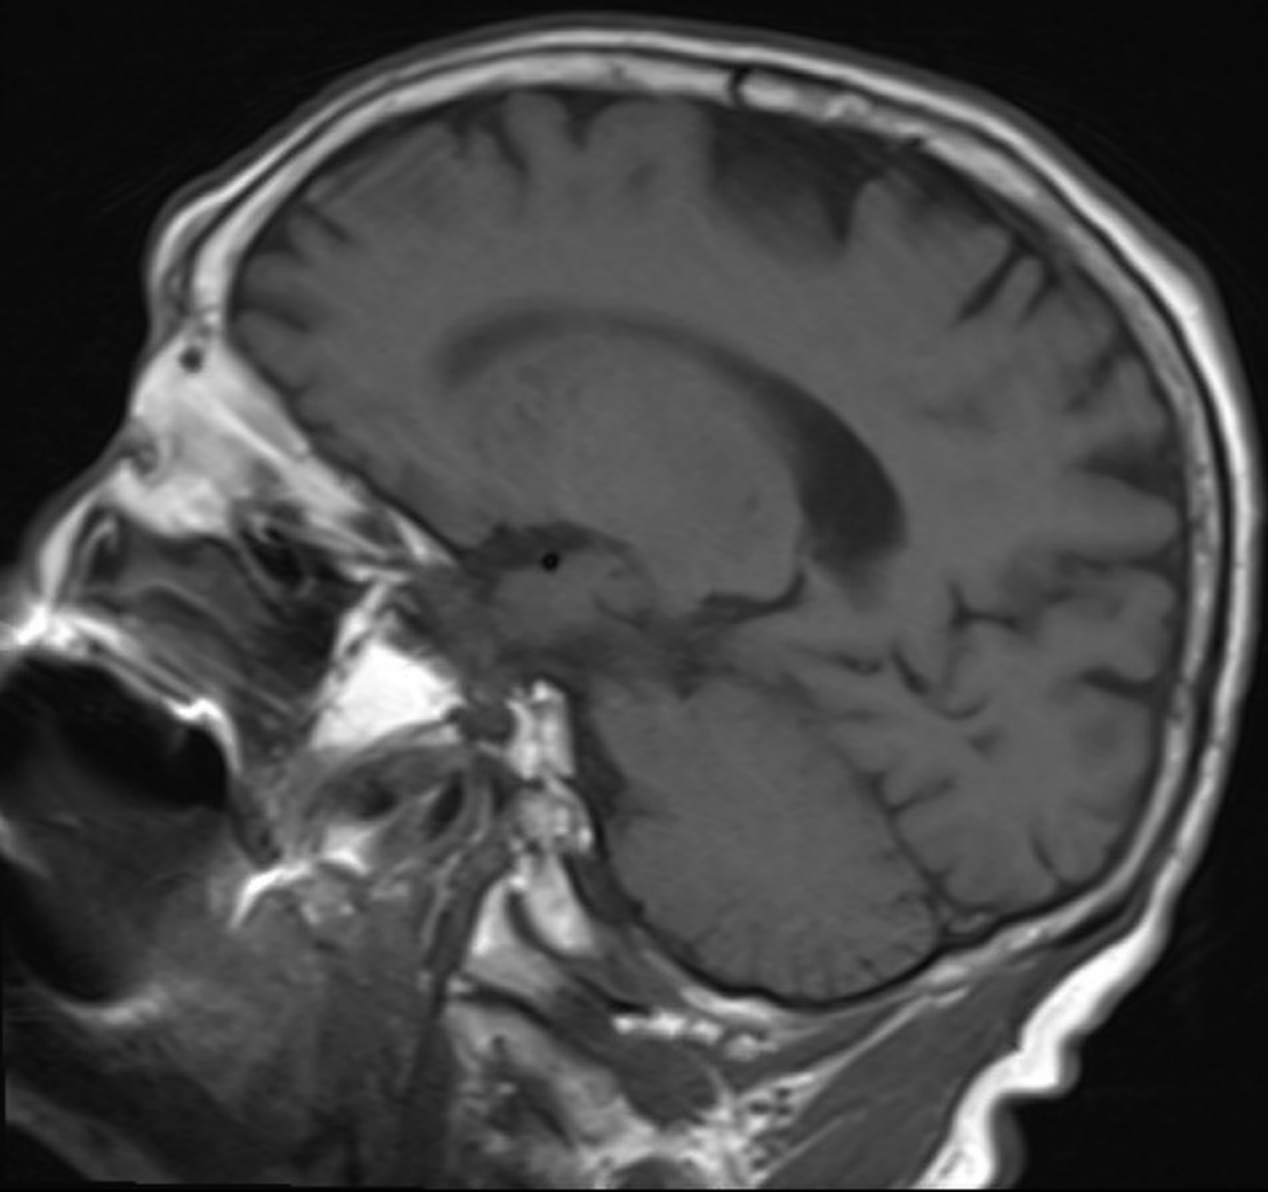

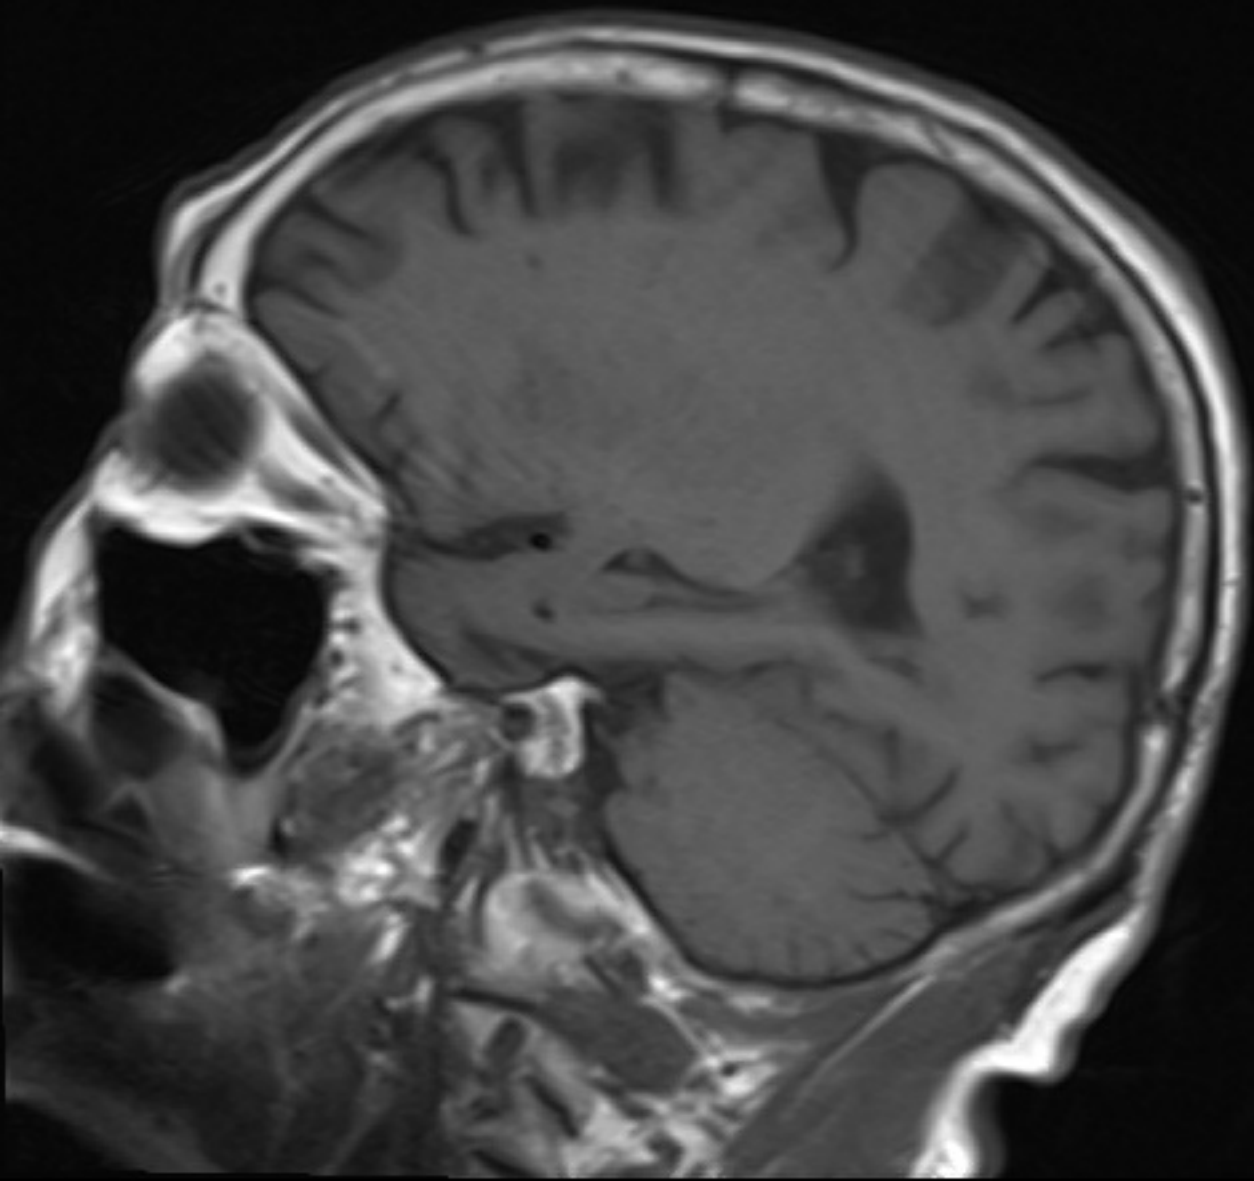

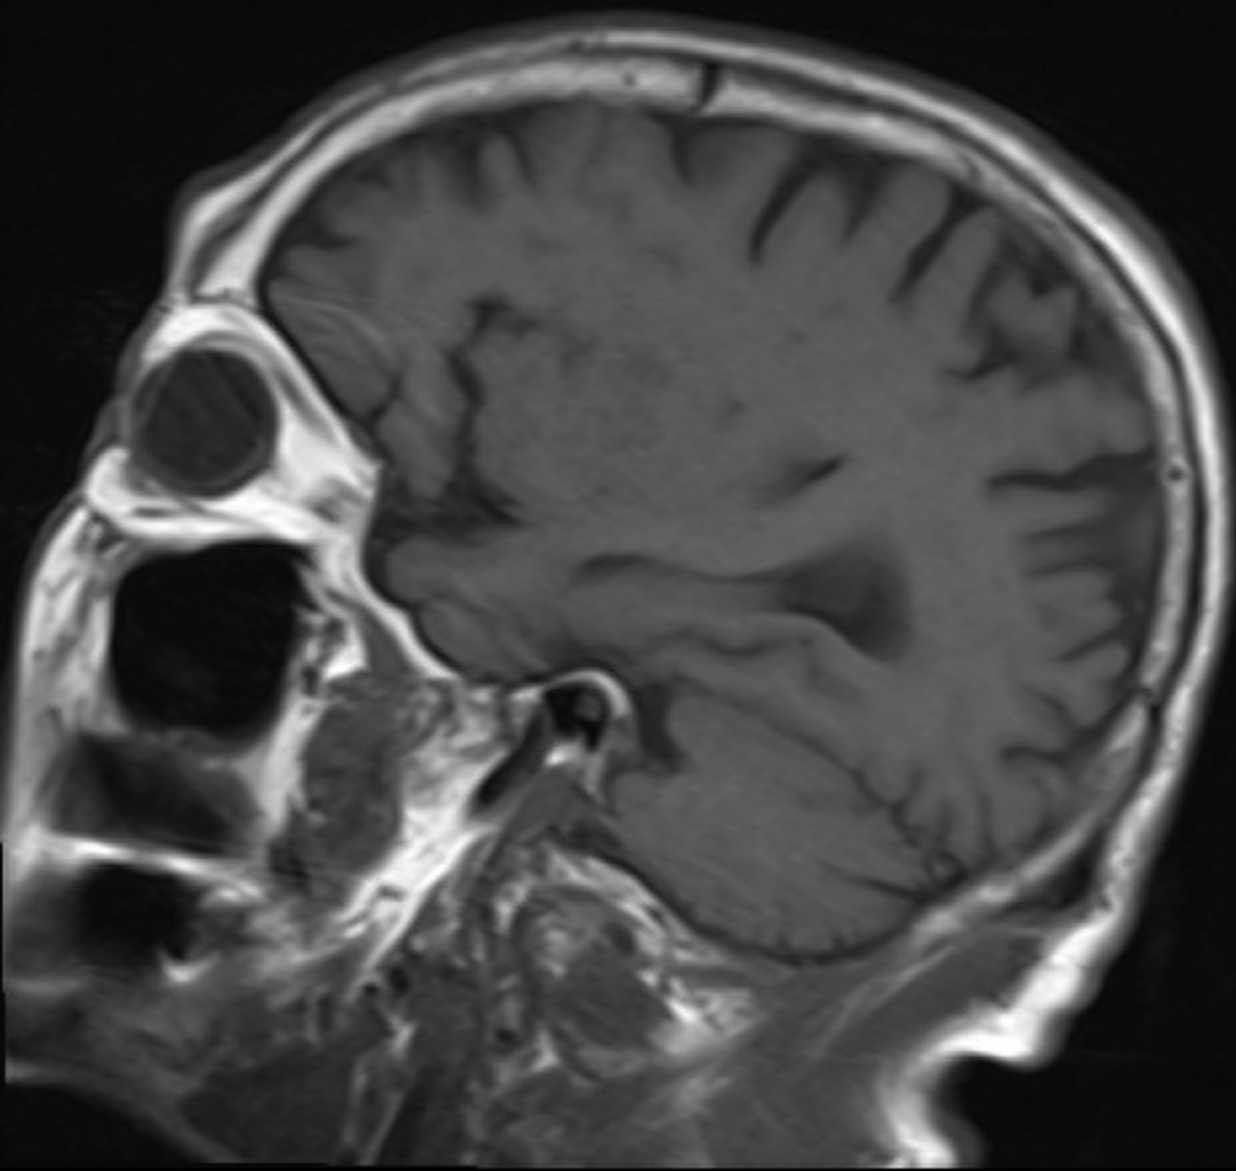



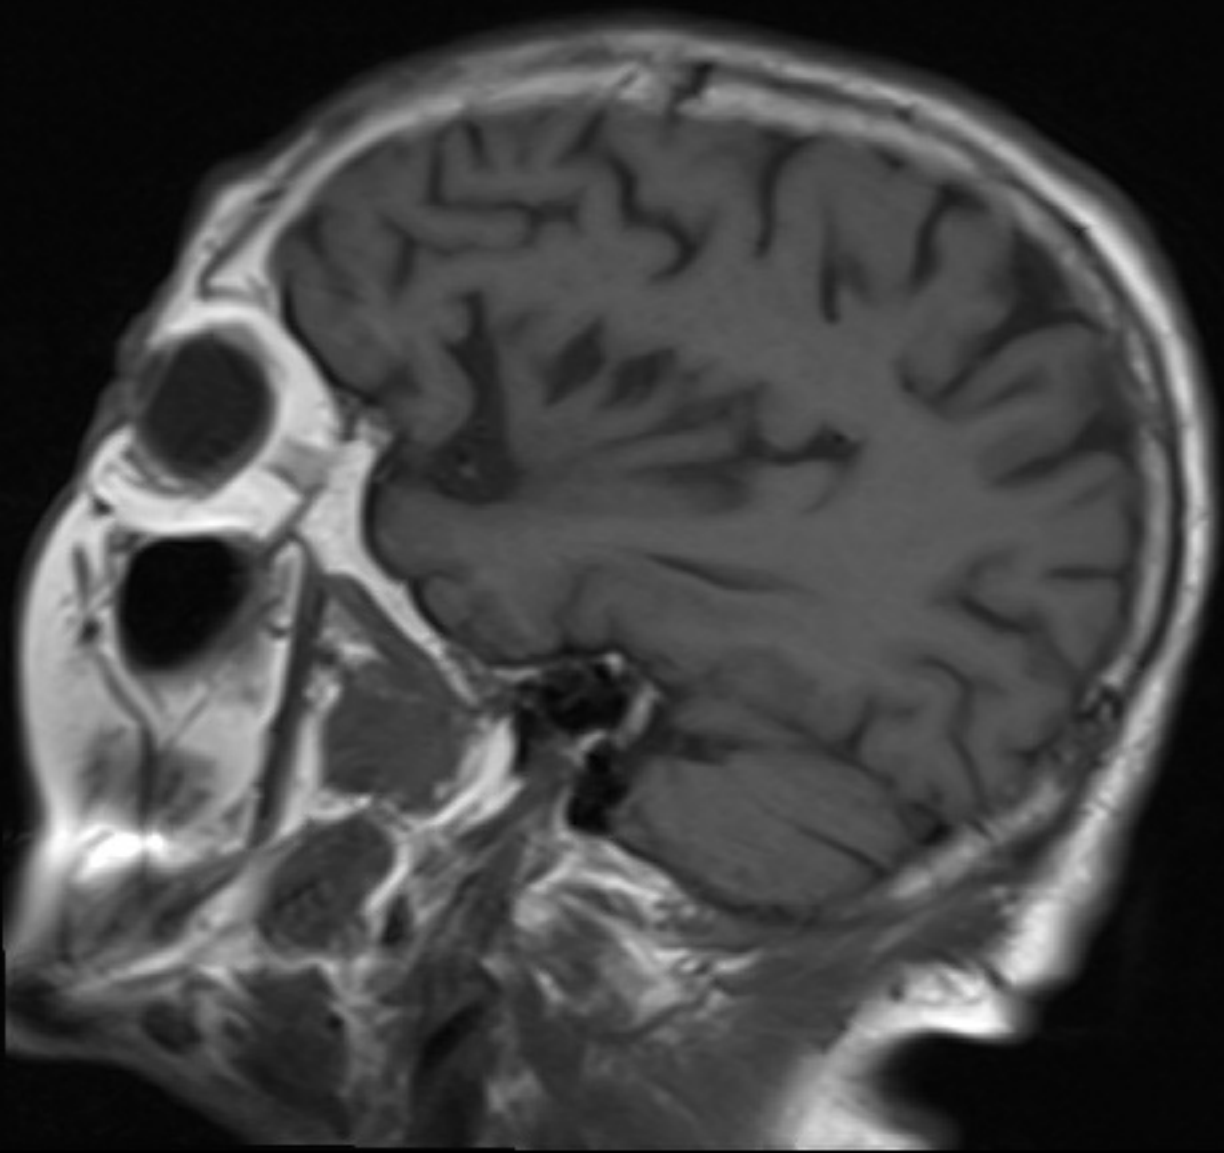

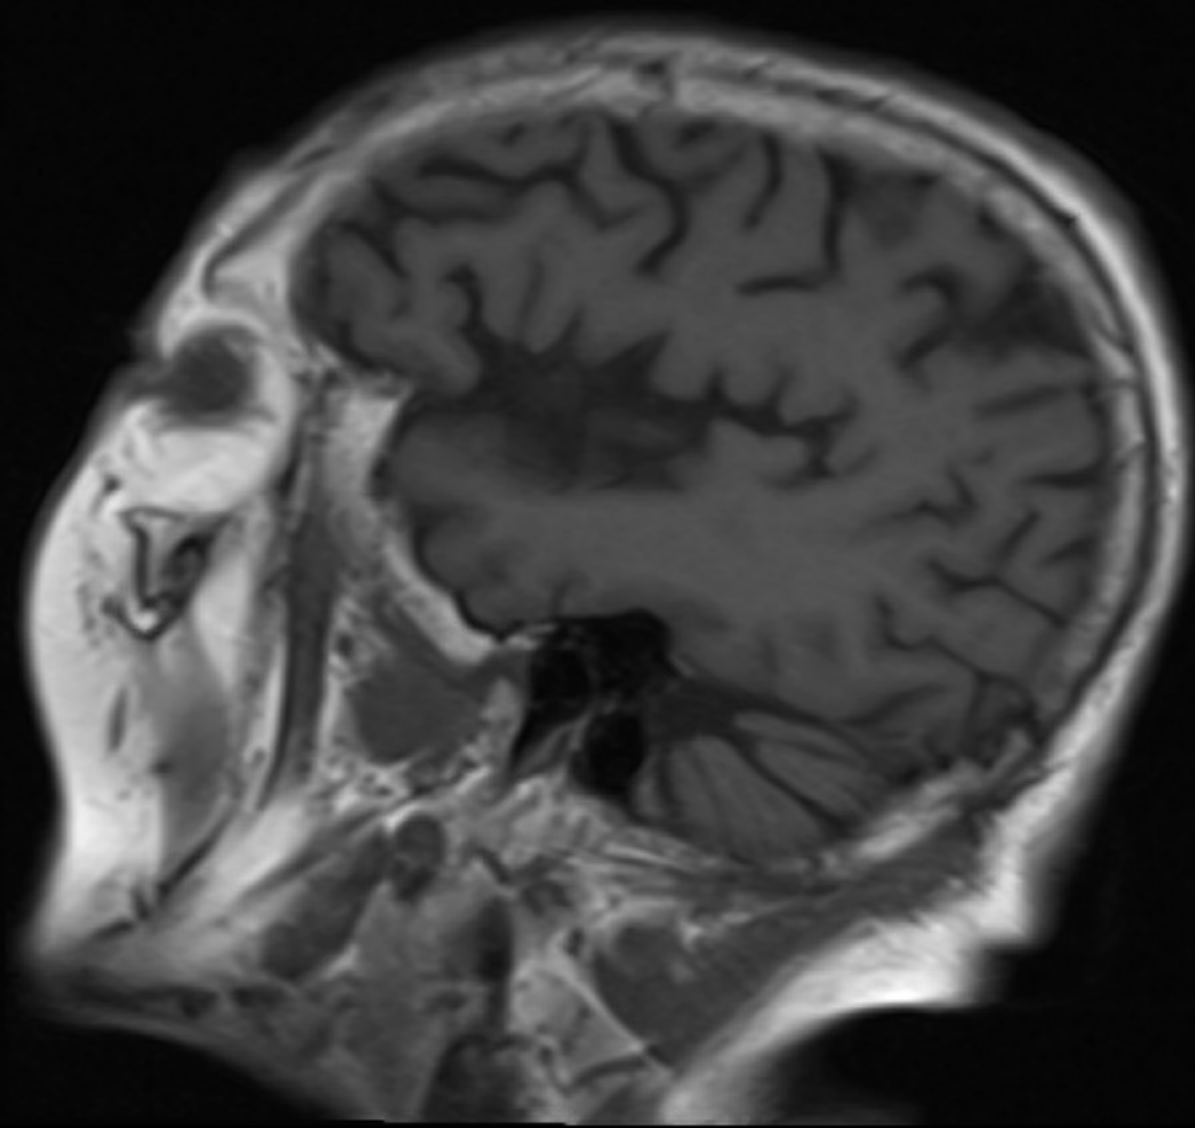

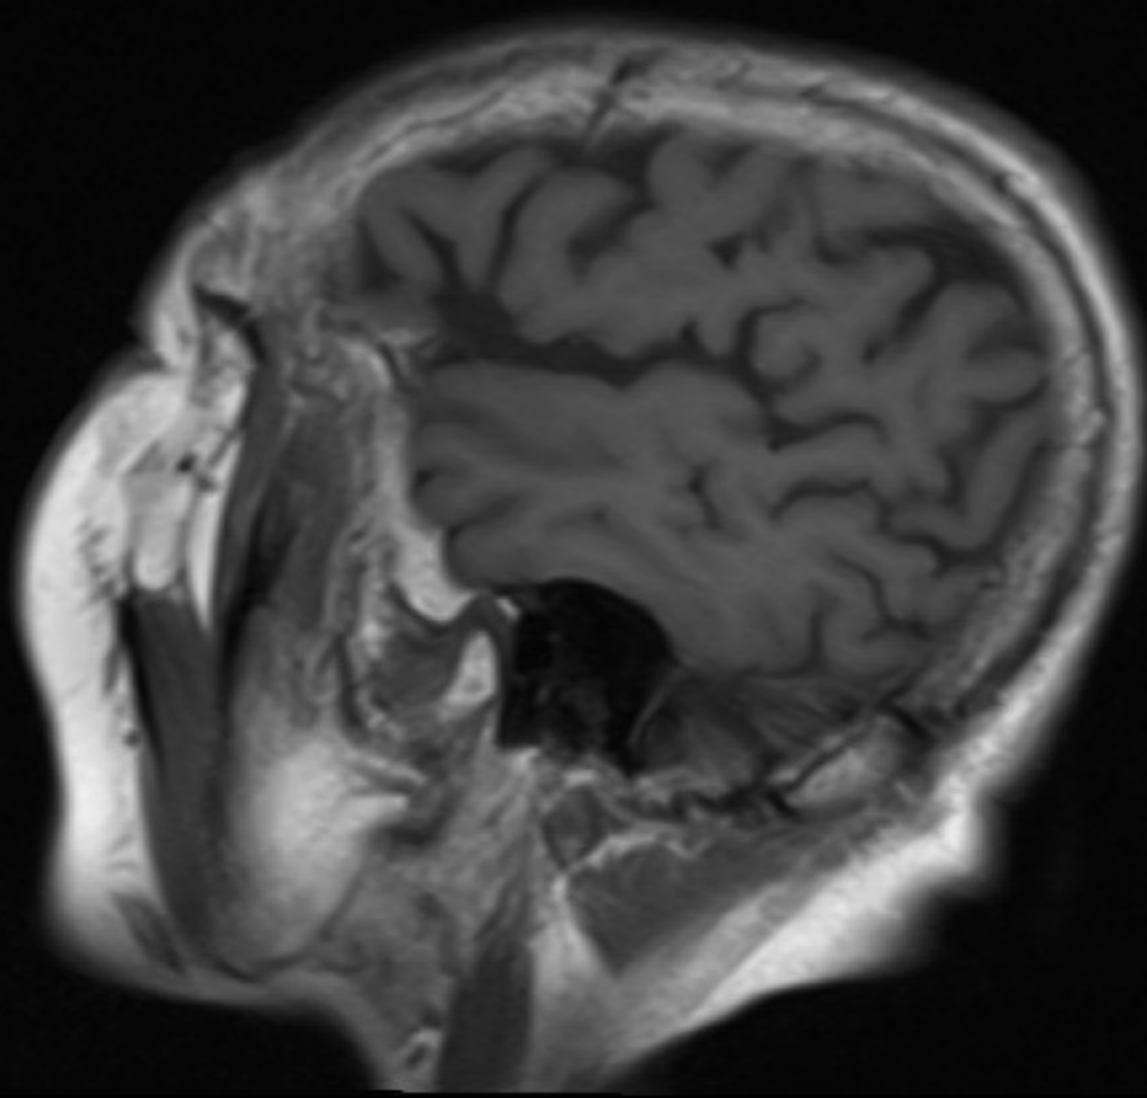

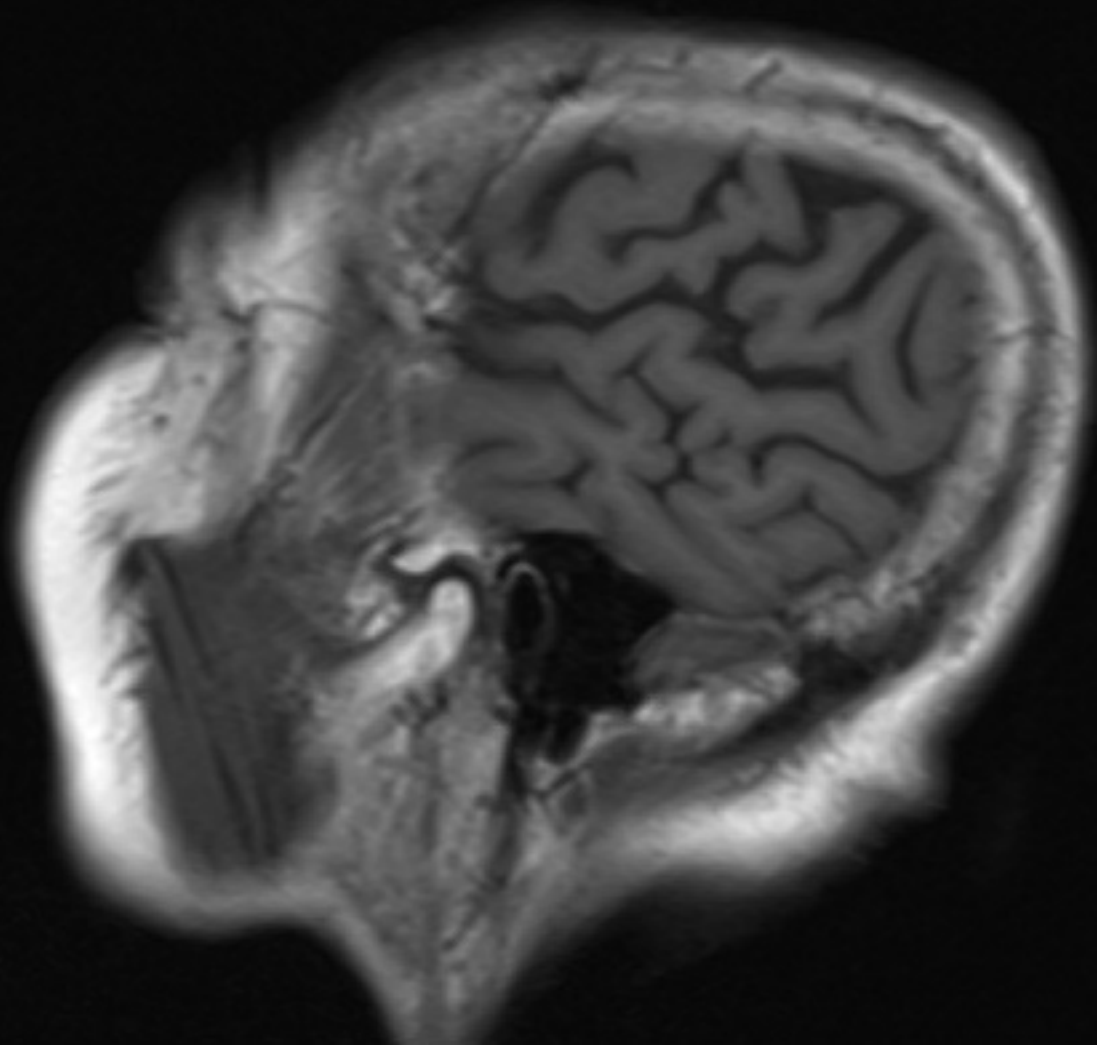

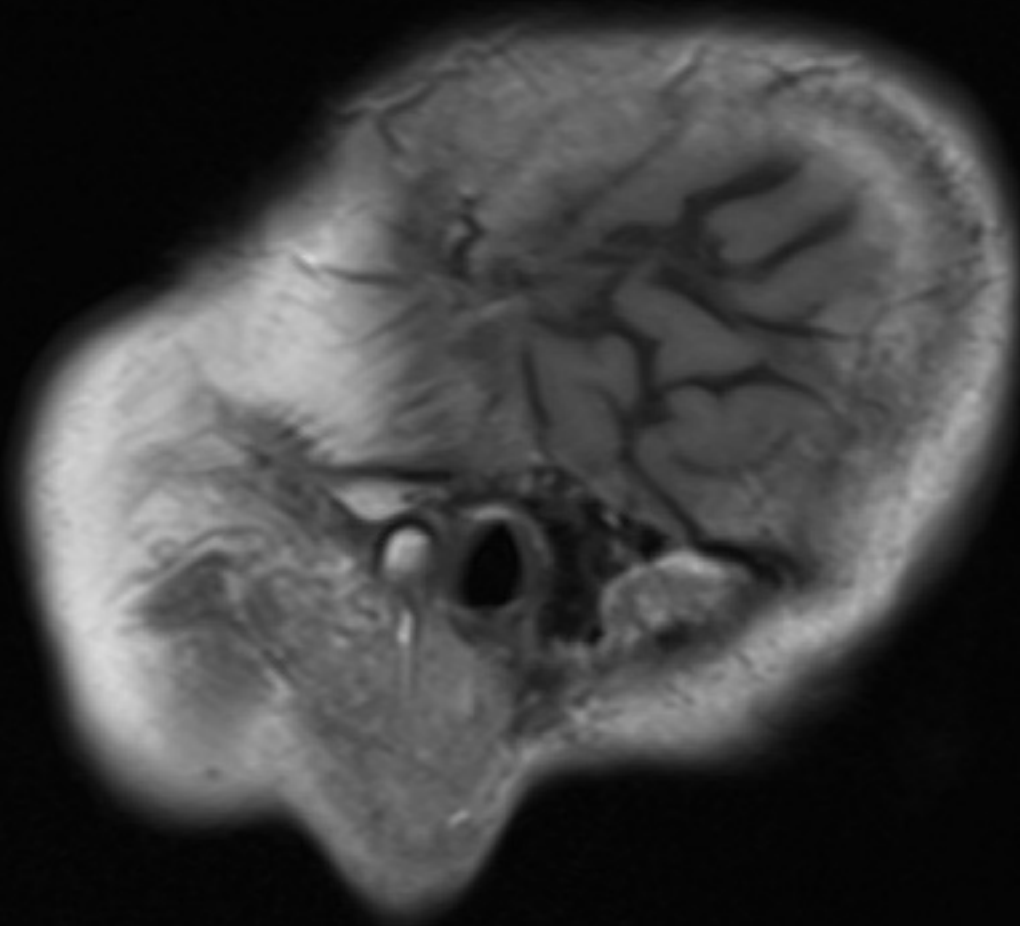

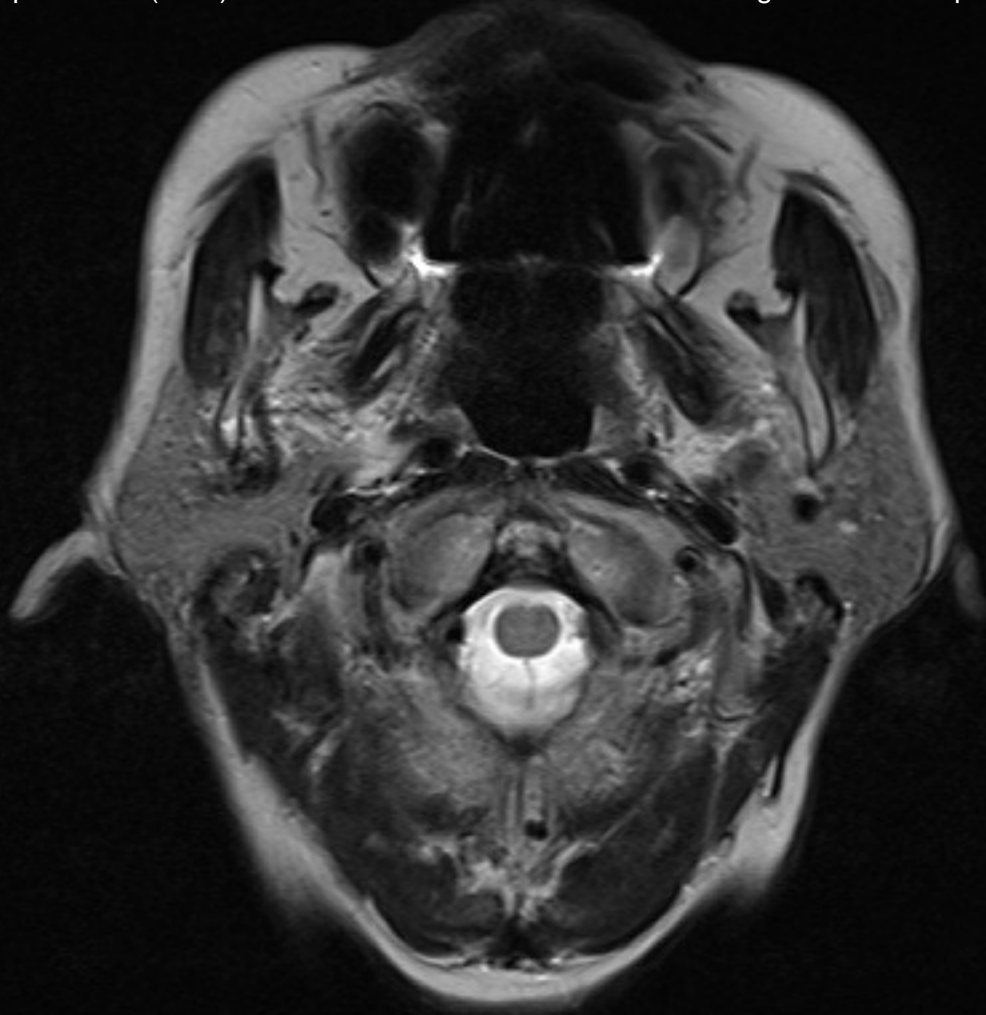

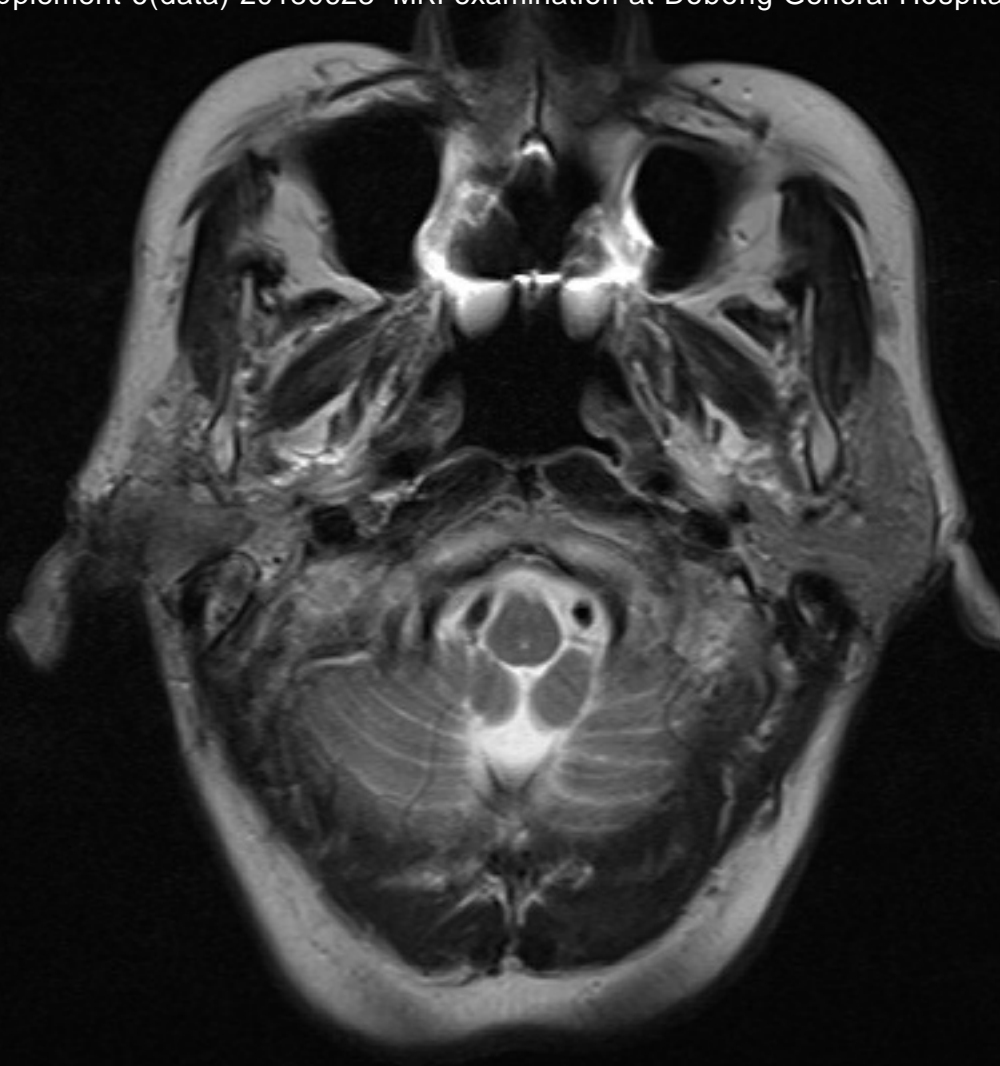

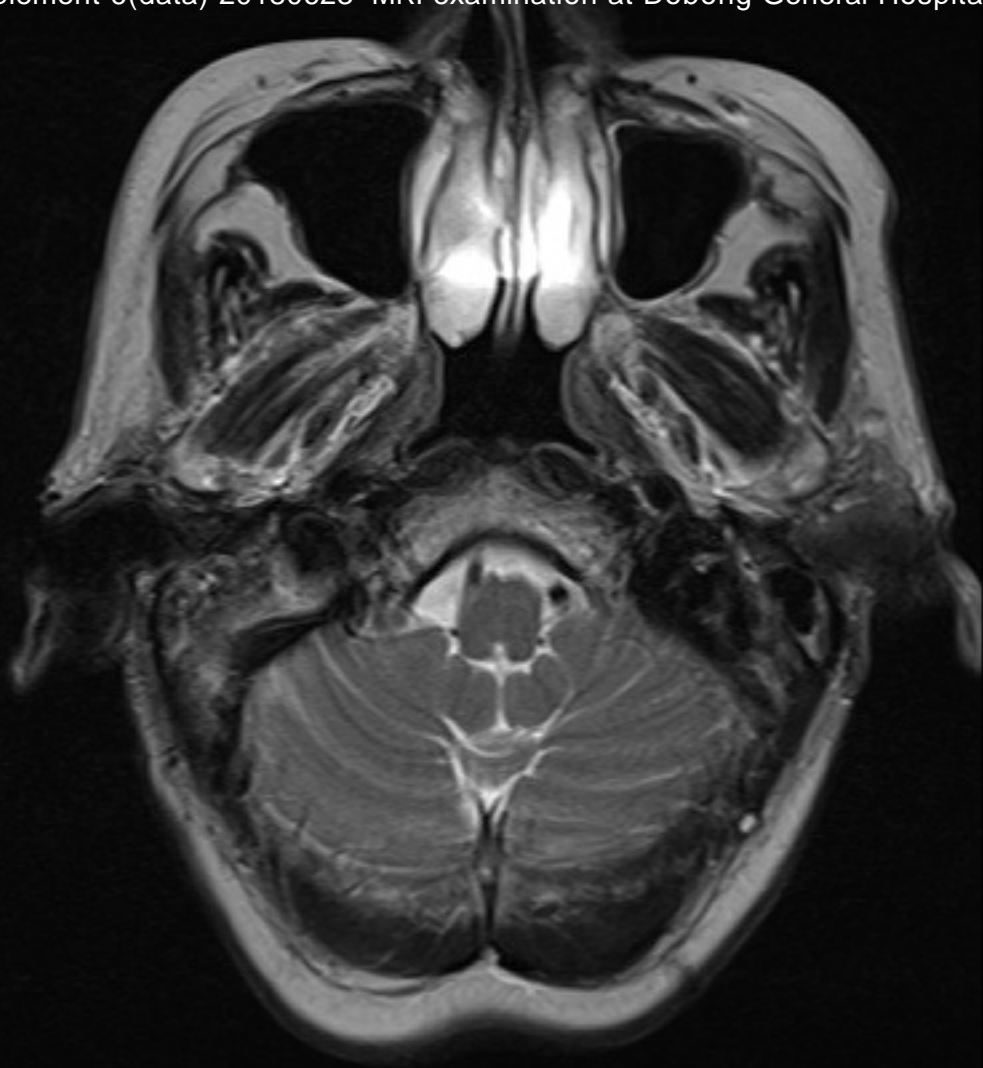



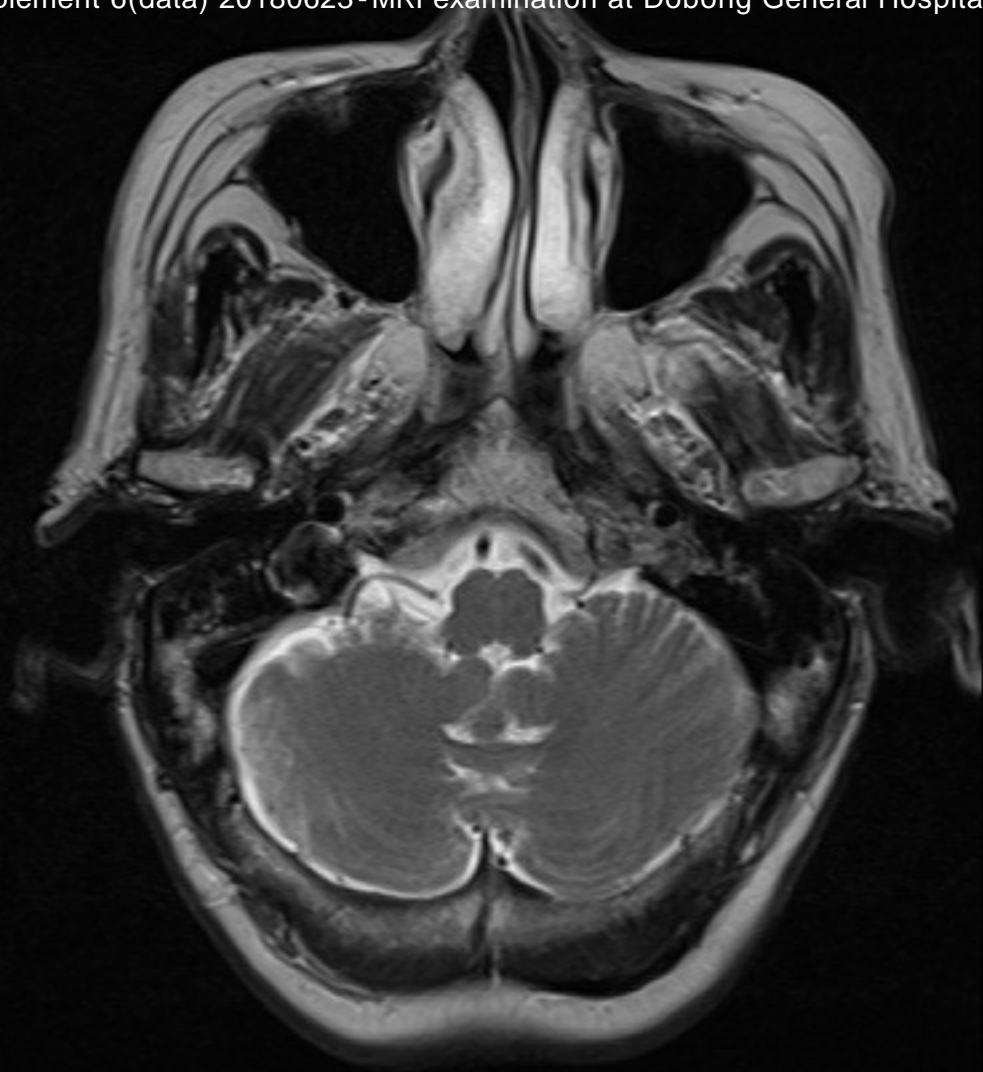

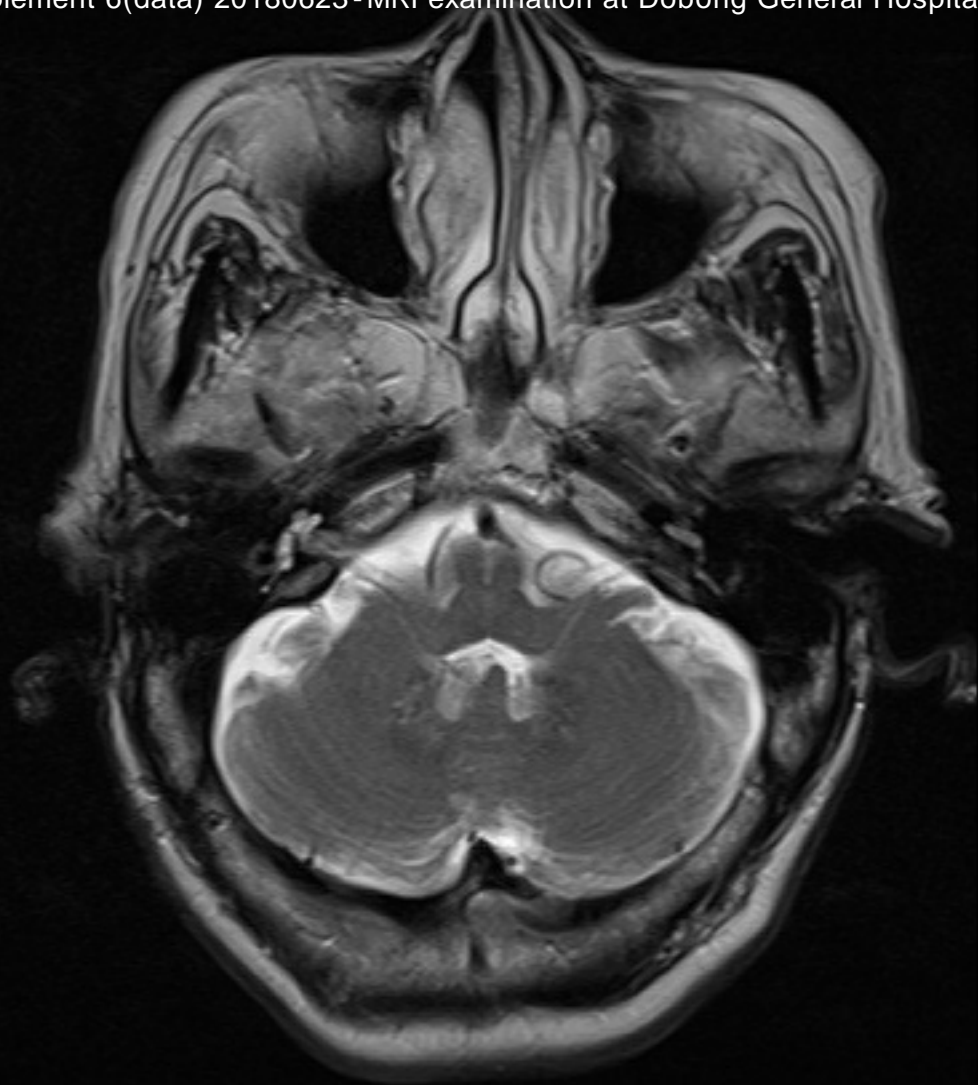

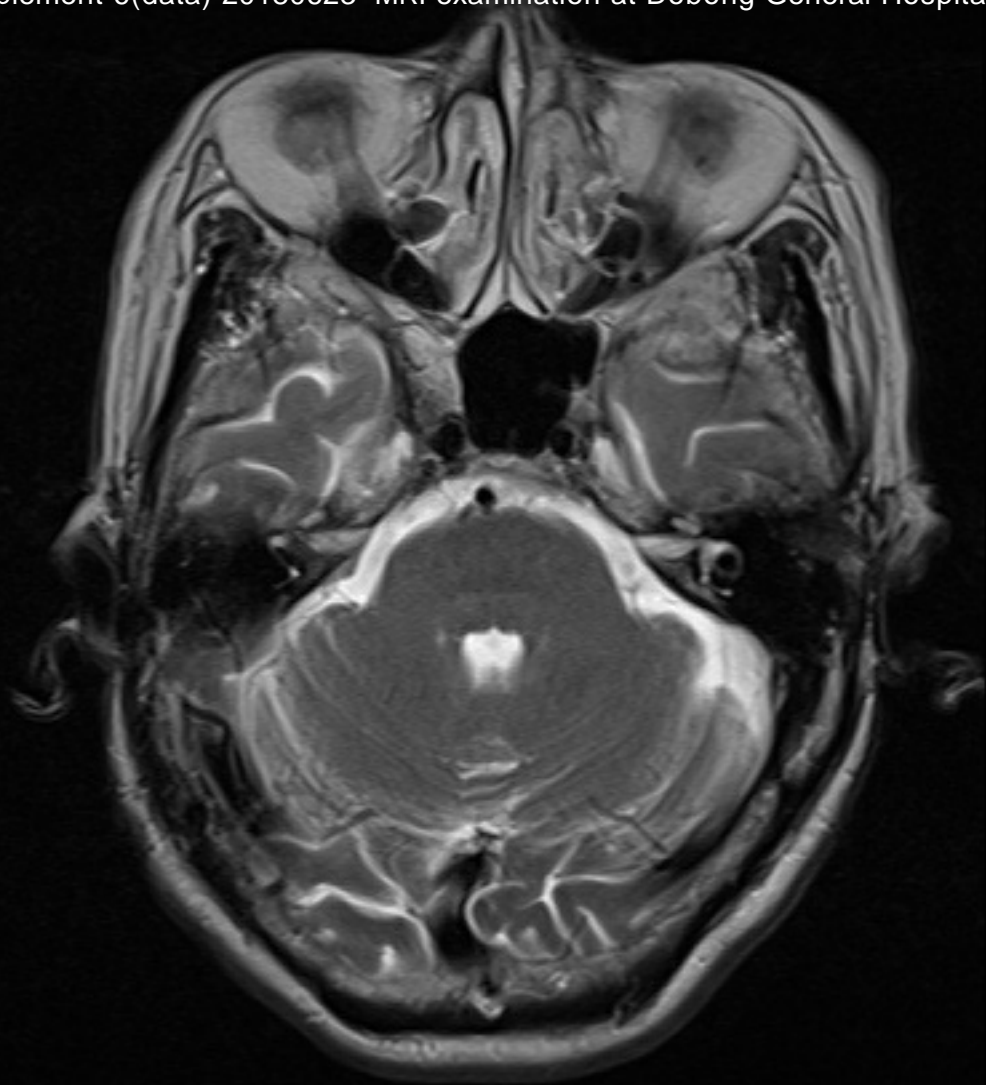

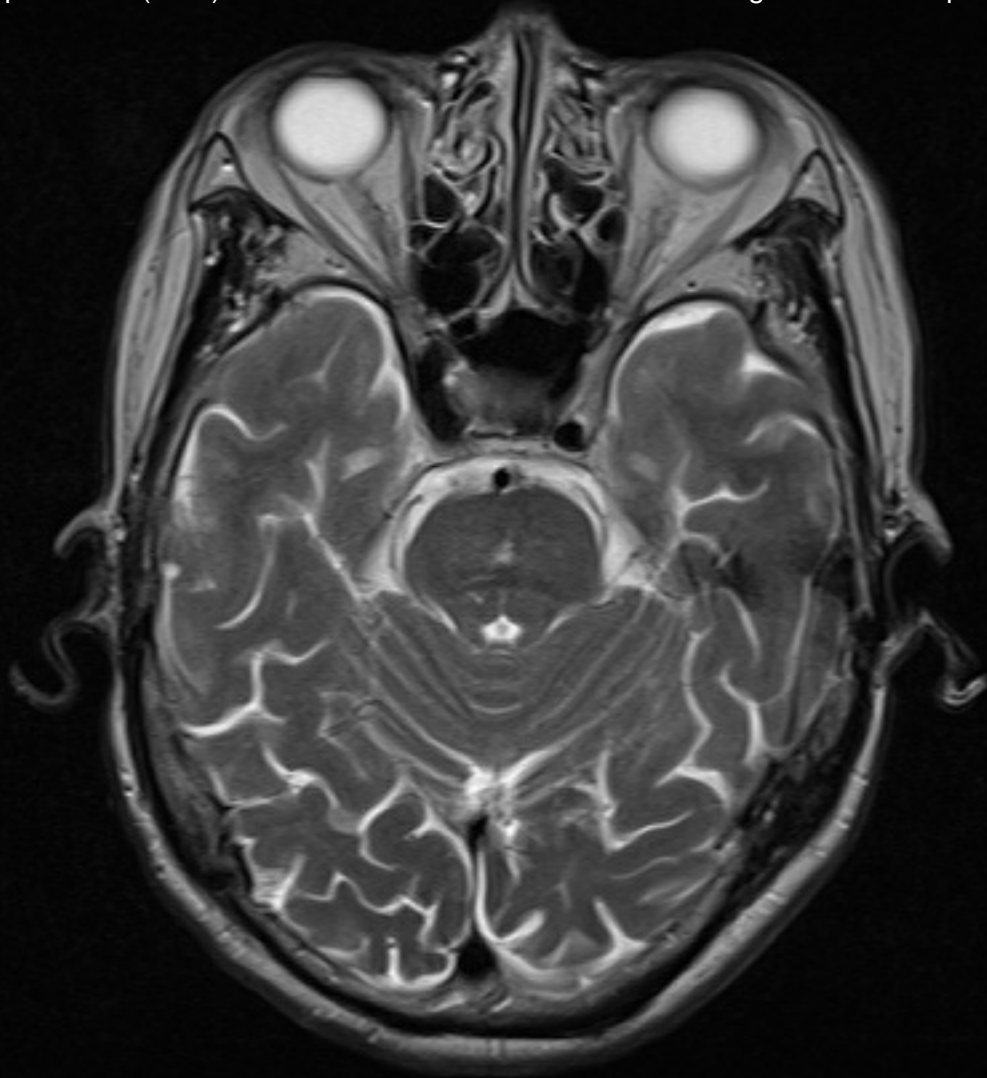

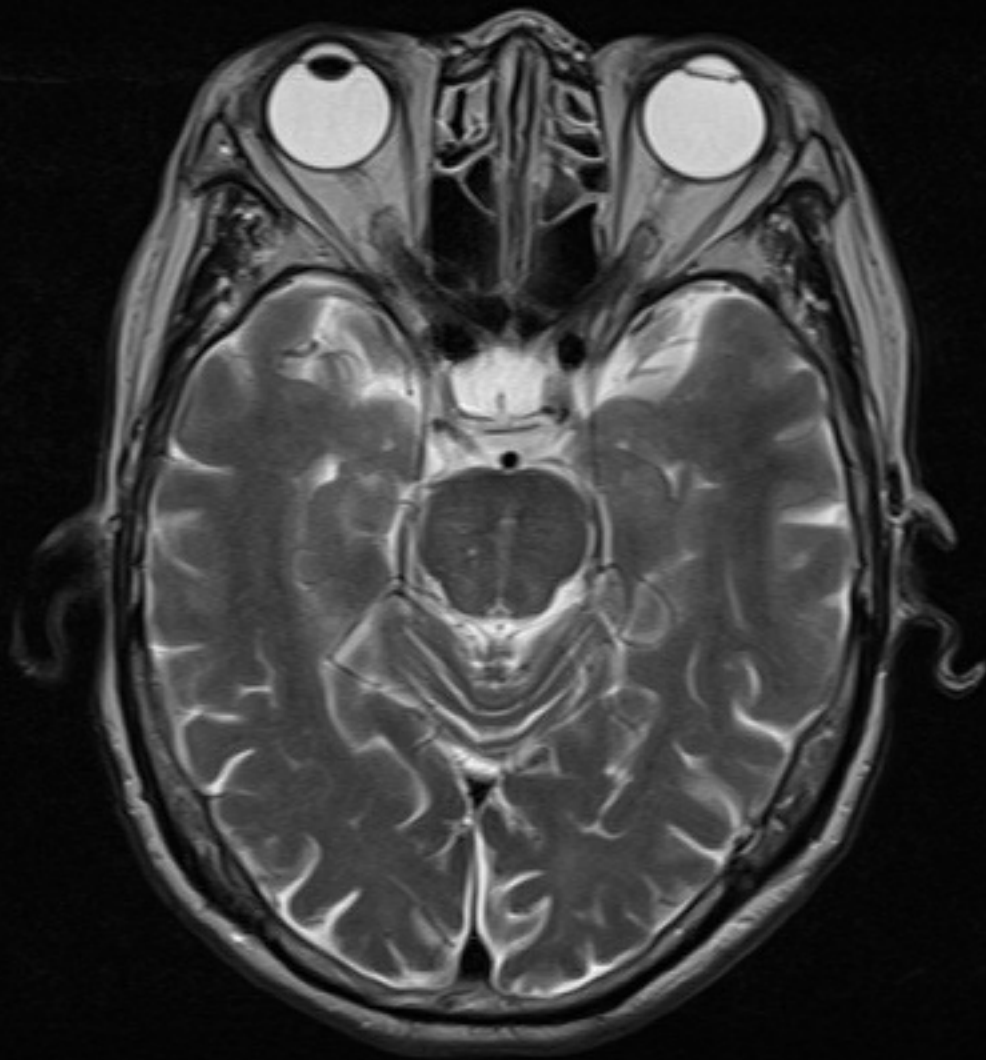

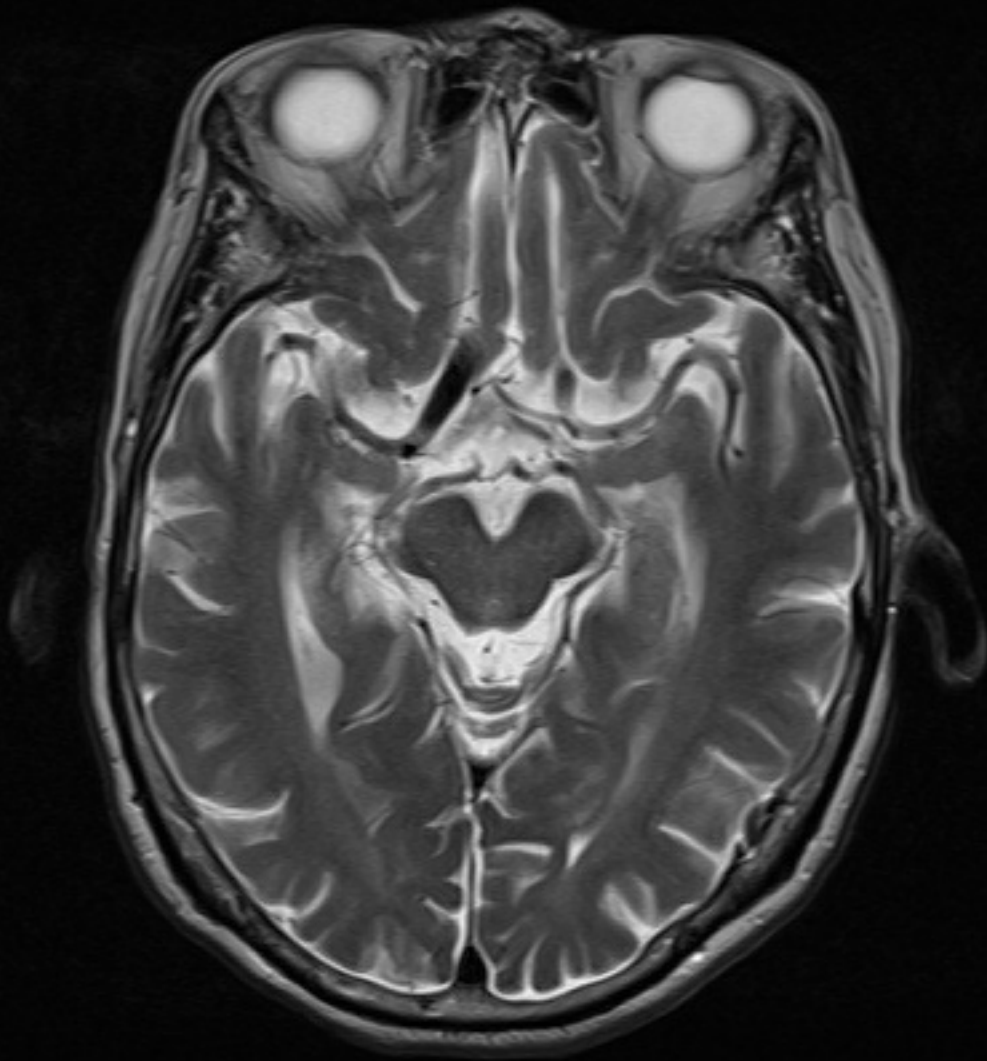

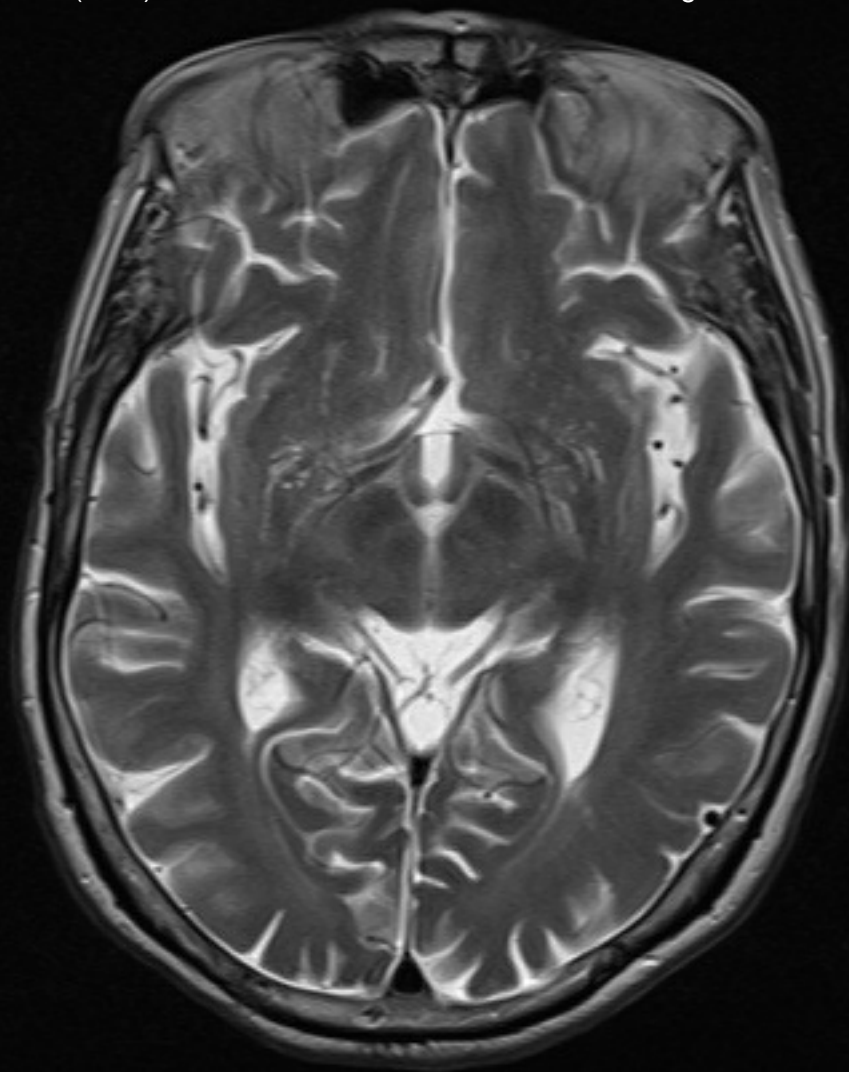

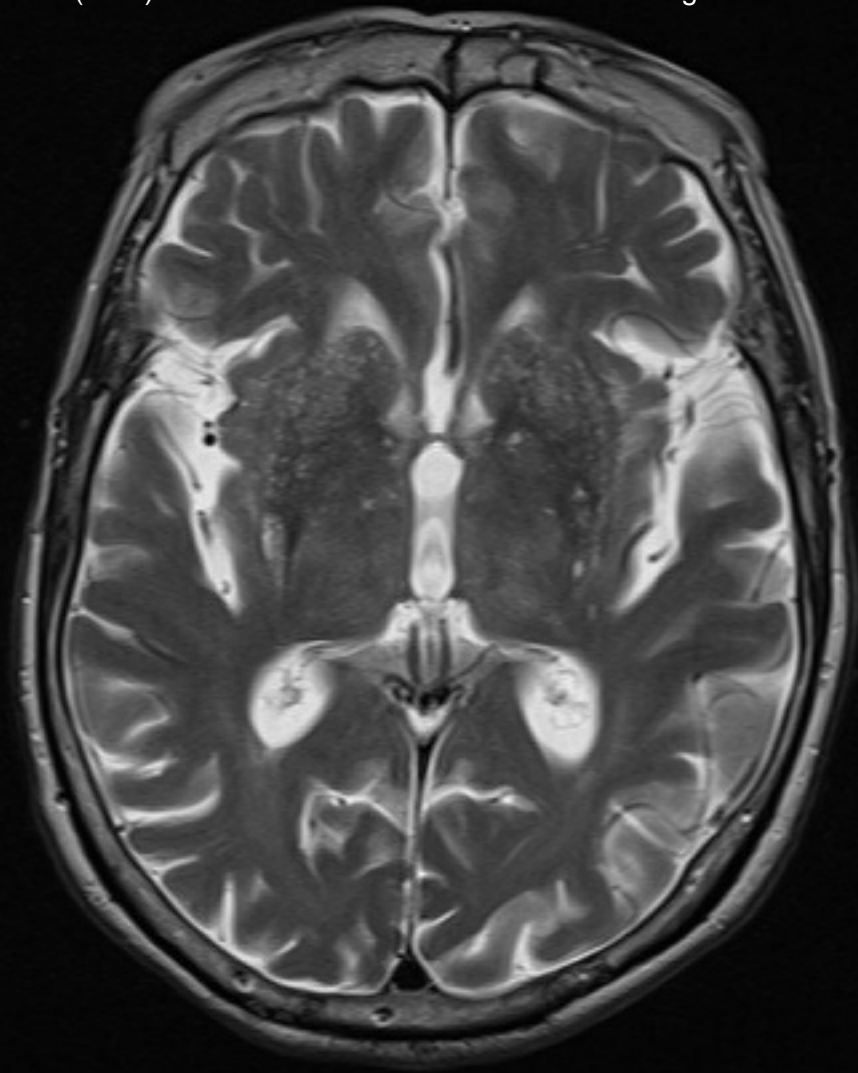



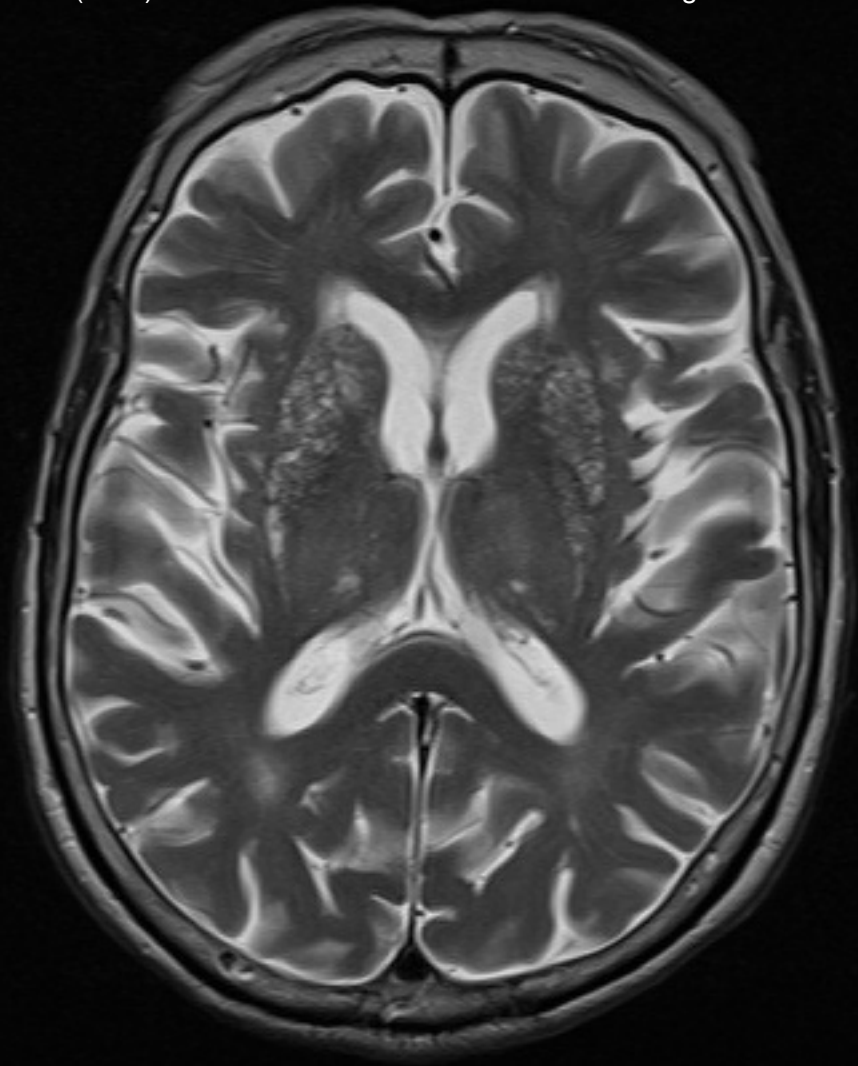

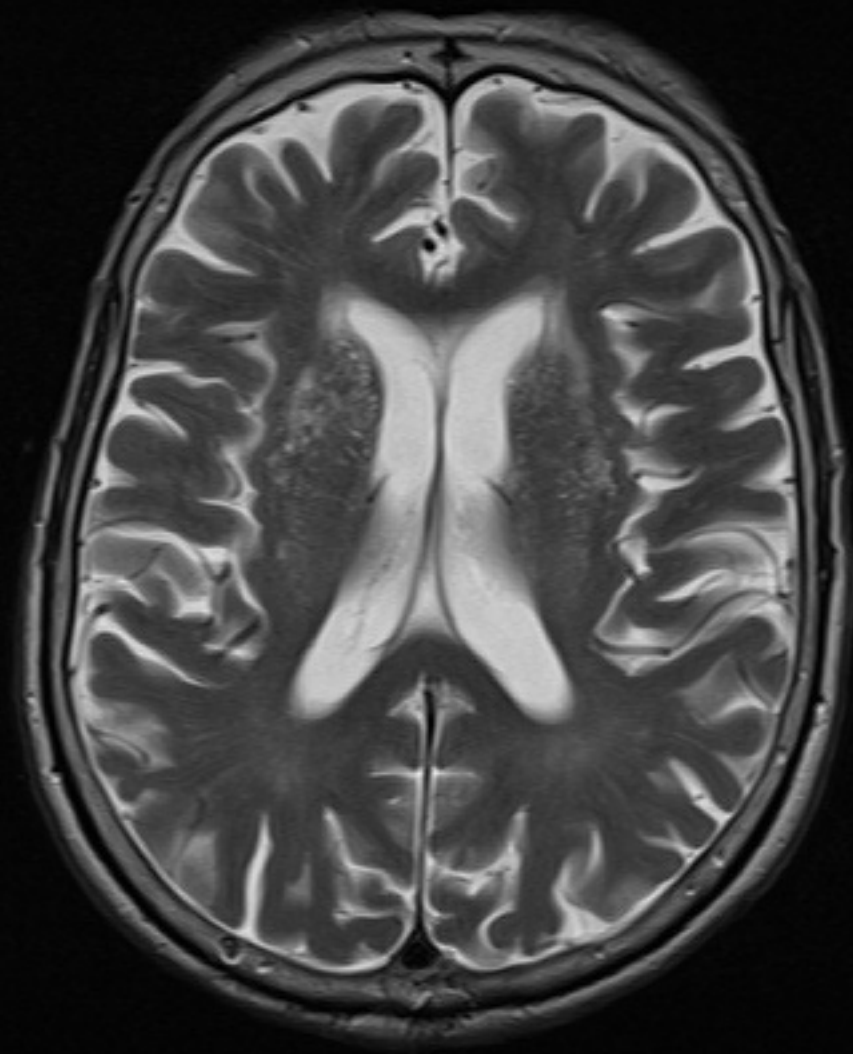

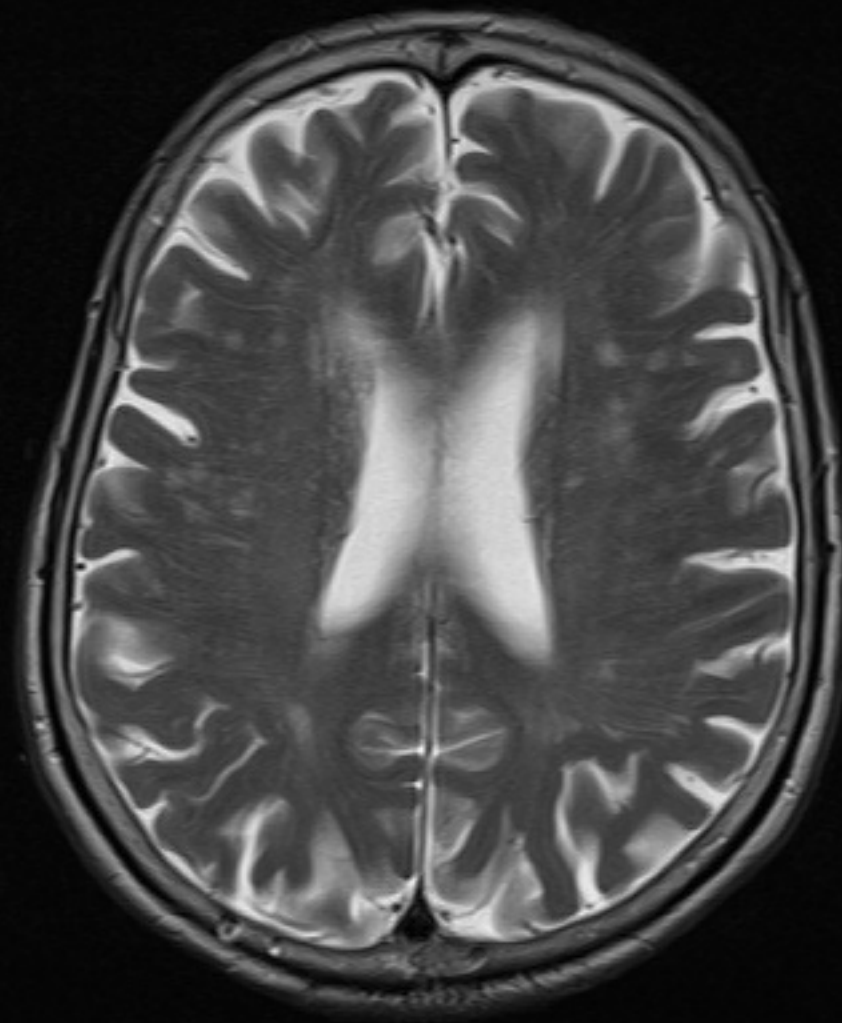

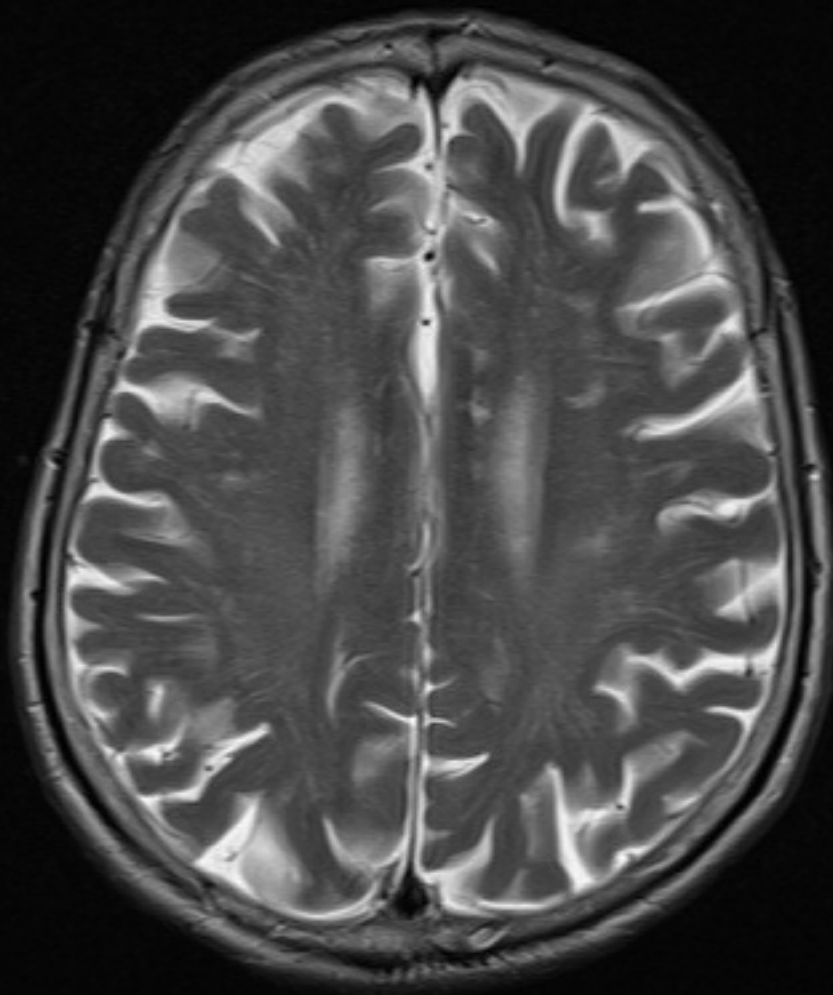

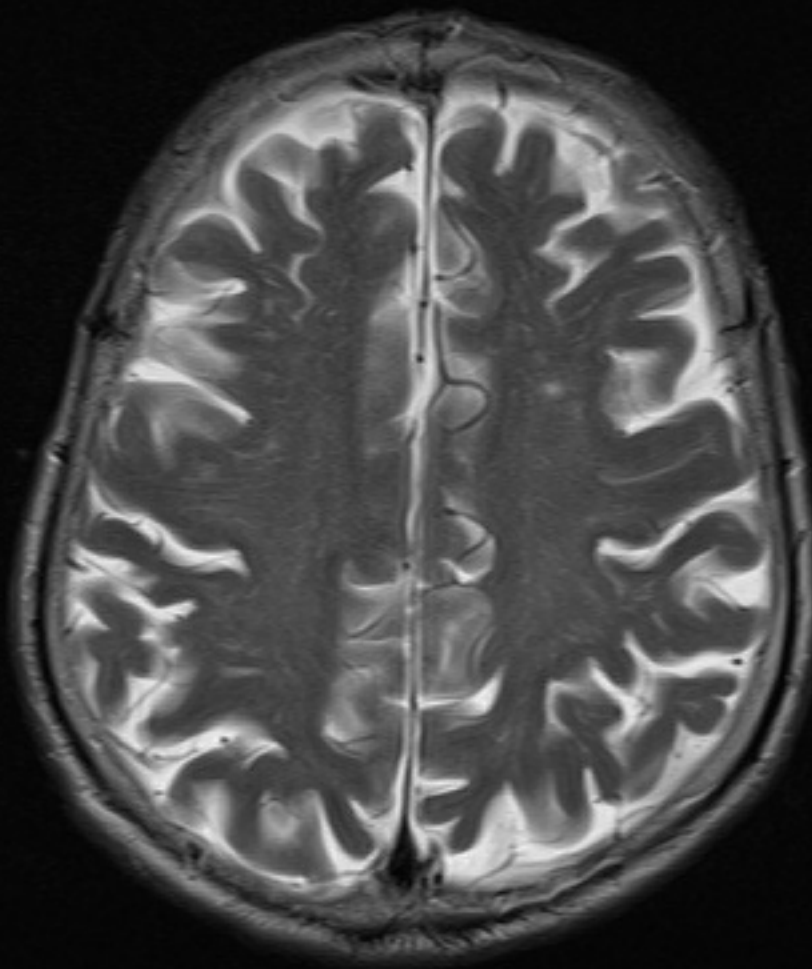

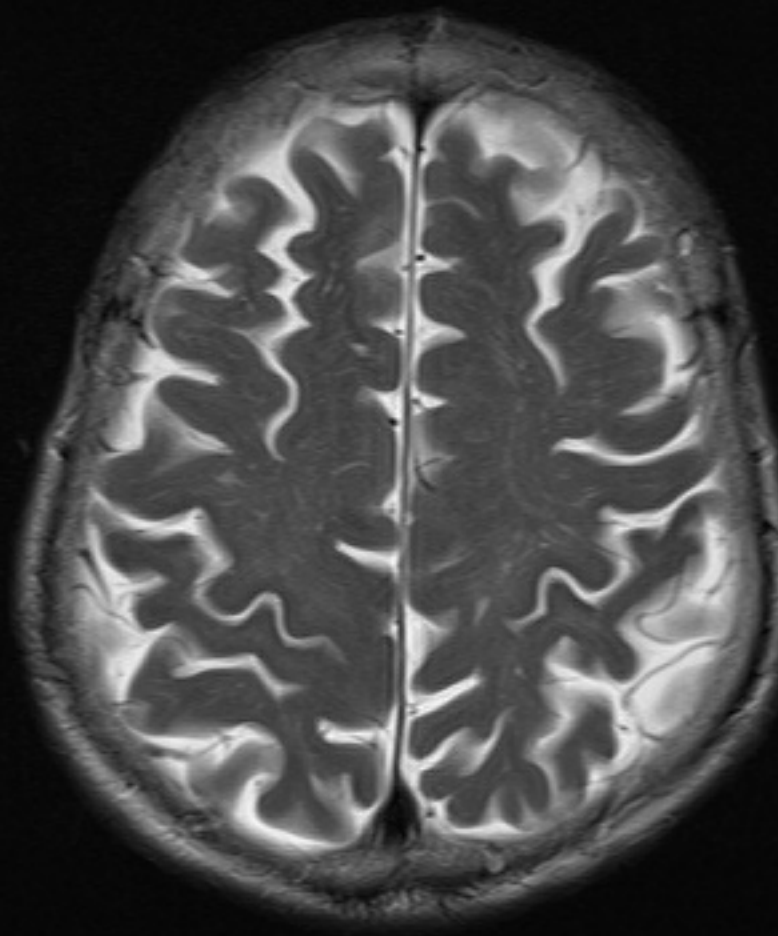

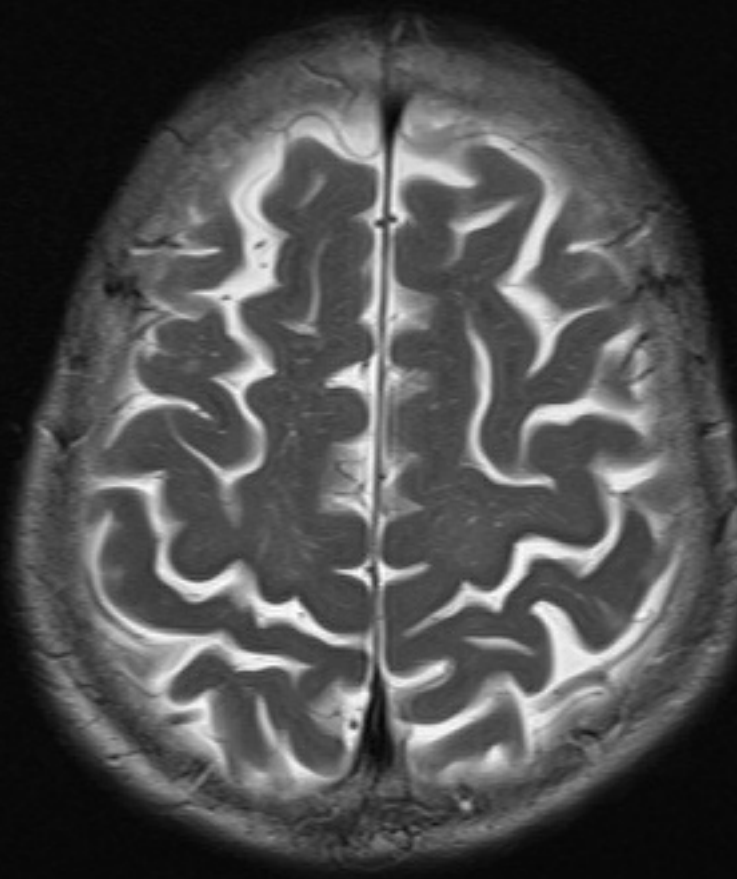

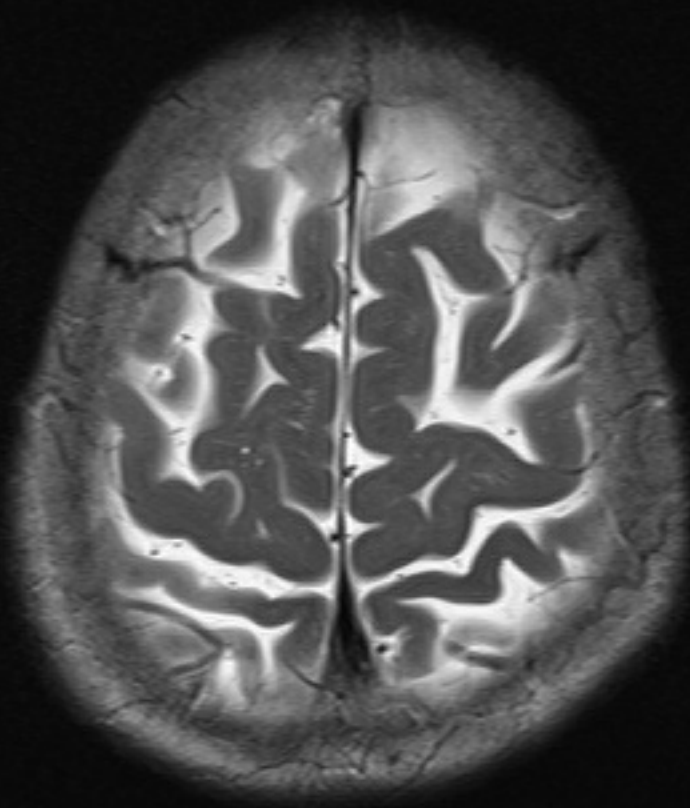



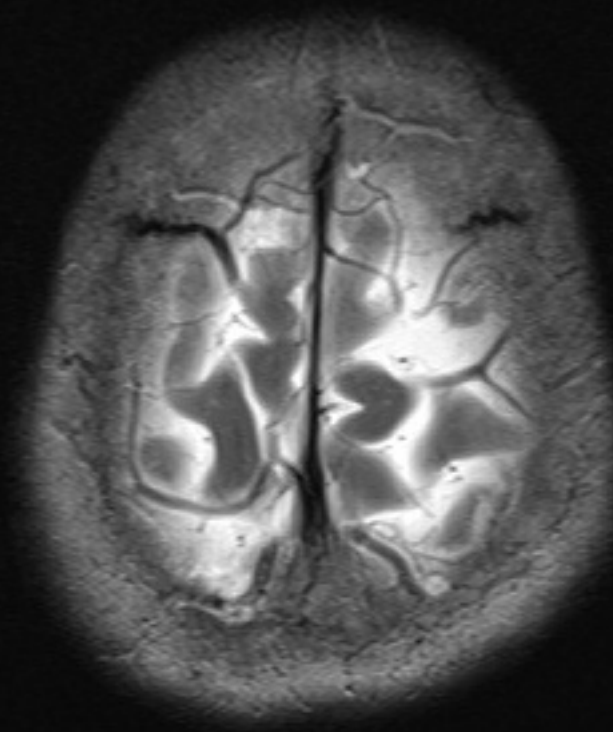

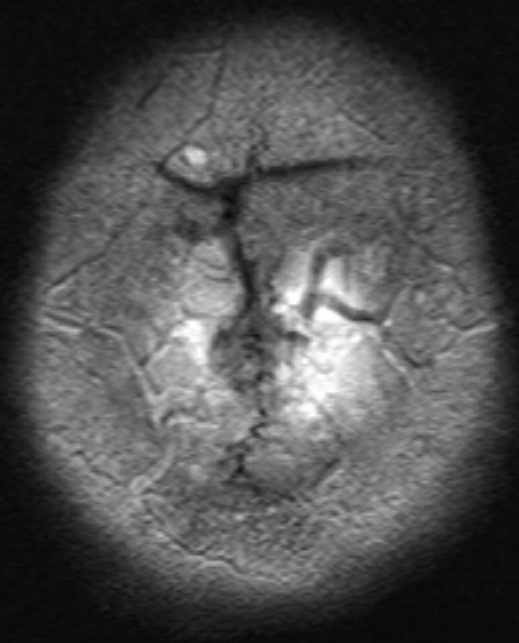

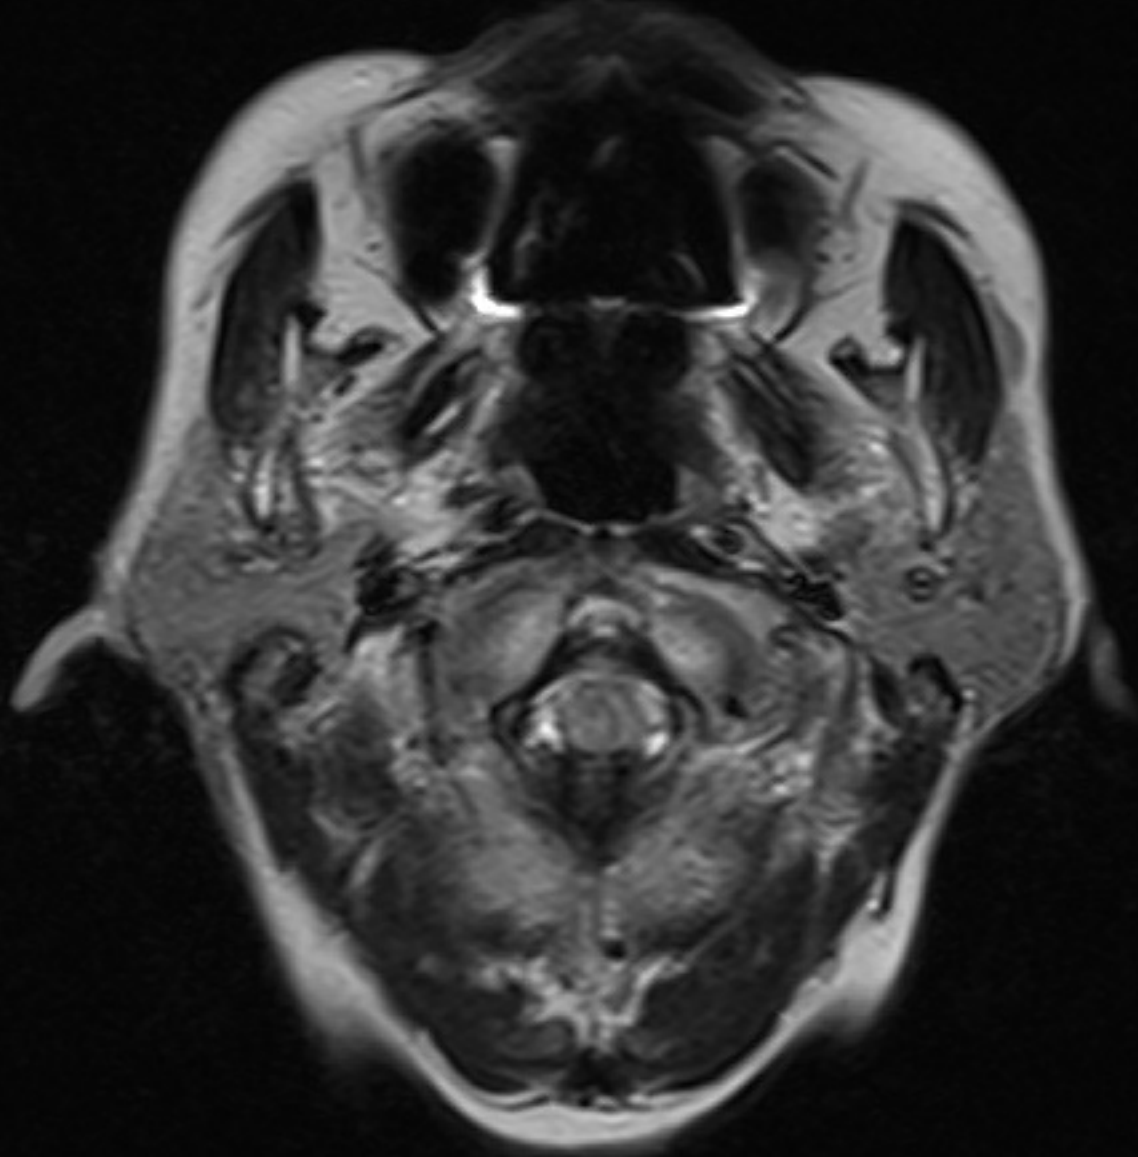

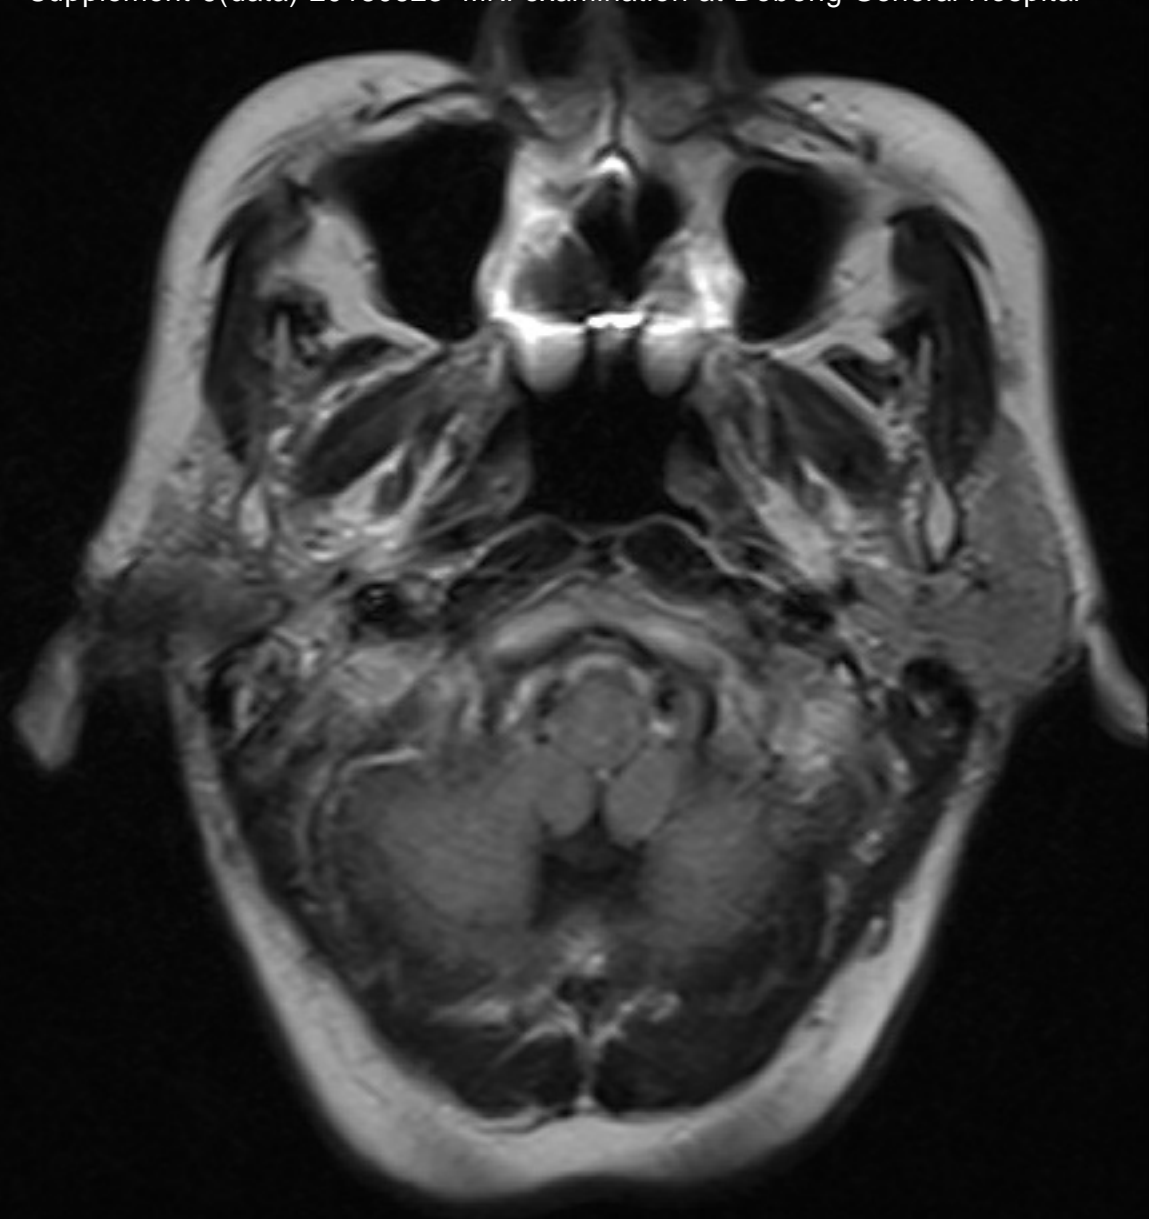

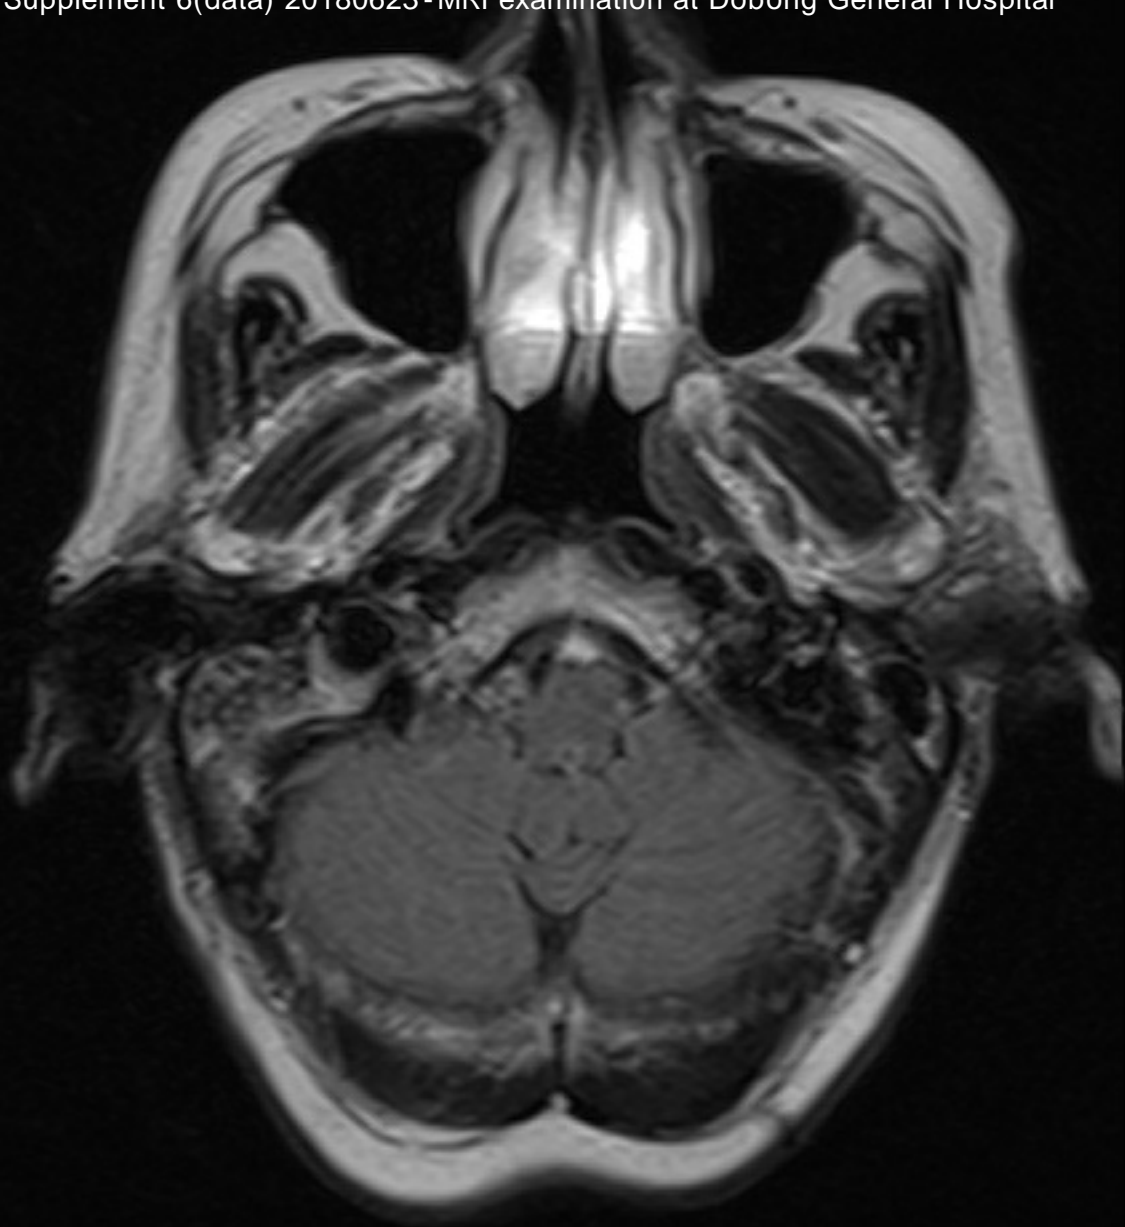

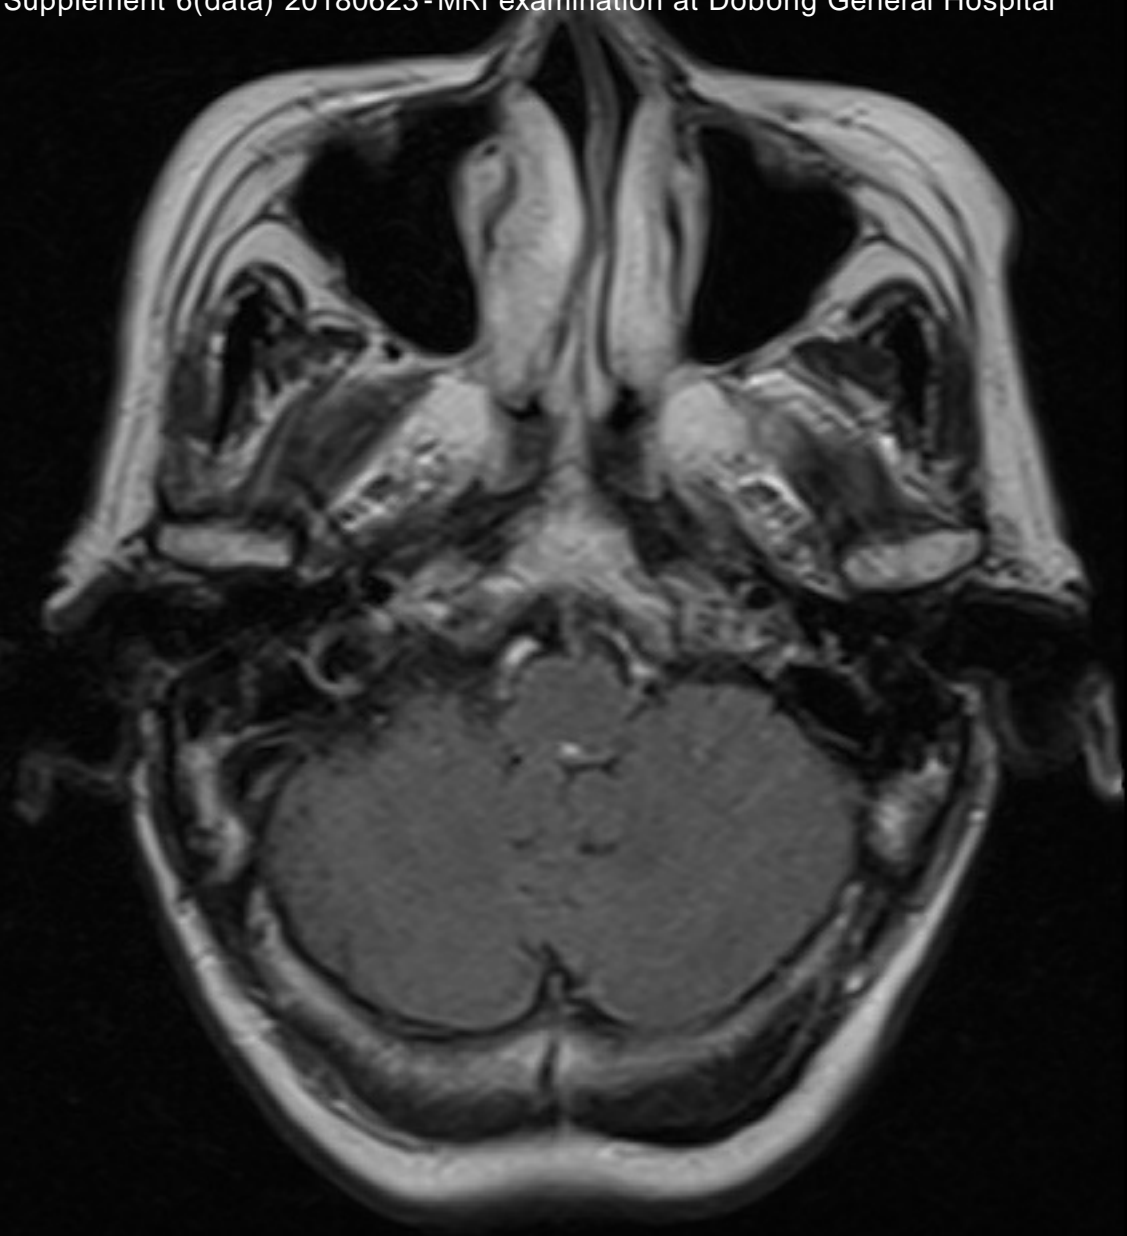

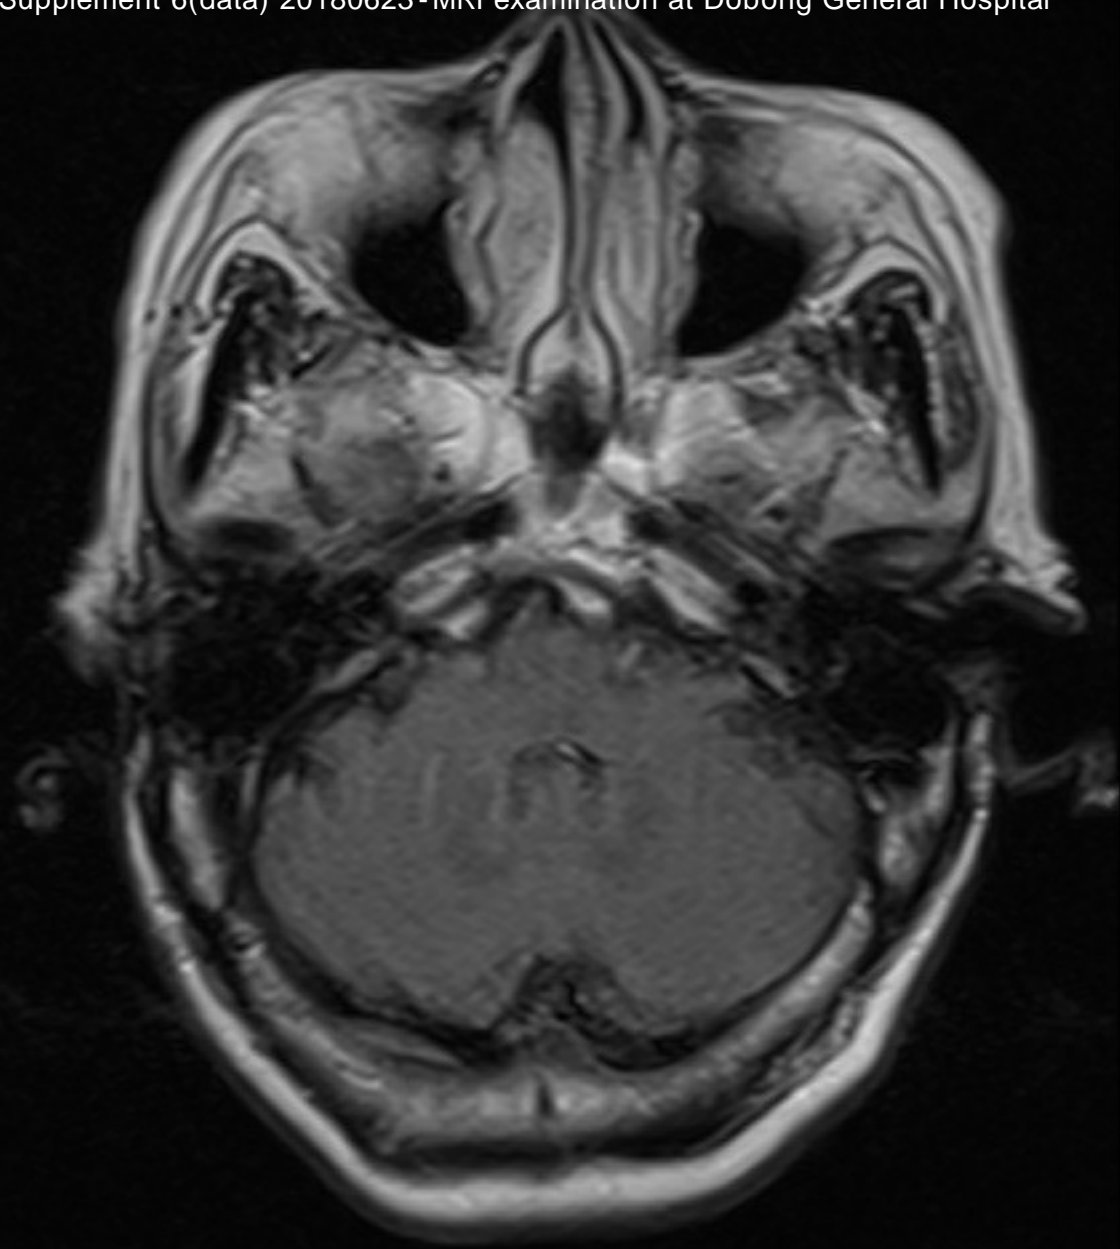

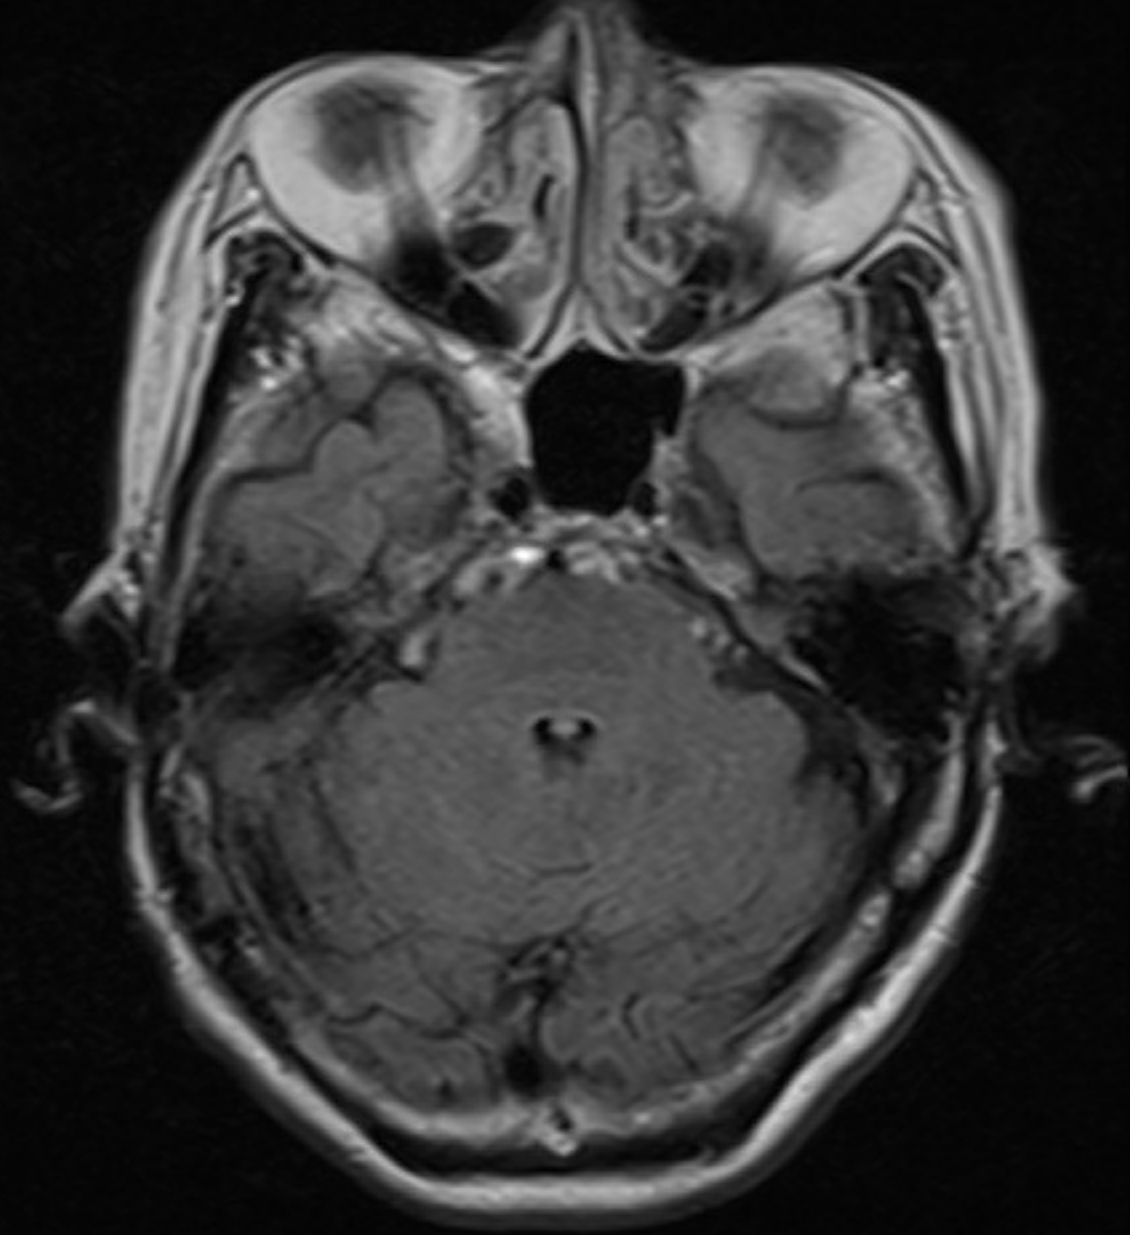



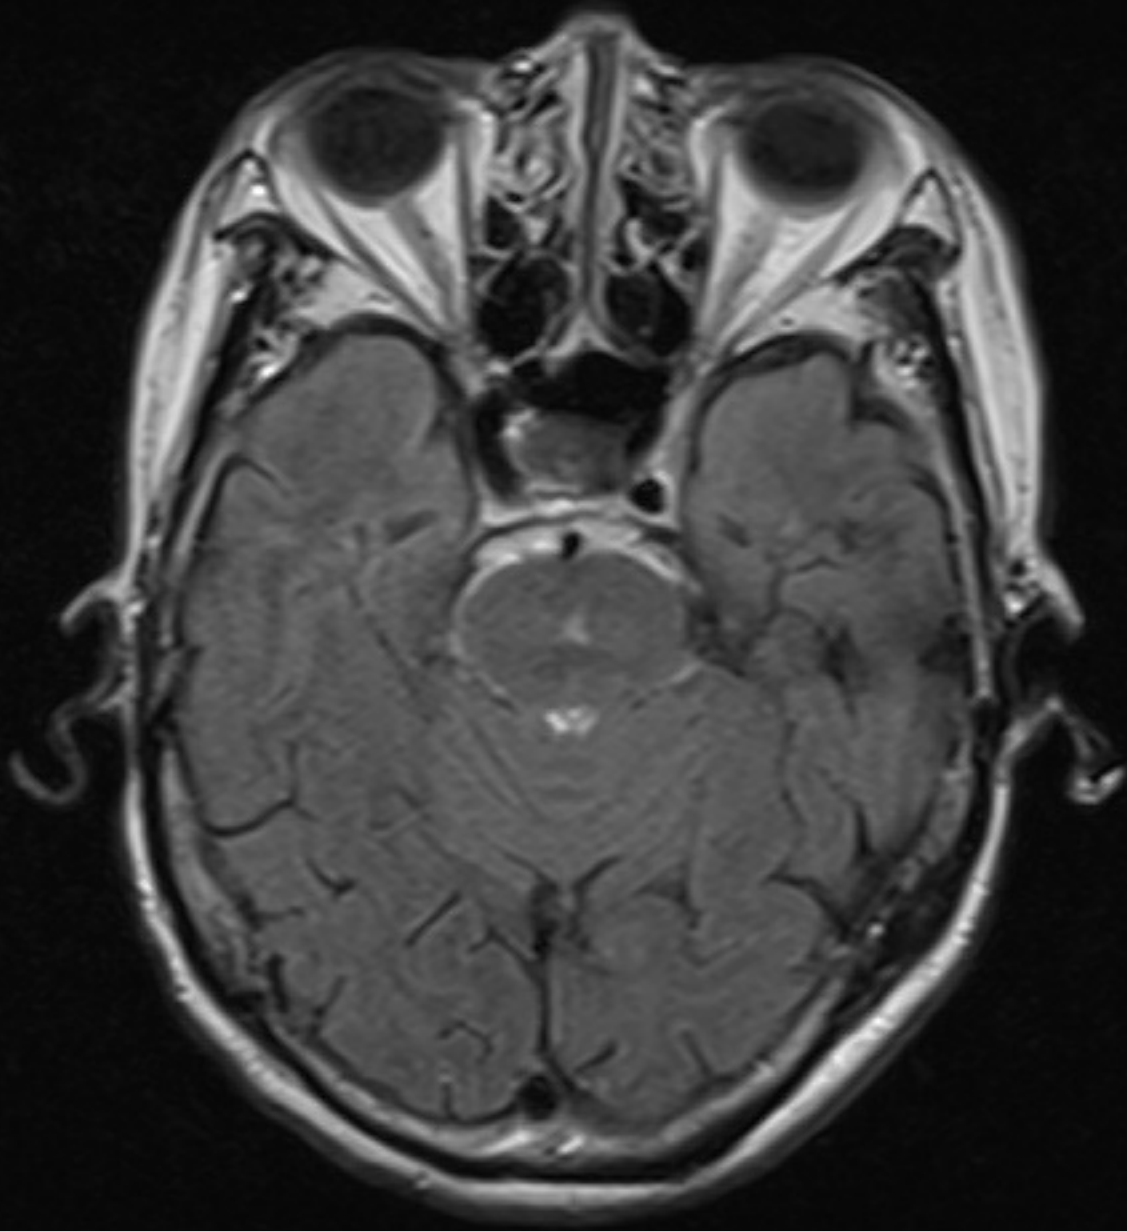

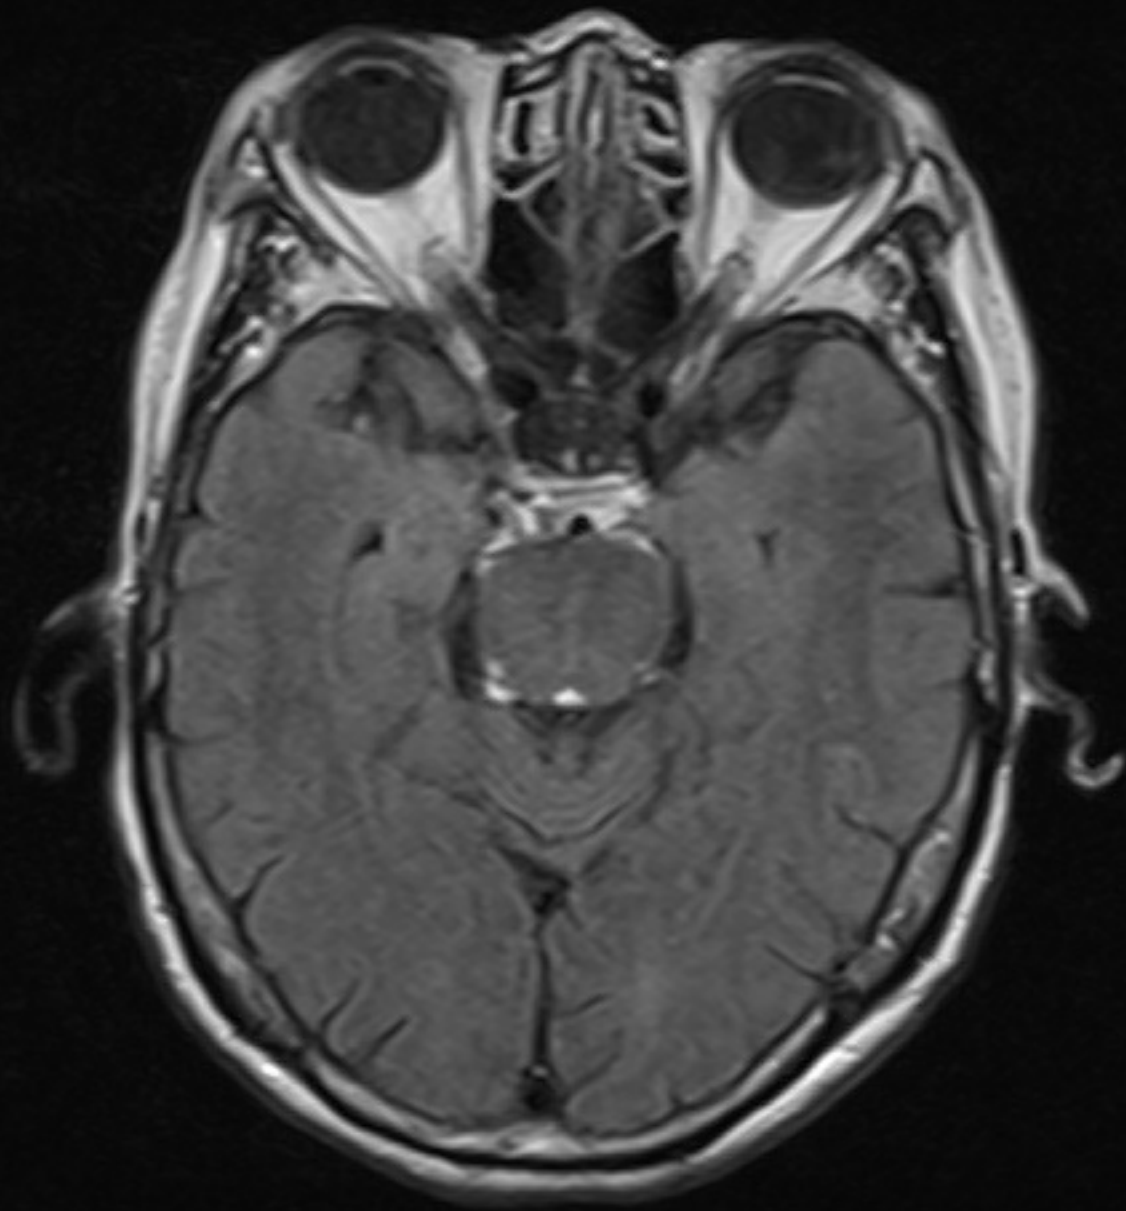

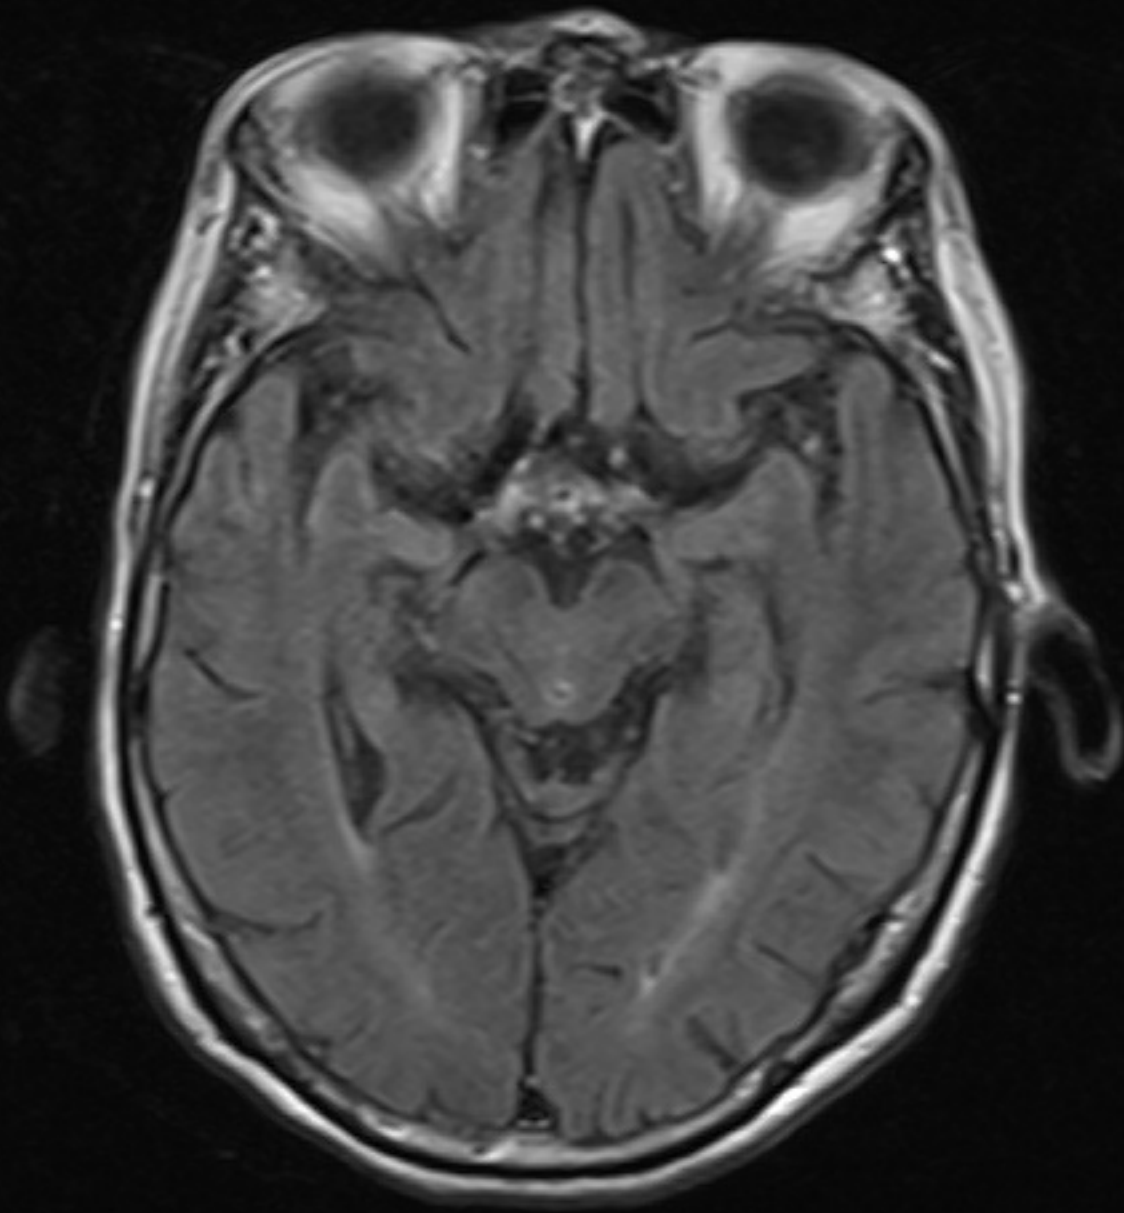

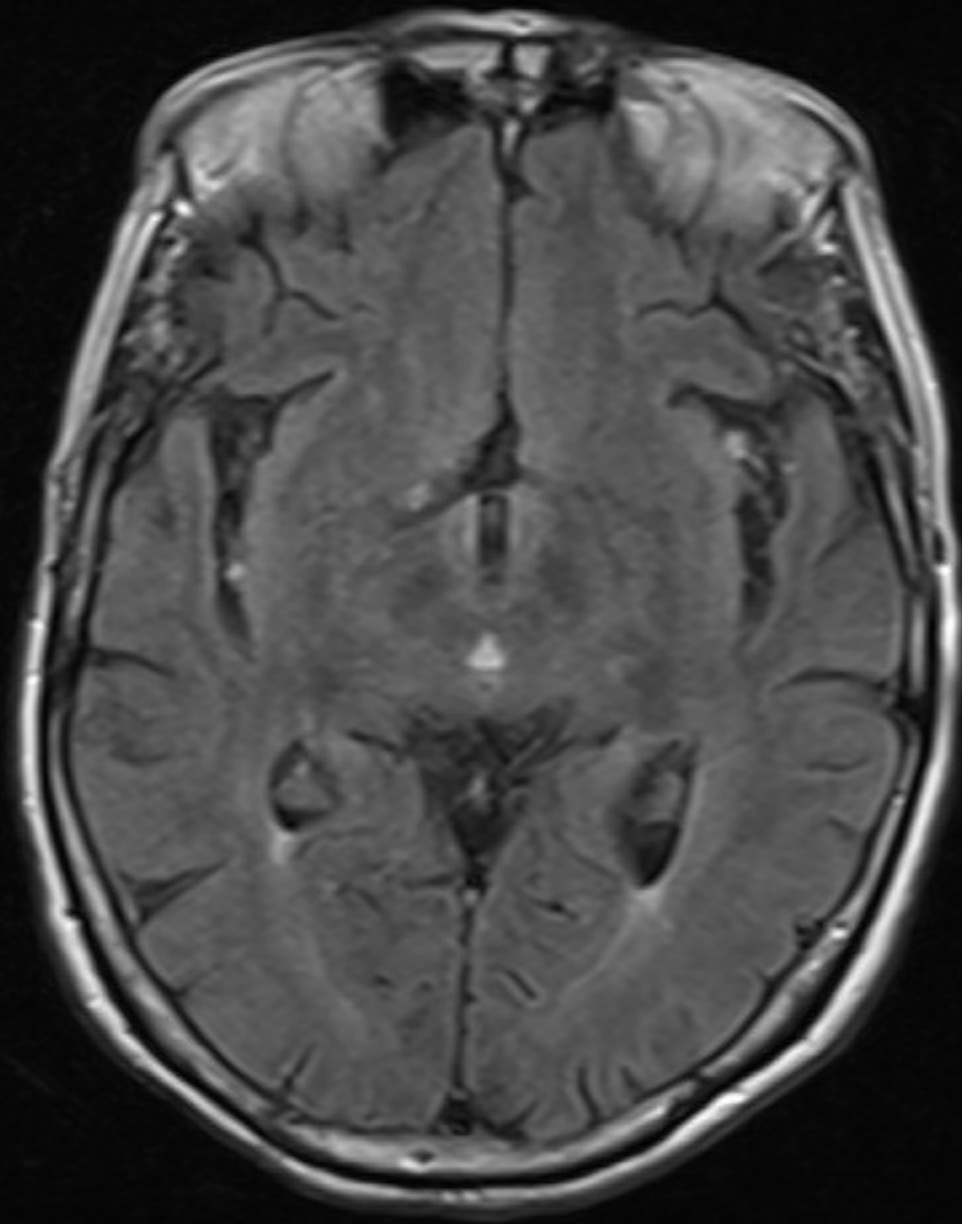

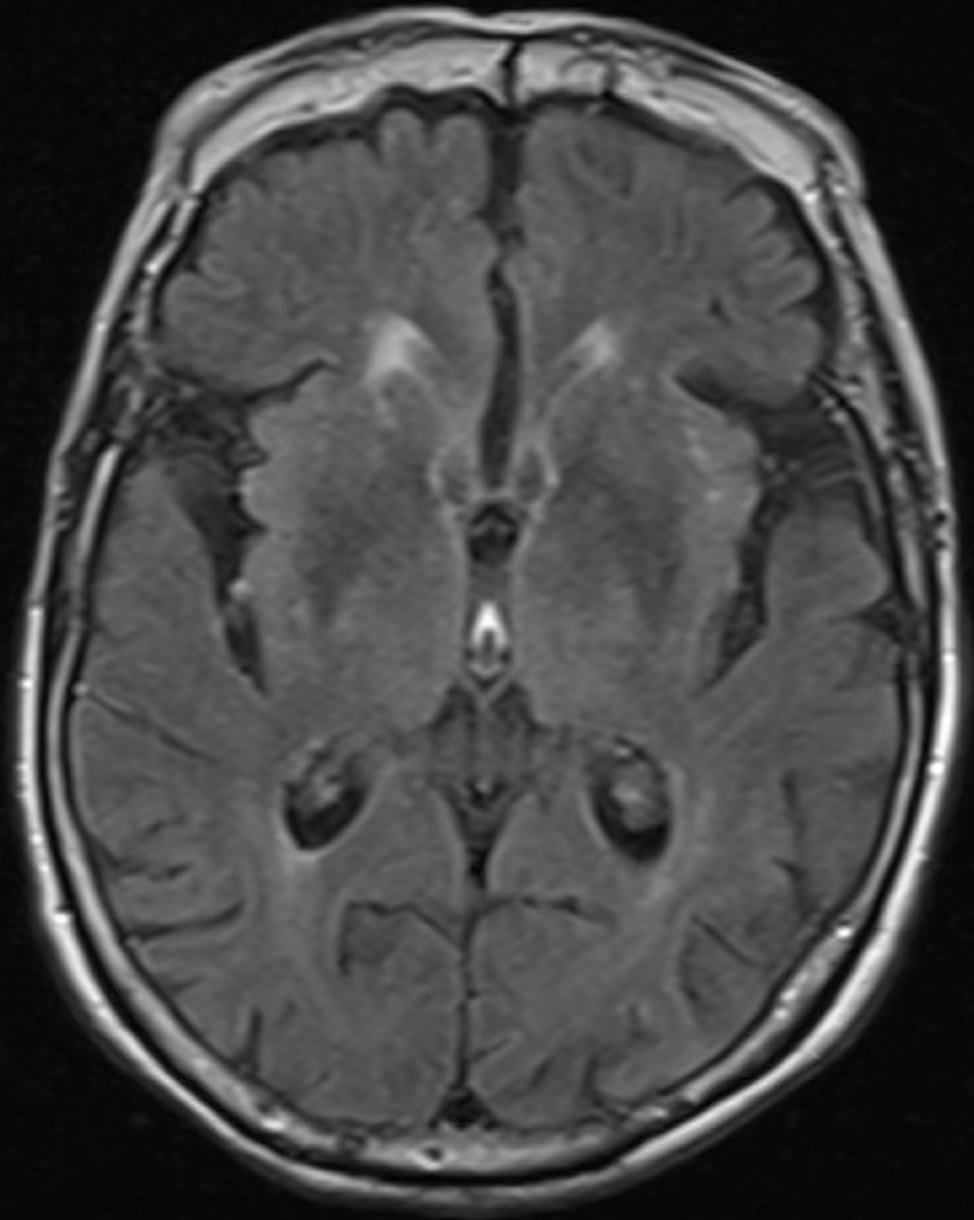

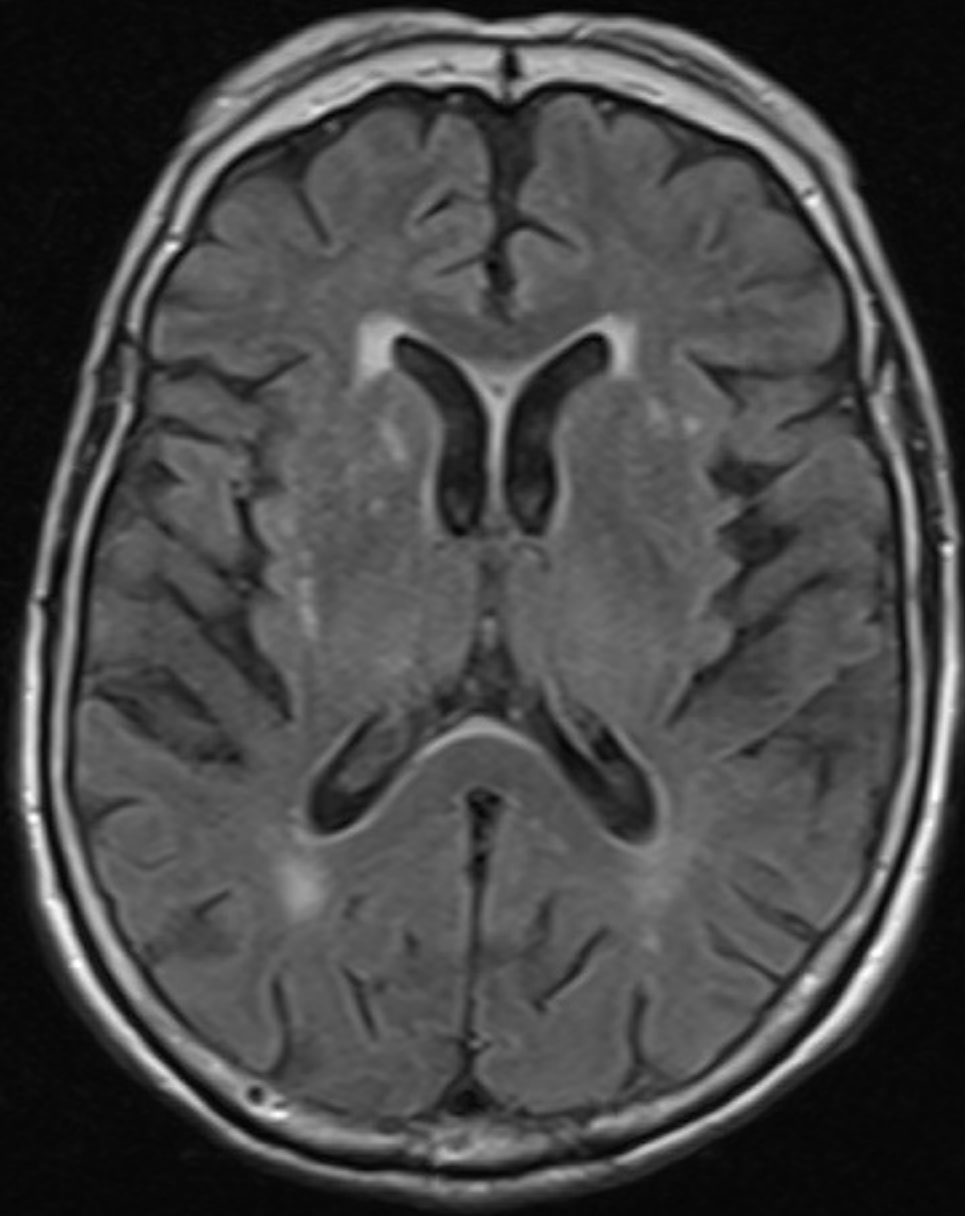

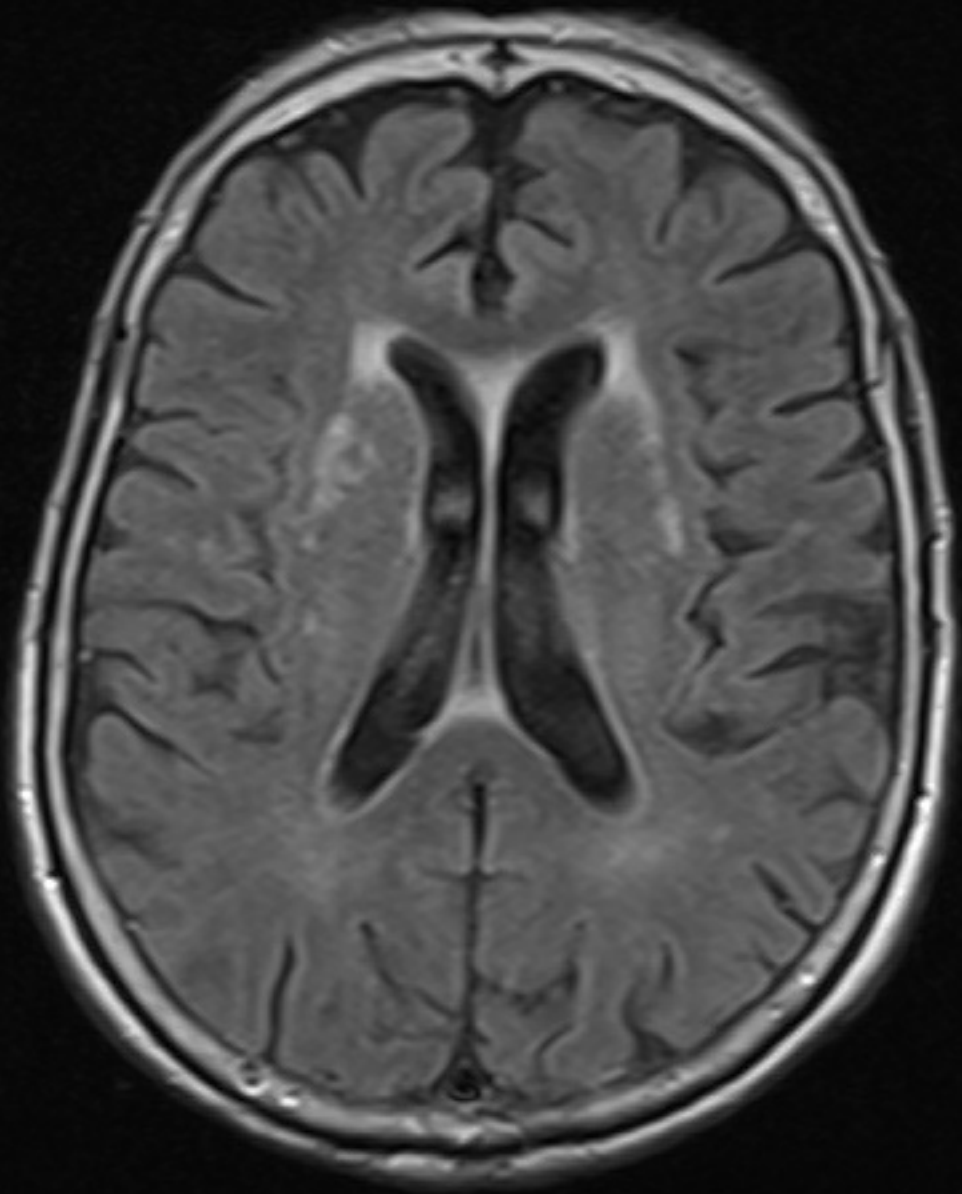

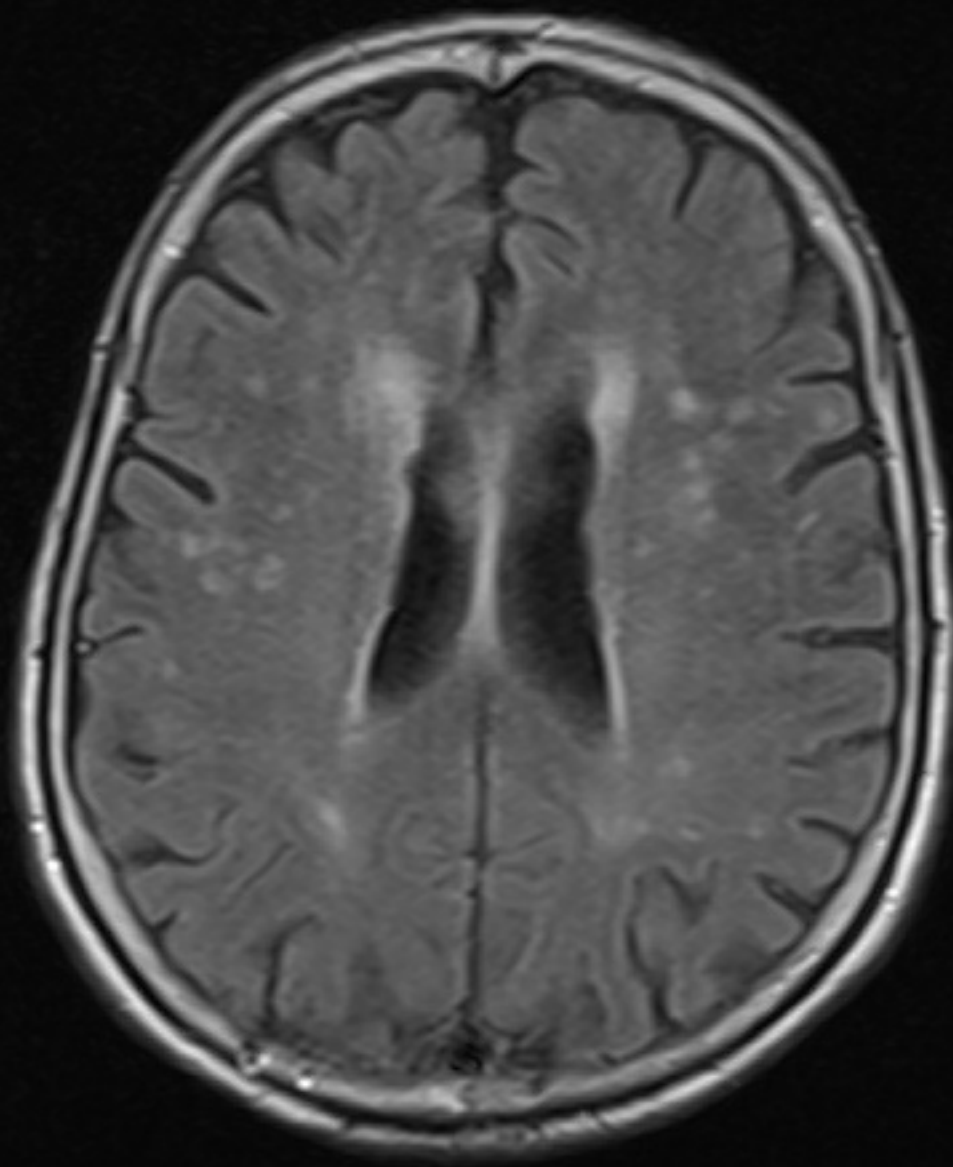



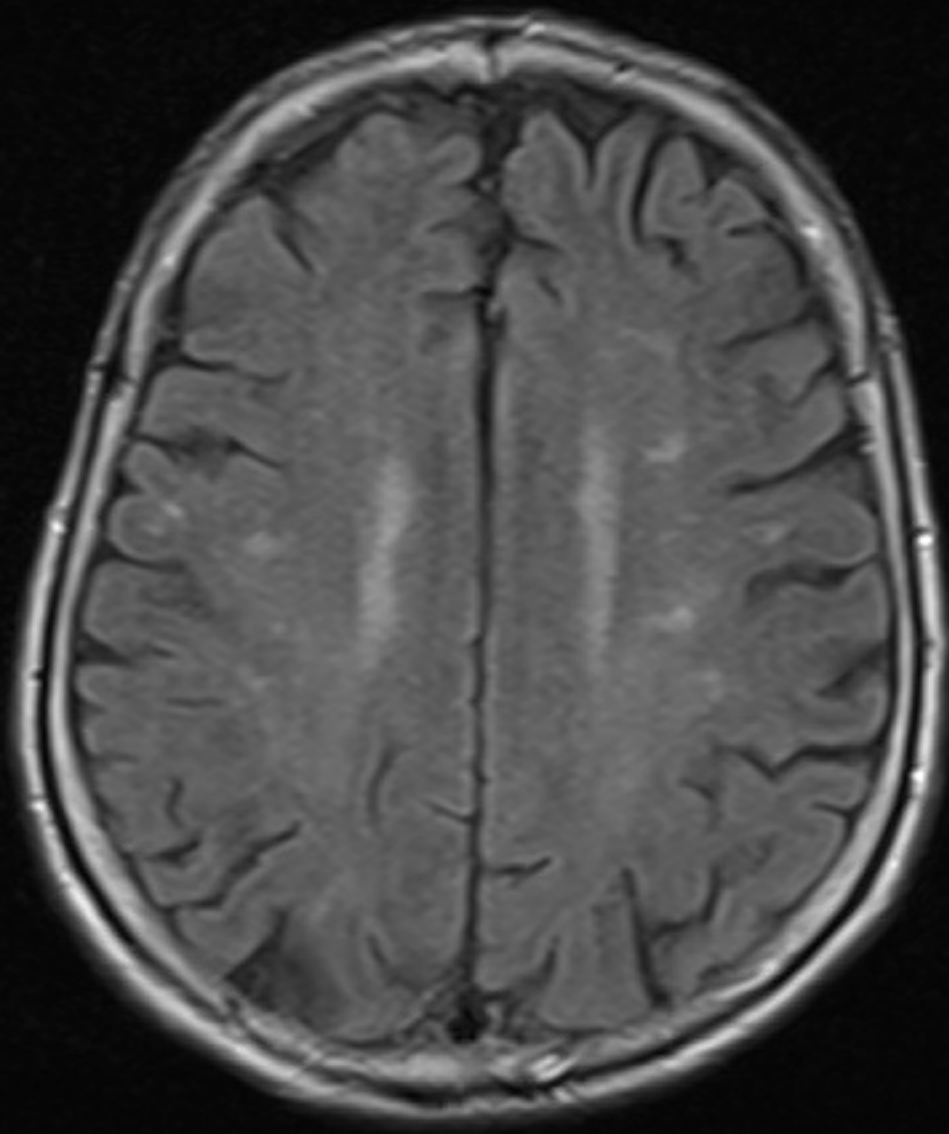

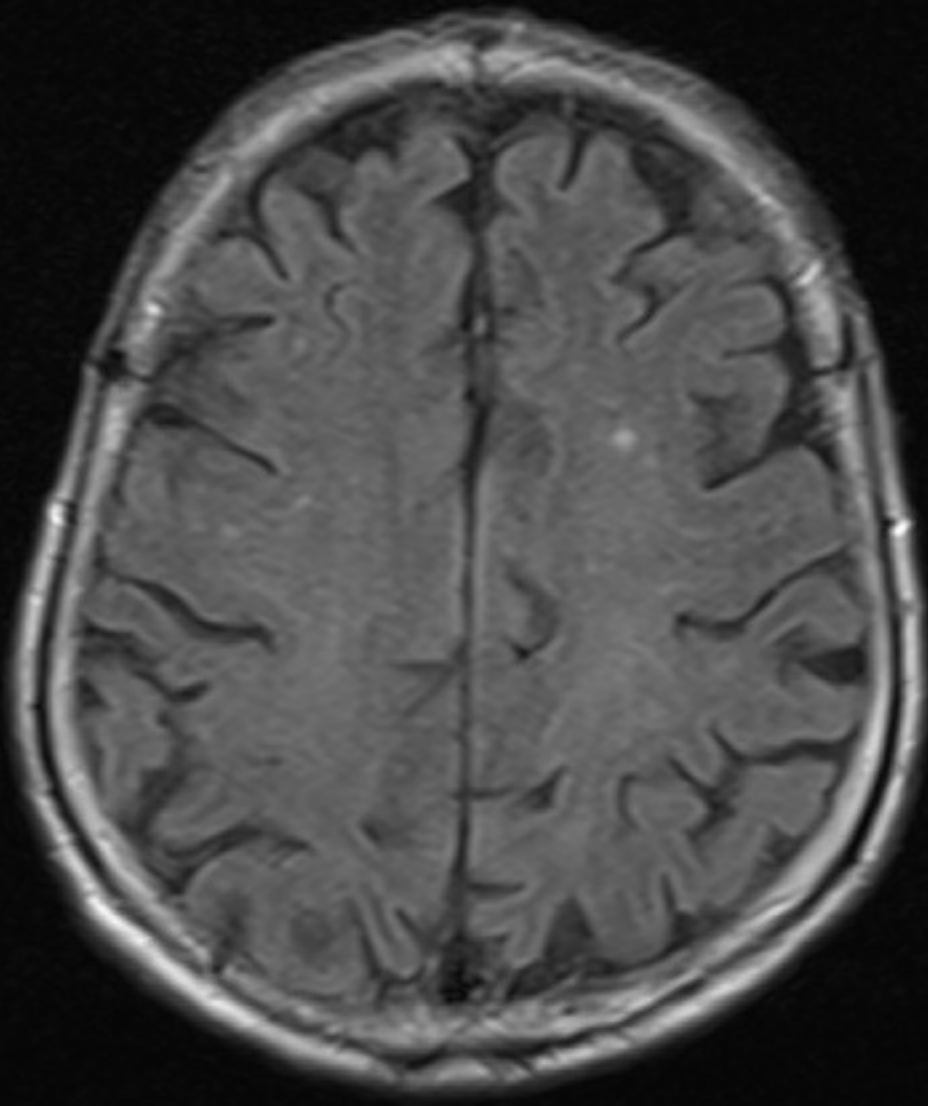

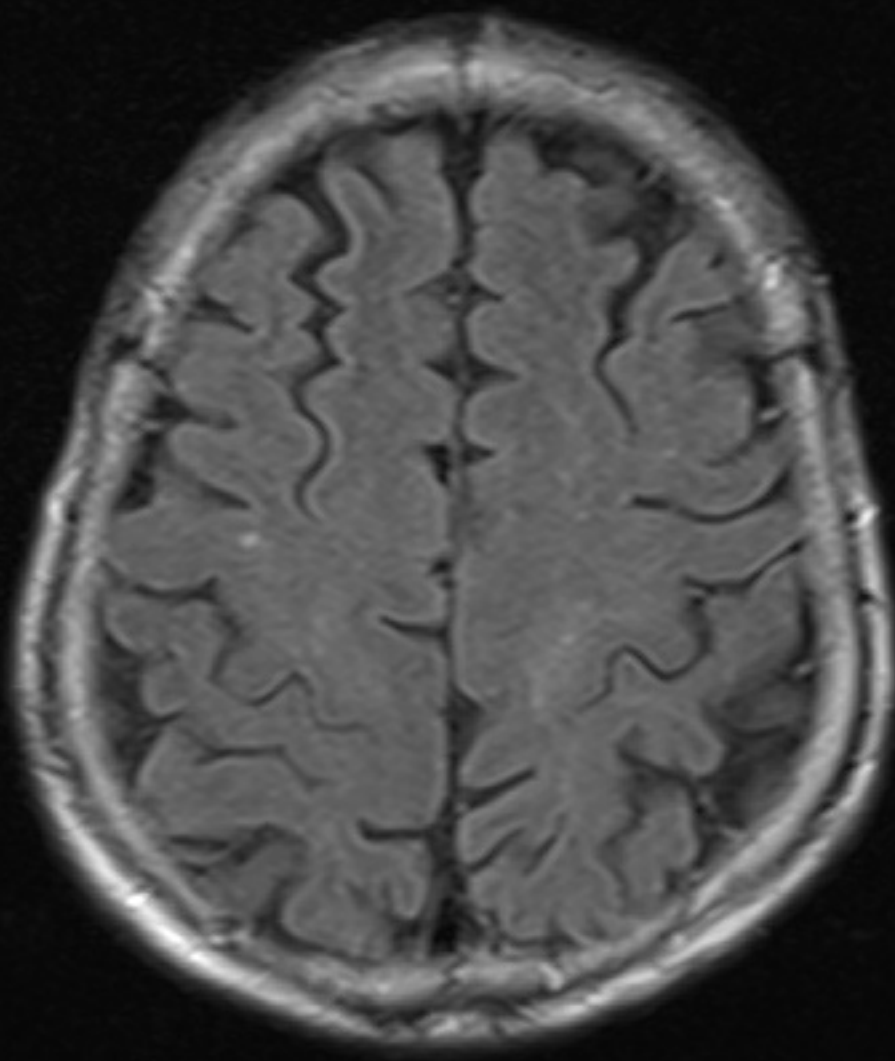

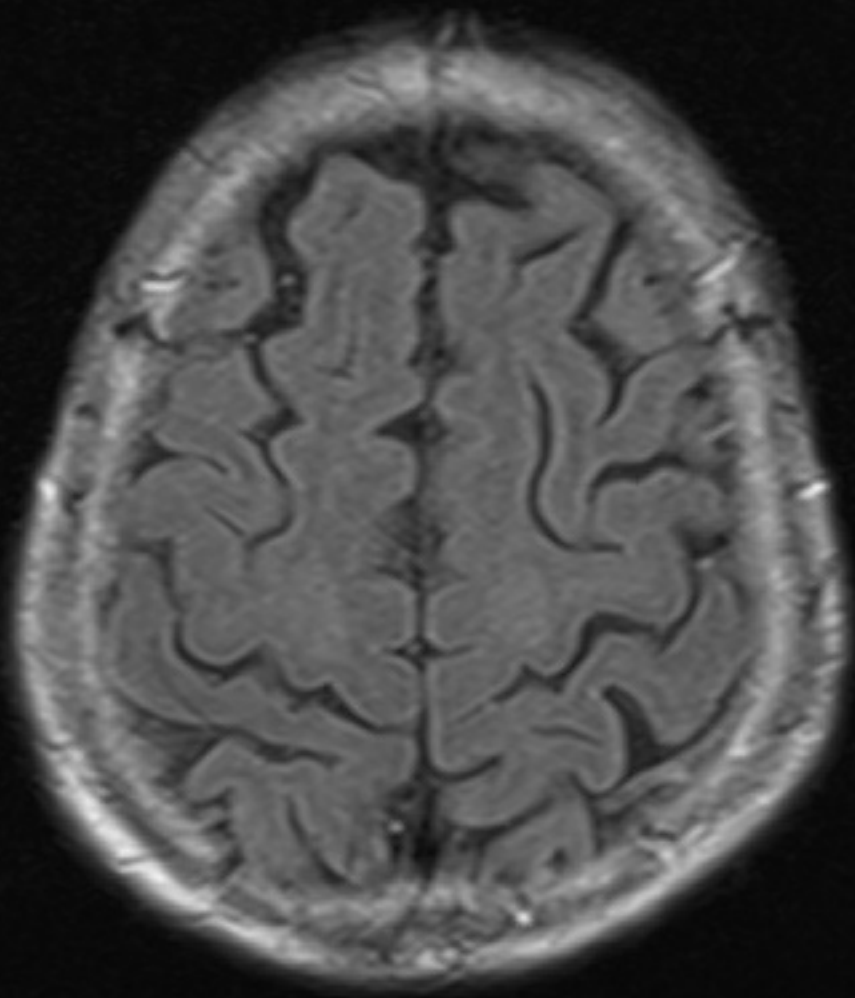

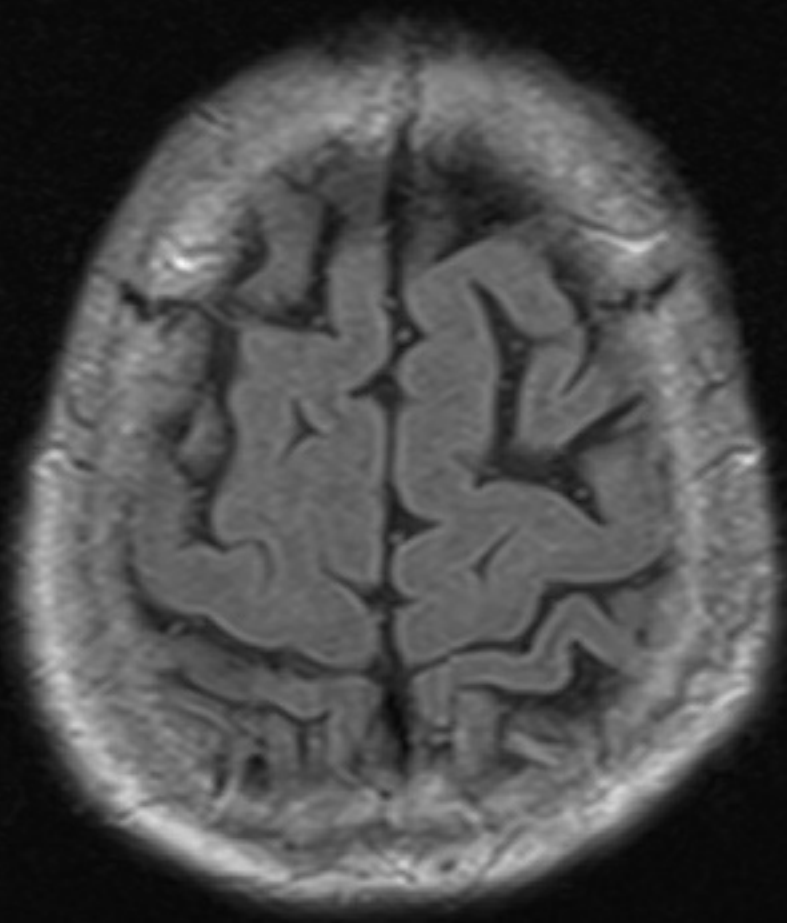

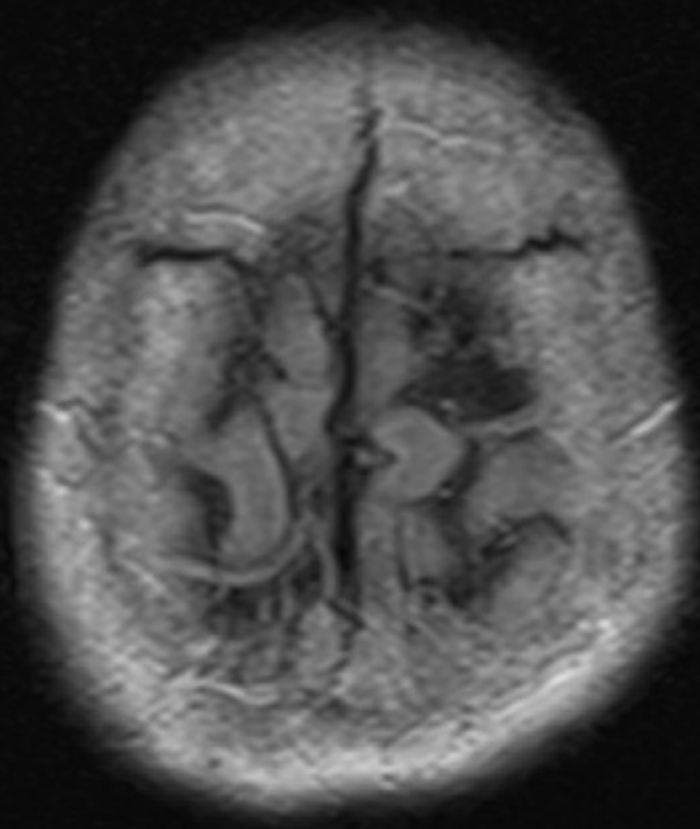

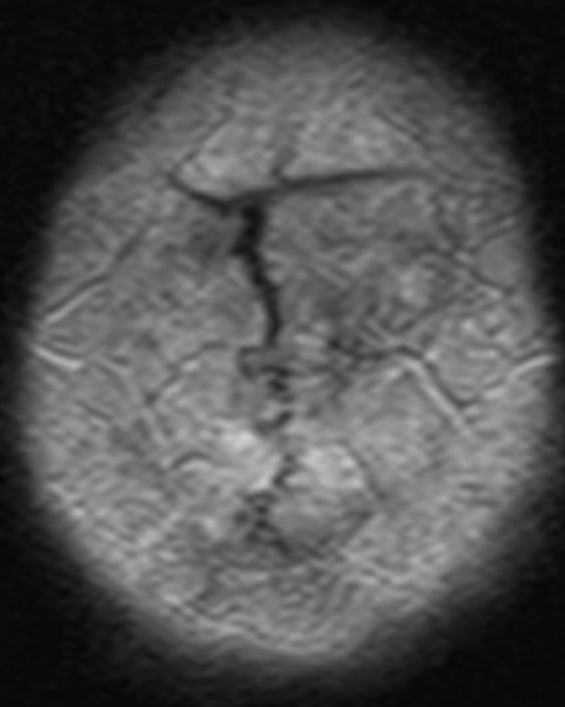

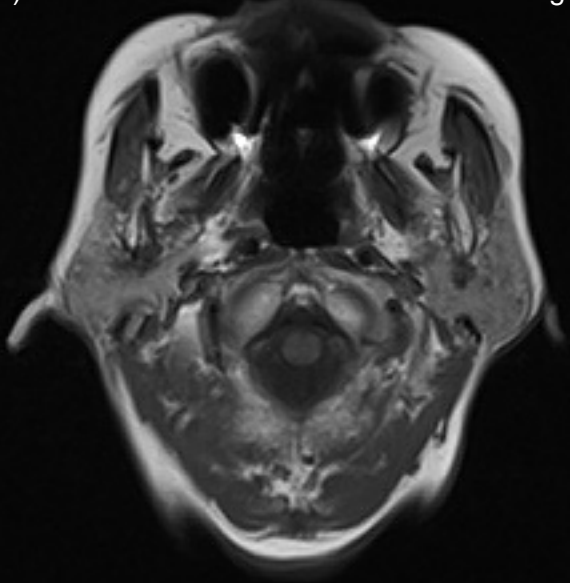



ata) 20180623 - MRI examination at Dobong C

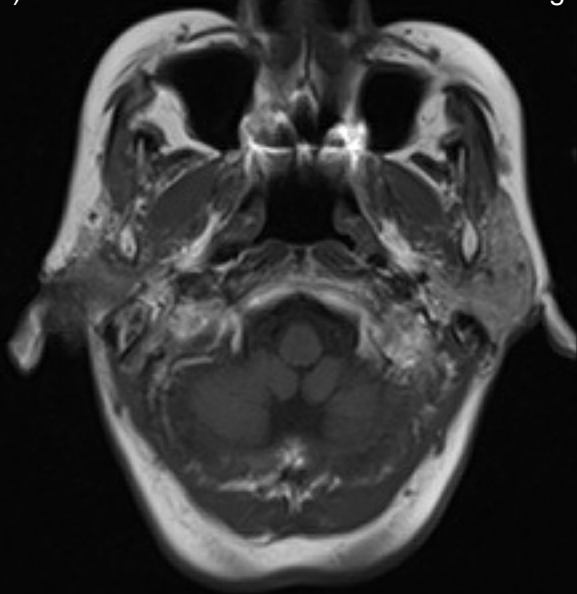

ata) 20180623 - MRI examination at Dobong C

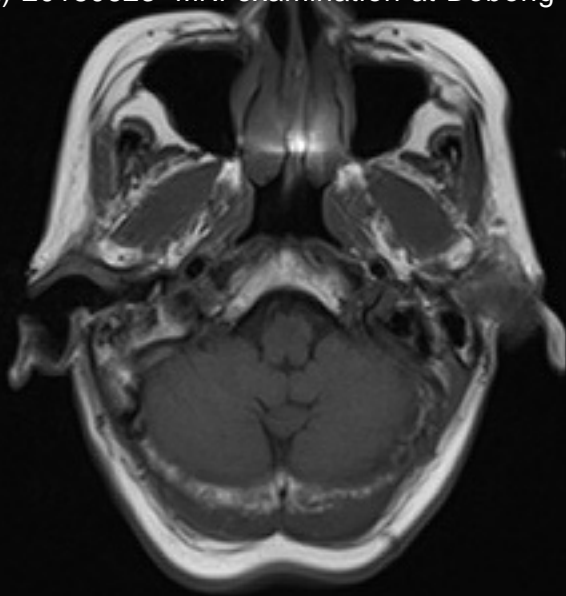

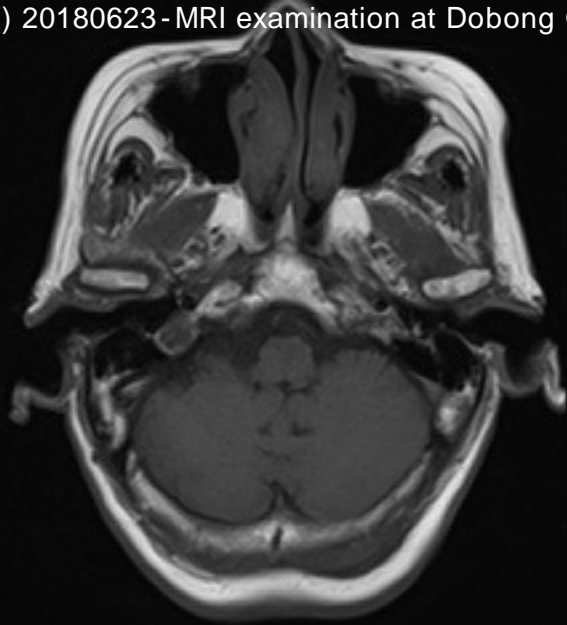

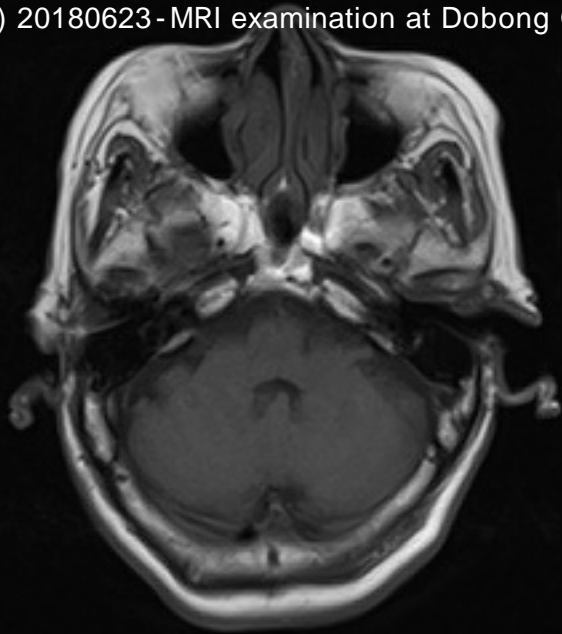

ata) 20180623 - MRI examination at Dobong C

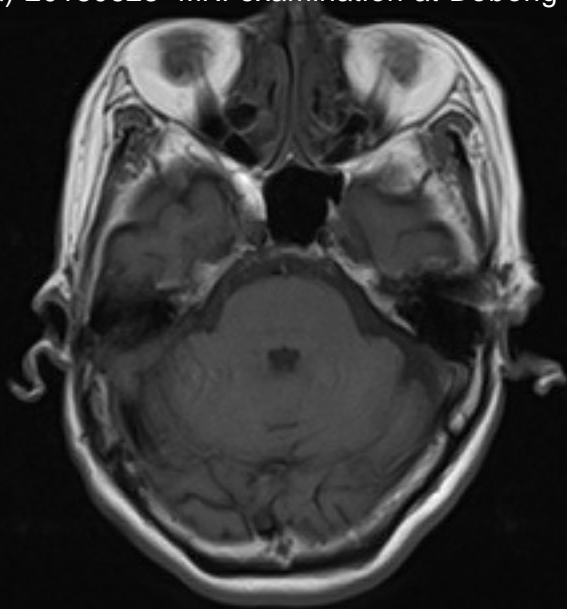

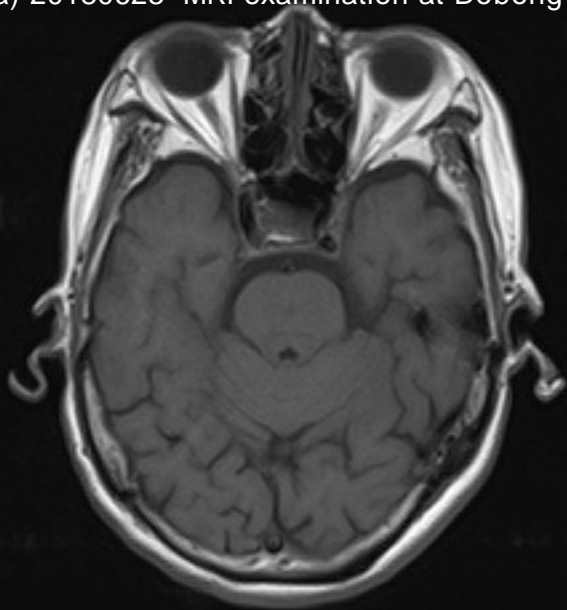

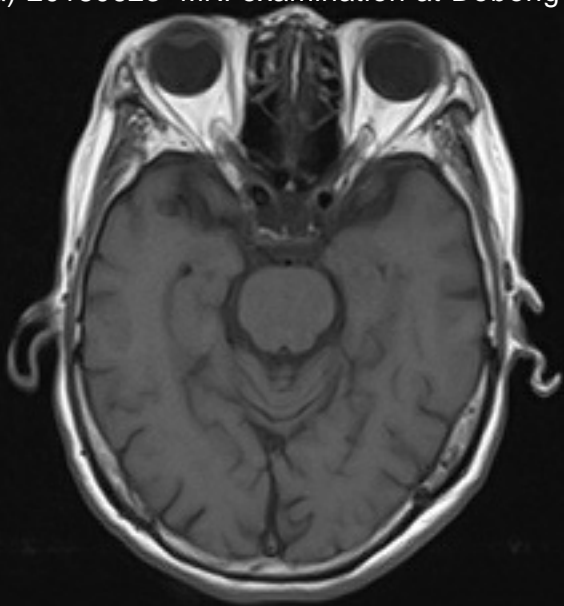

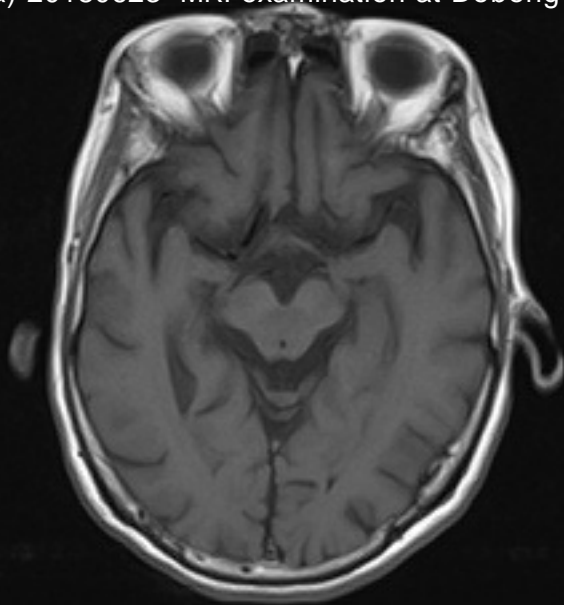



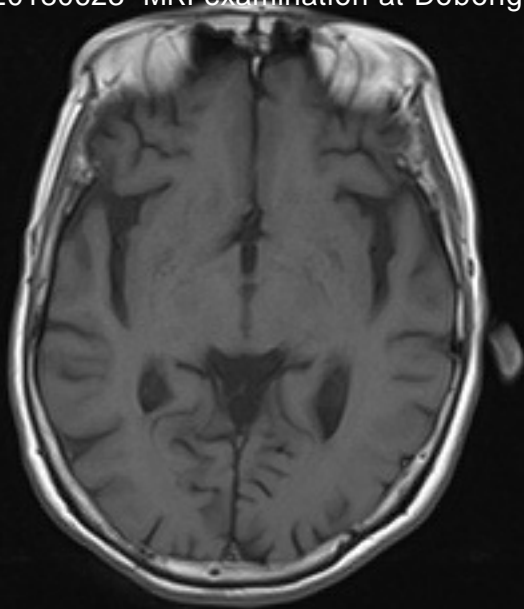

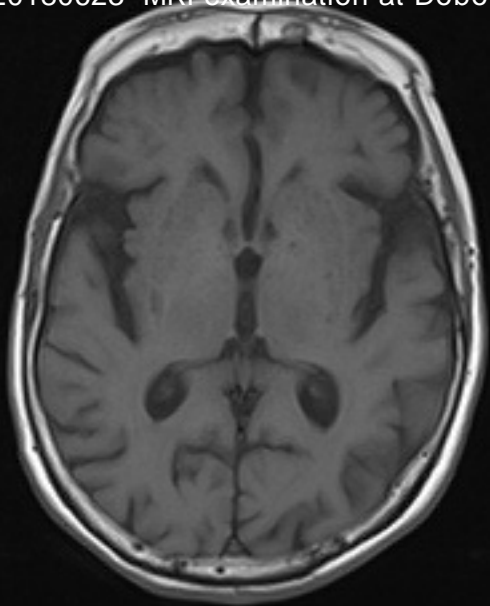

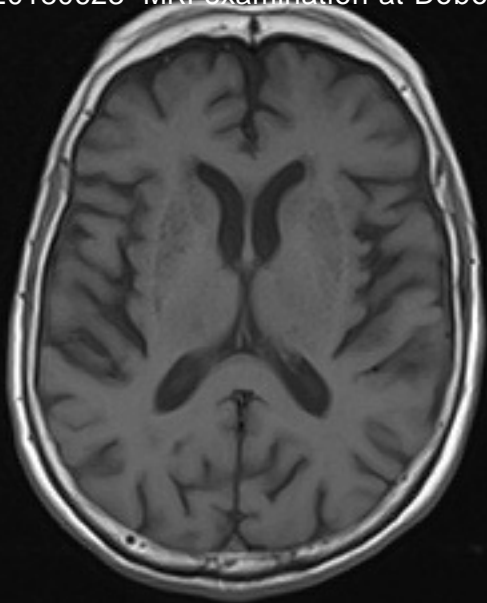

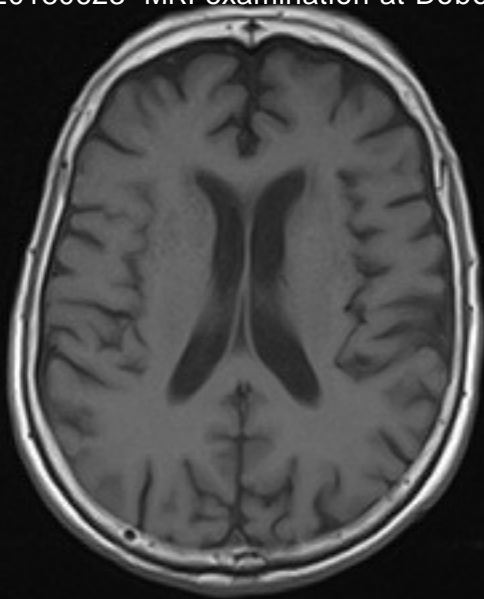

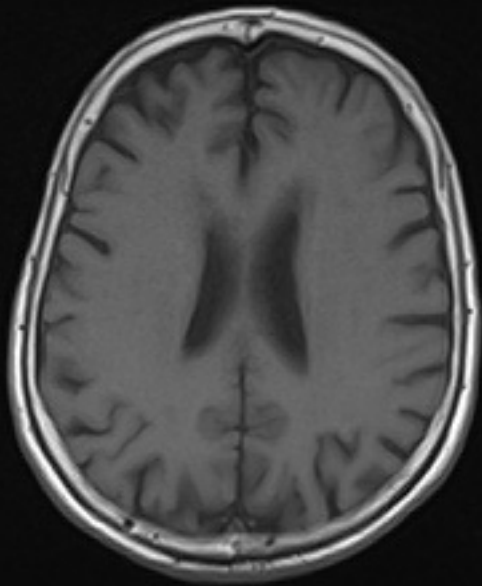

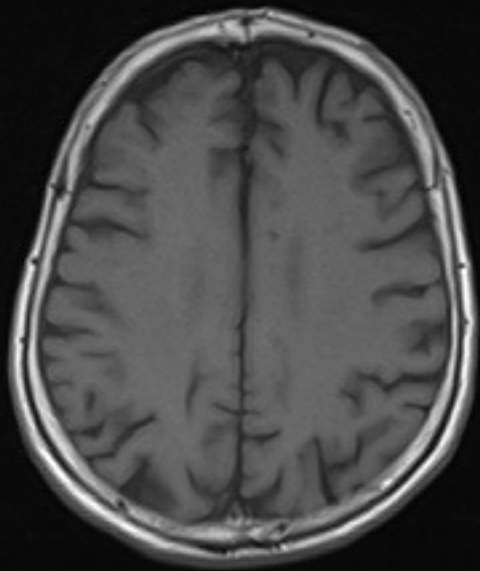

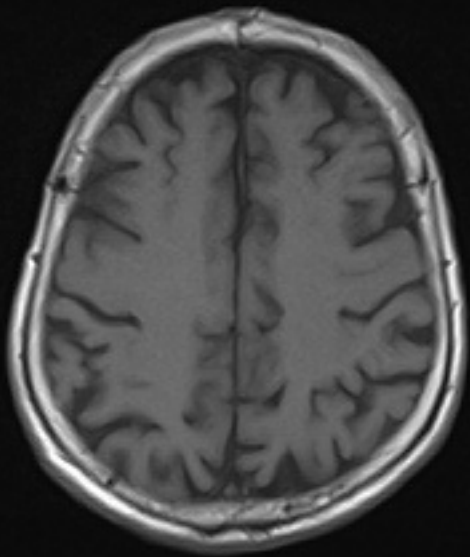

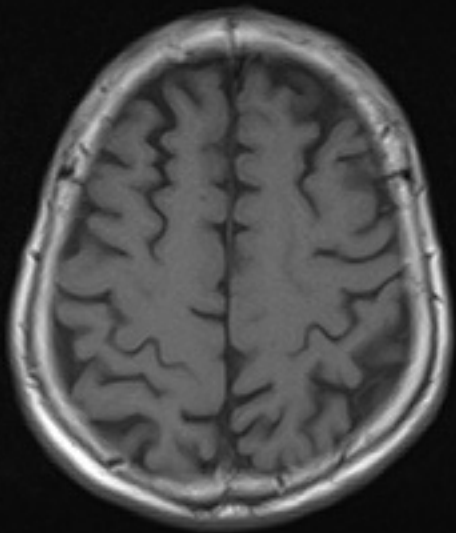



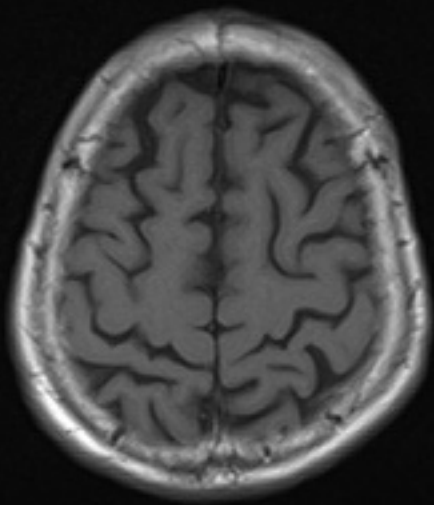

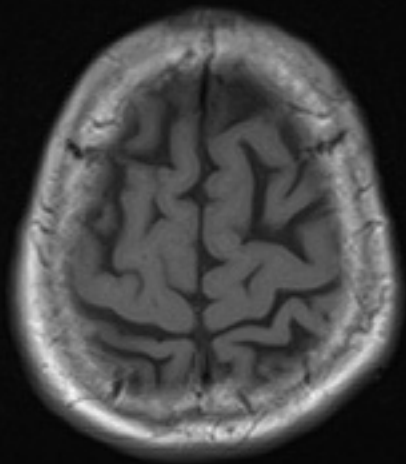

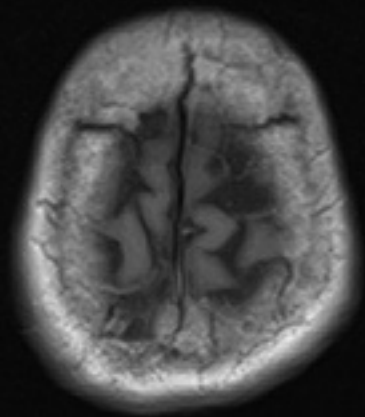

ata) 20180623 - MRI examination at Dobong C

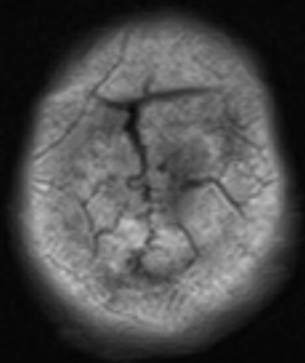

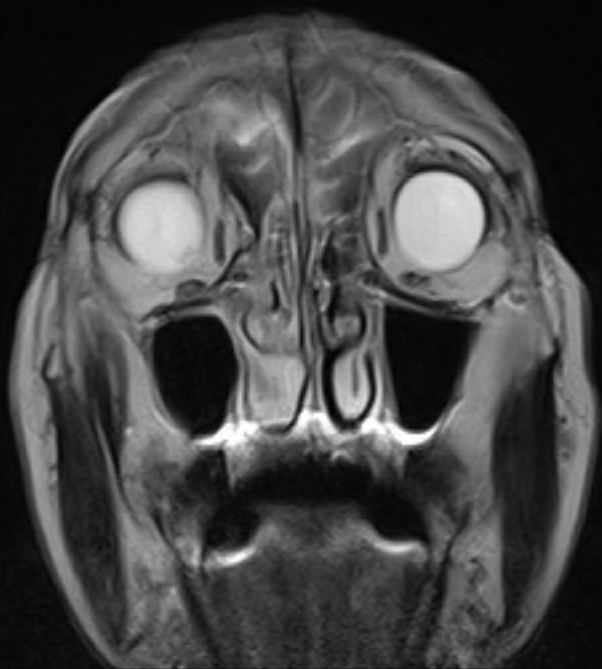

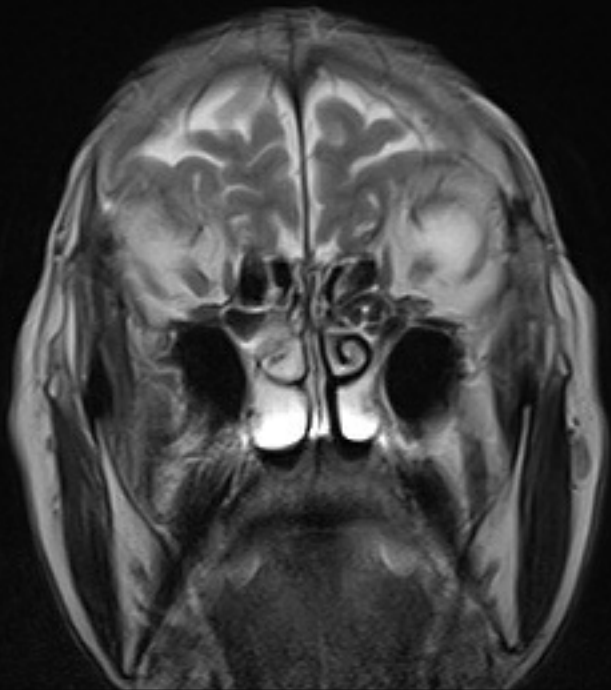

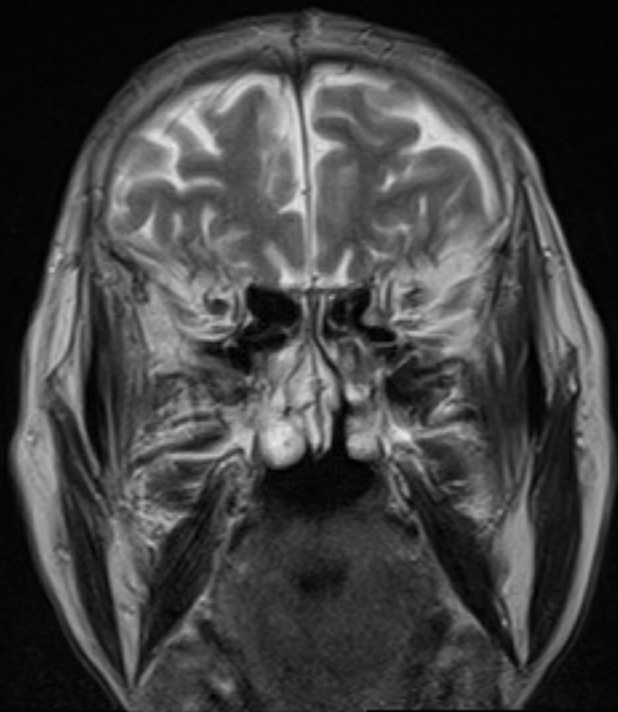

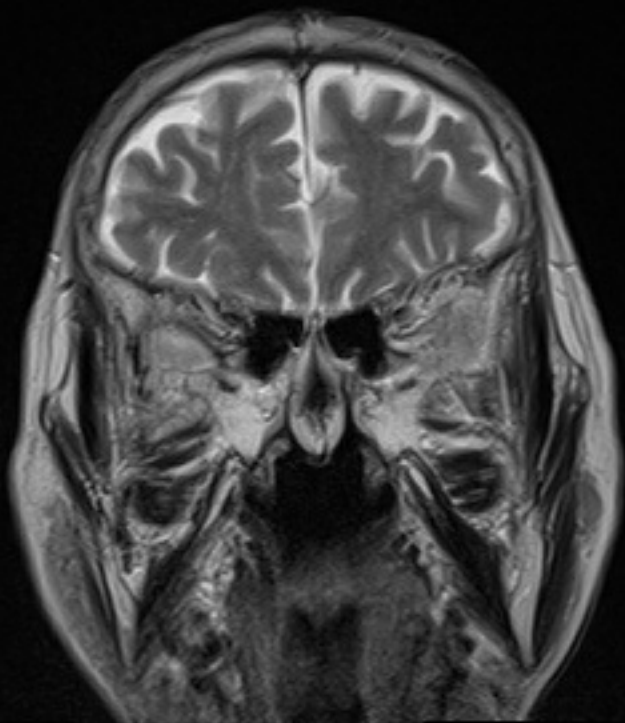



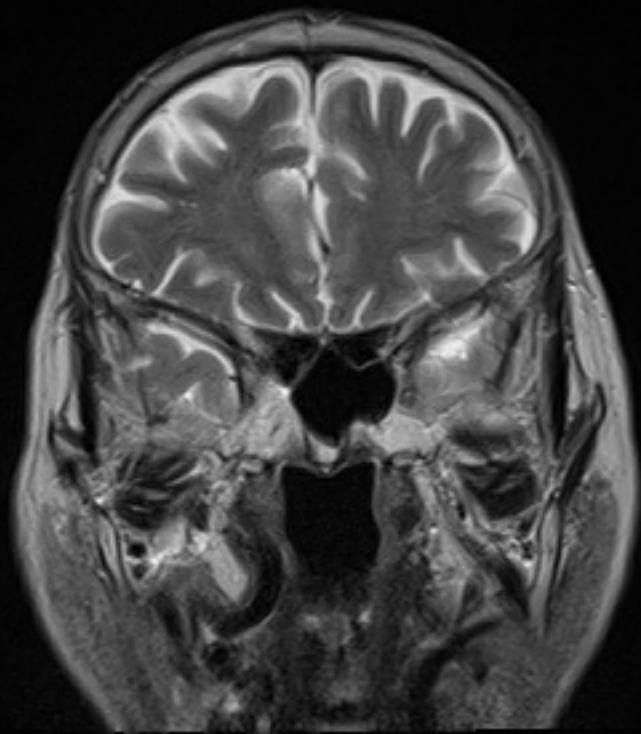

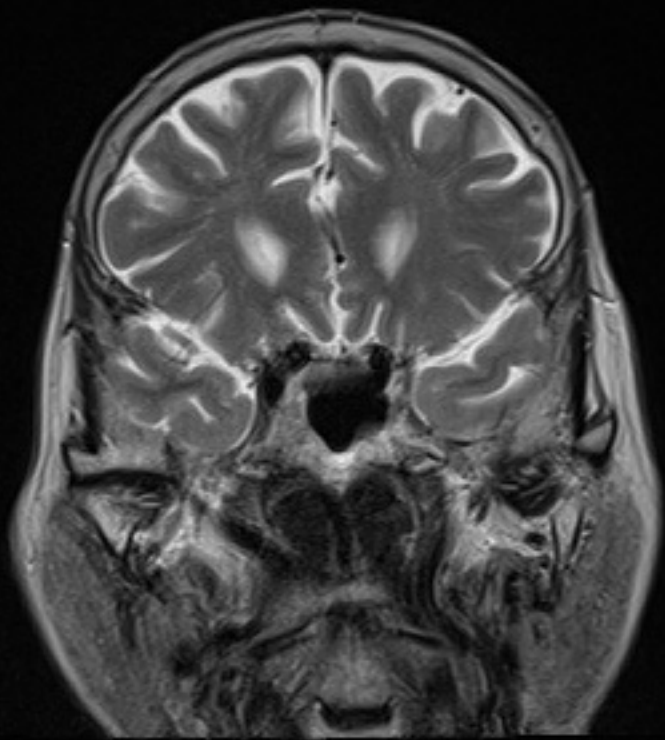

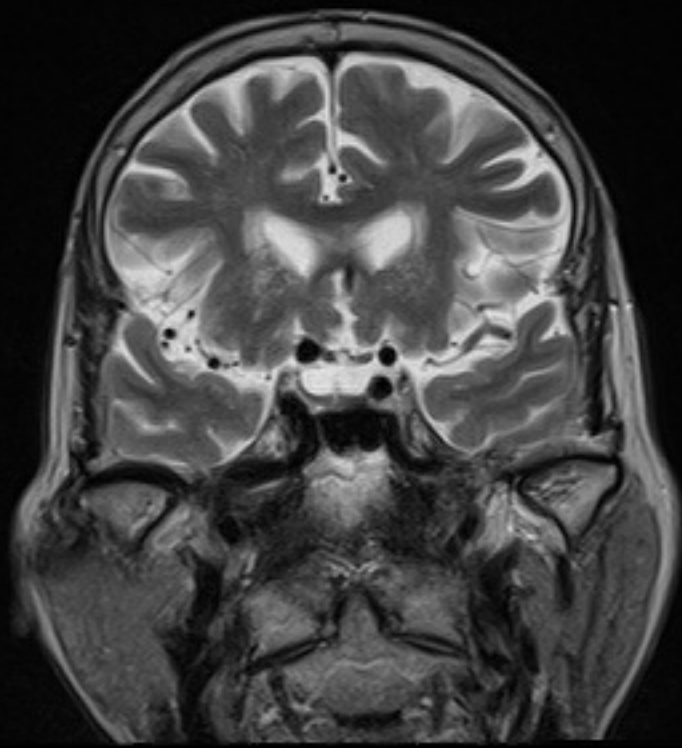

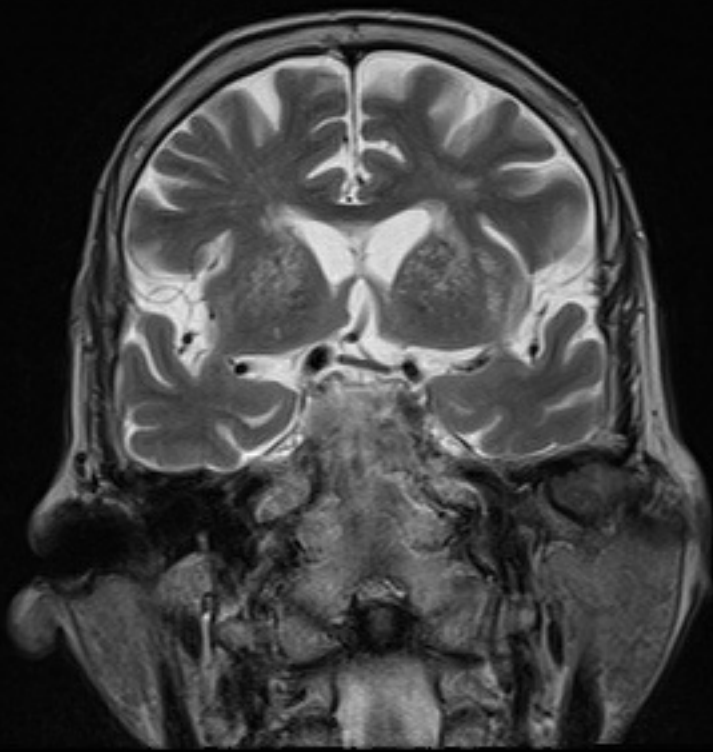

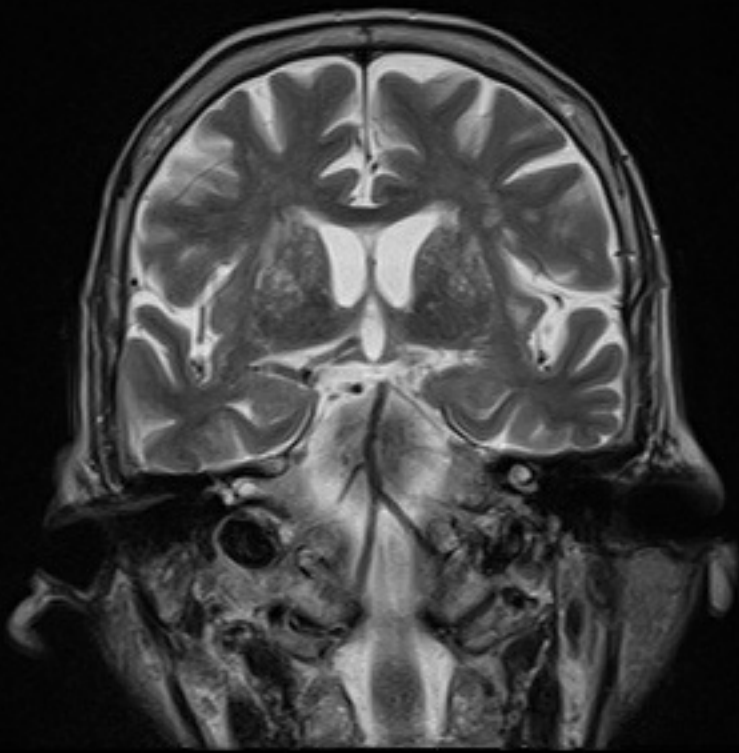

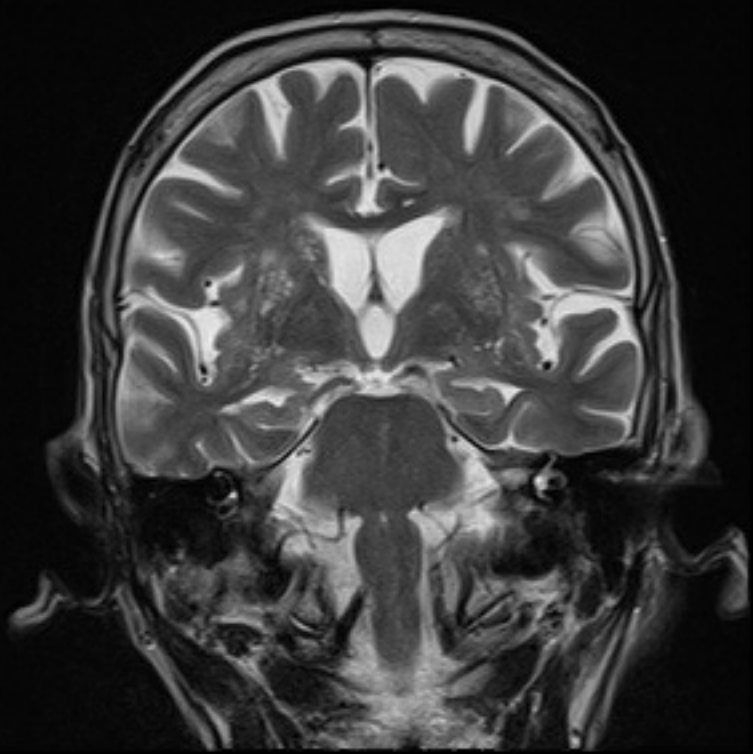

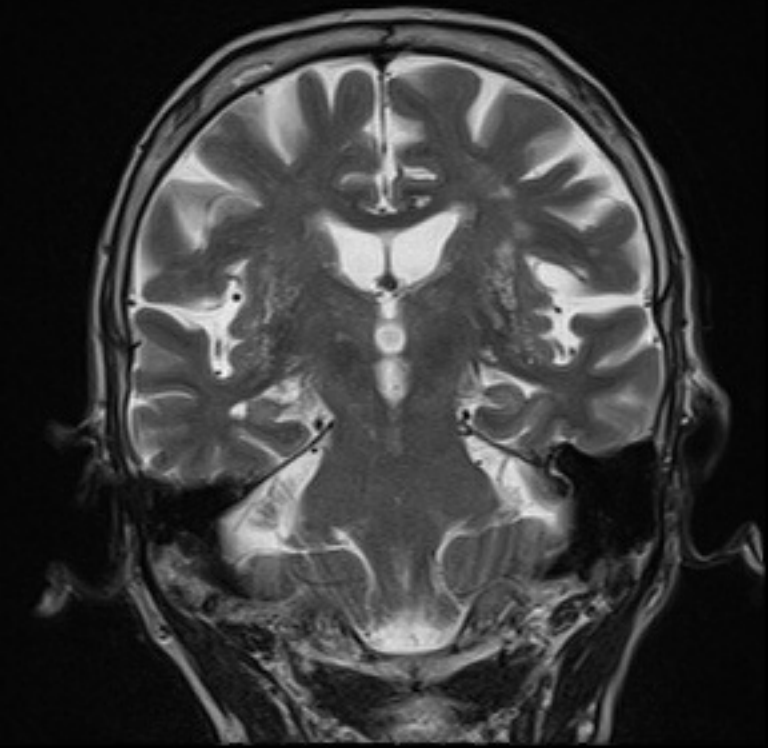

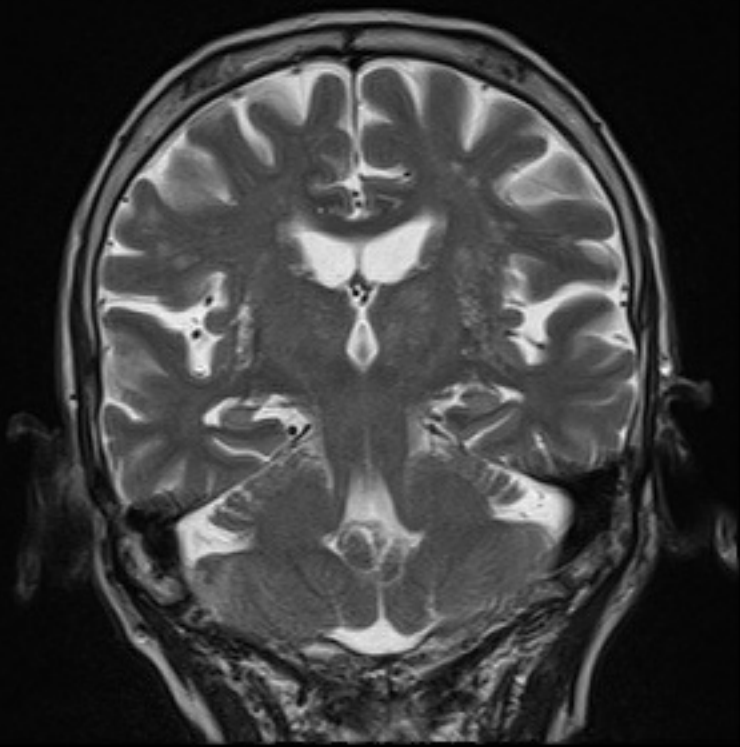



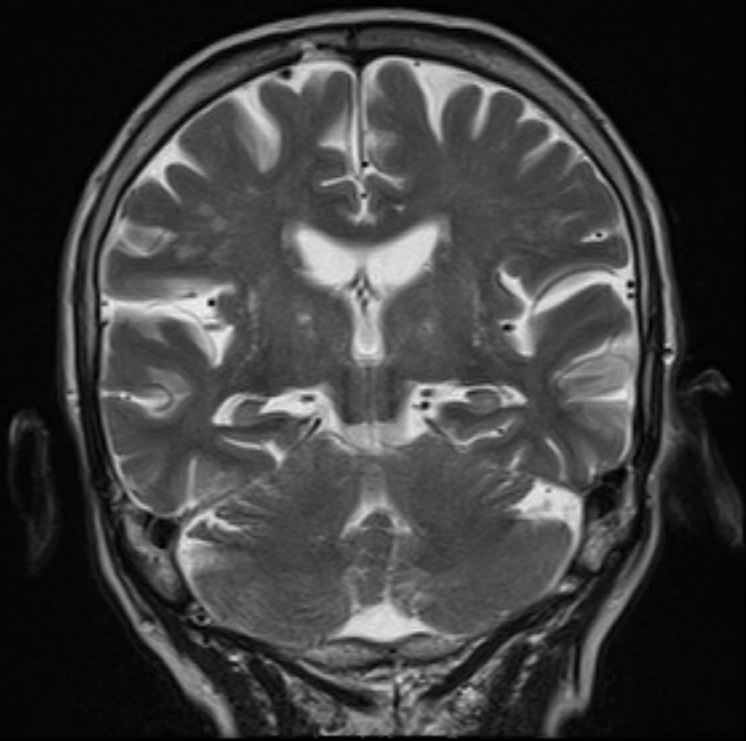

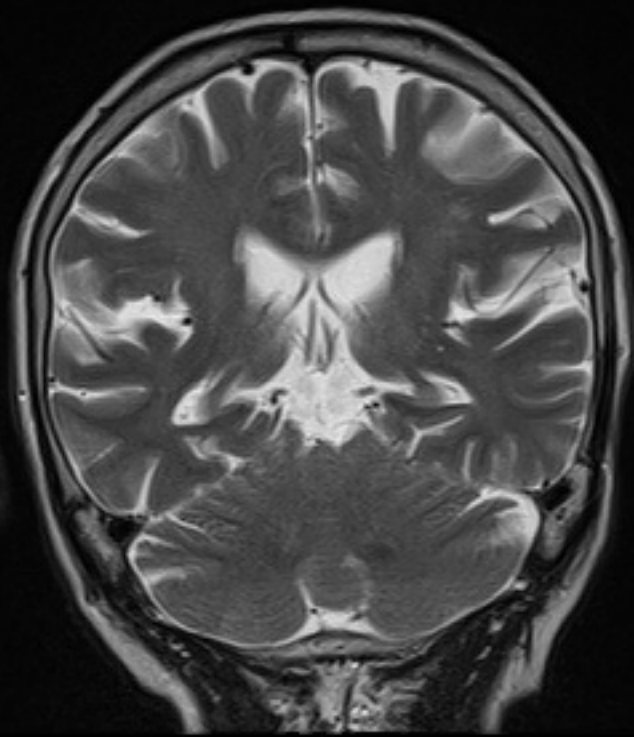

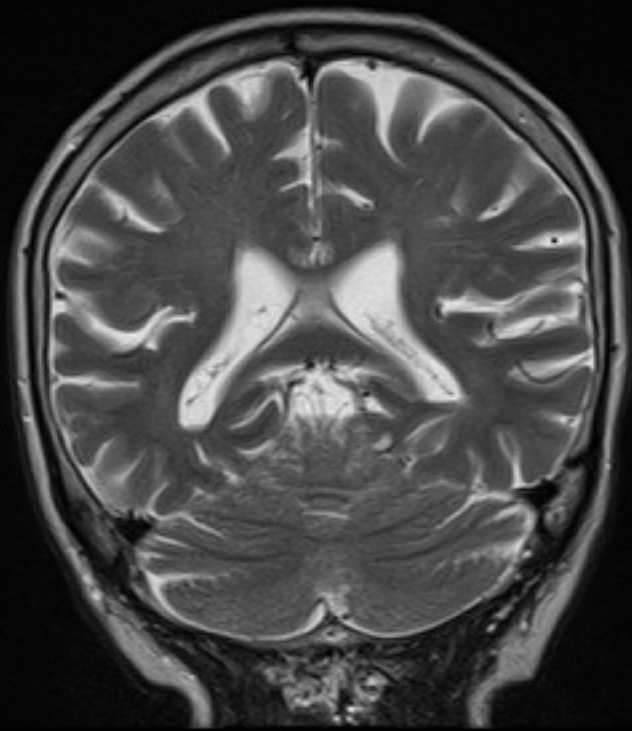

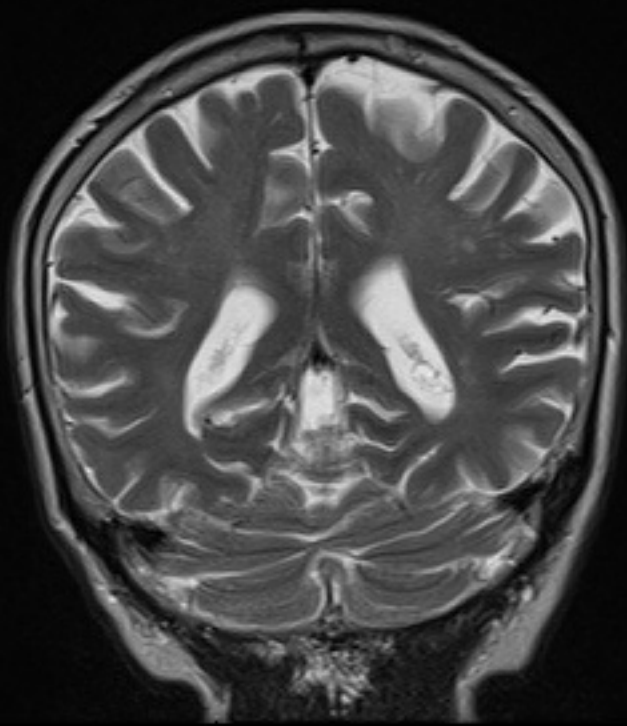

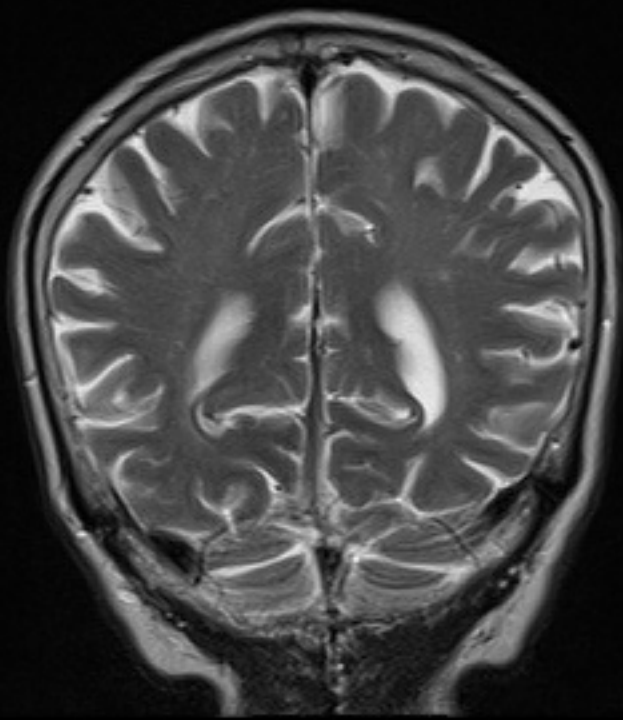

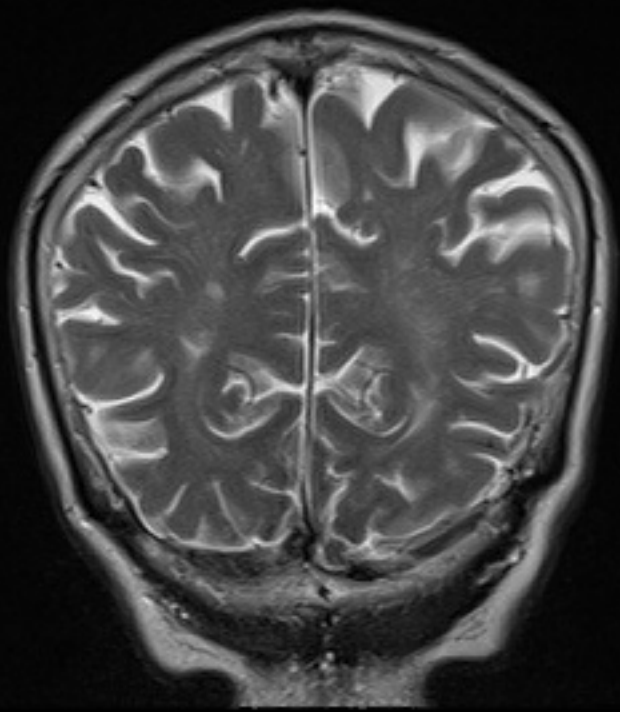

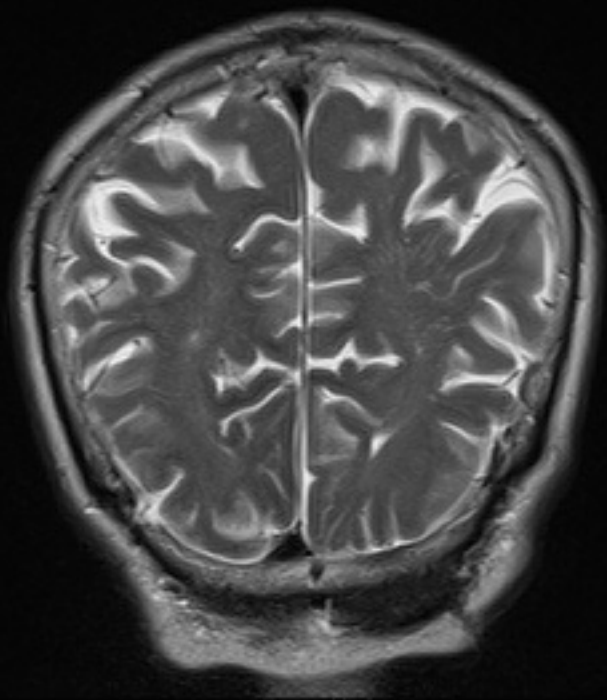

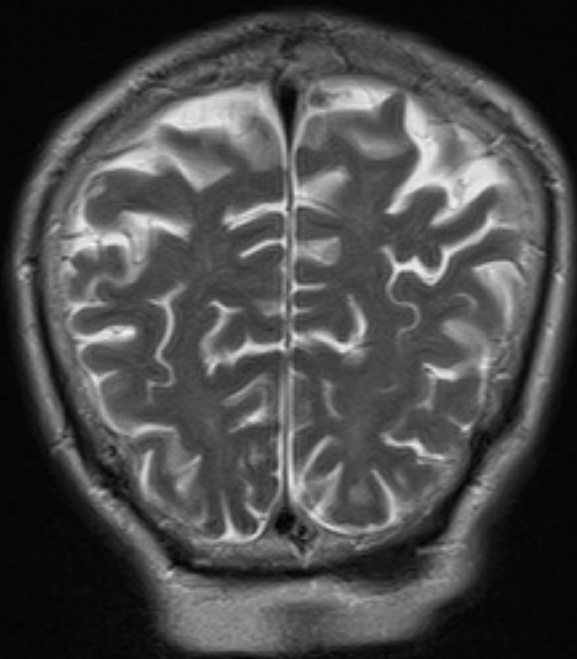



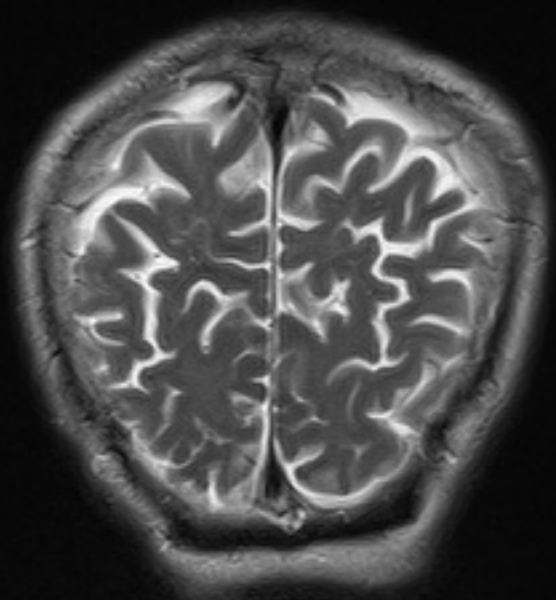

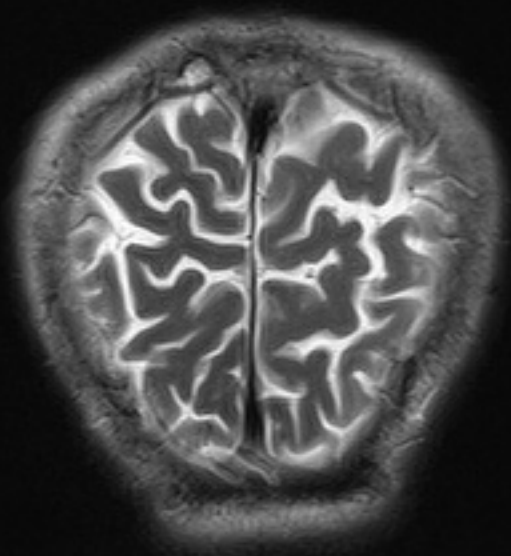

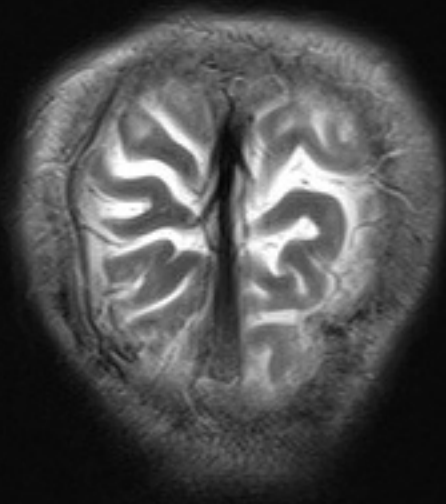

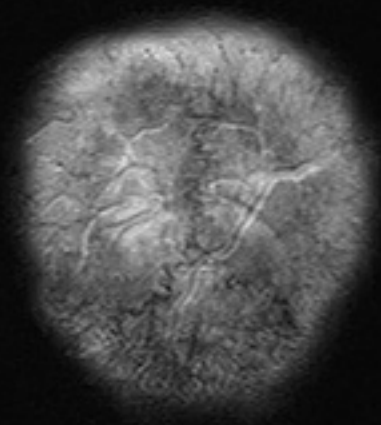

Supplement: Supplementary file 6 [file 1]
