# Supplementary material
Source: publisher figshare collection journal article supplement (https://karger.figshare.com/articles/dataset/_/11671407)
Supplement: Supplementary file 1 [file 1]

Idx 0  
ADC\_5146  
CR  
Se 1  
Im 0

# Supplement 4 - 1 20080129 - Chest - Rx image

BORAMAE HOSPITAL  
2008-01-29

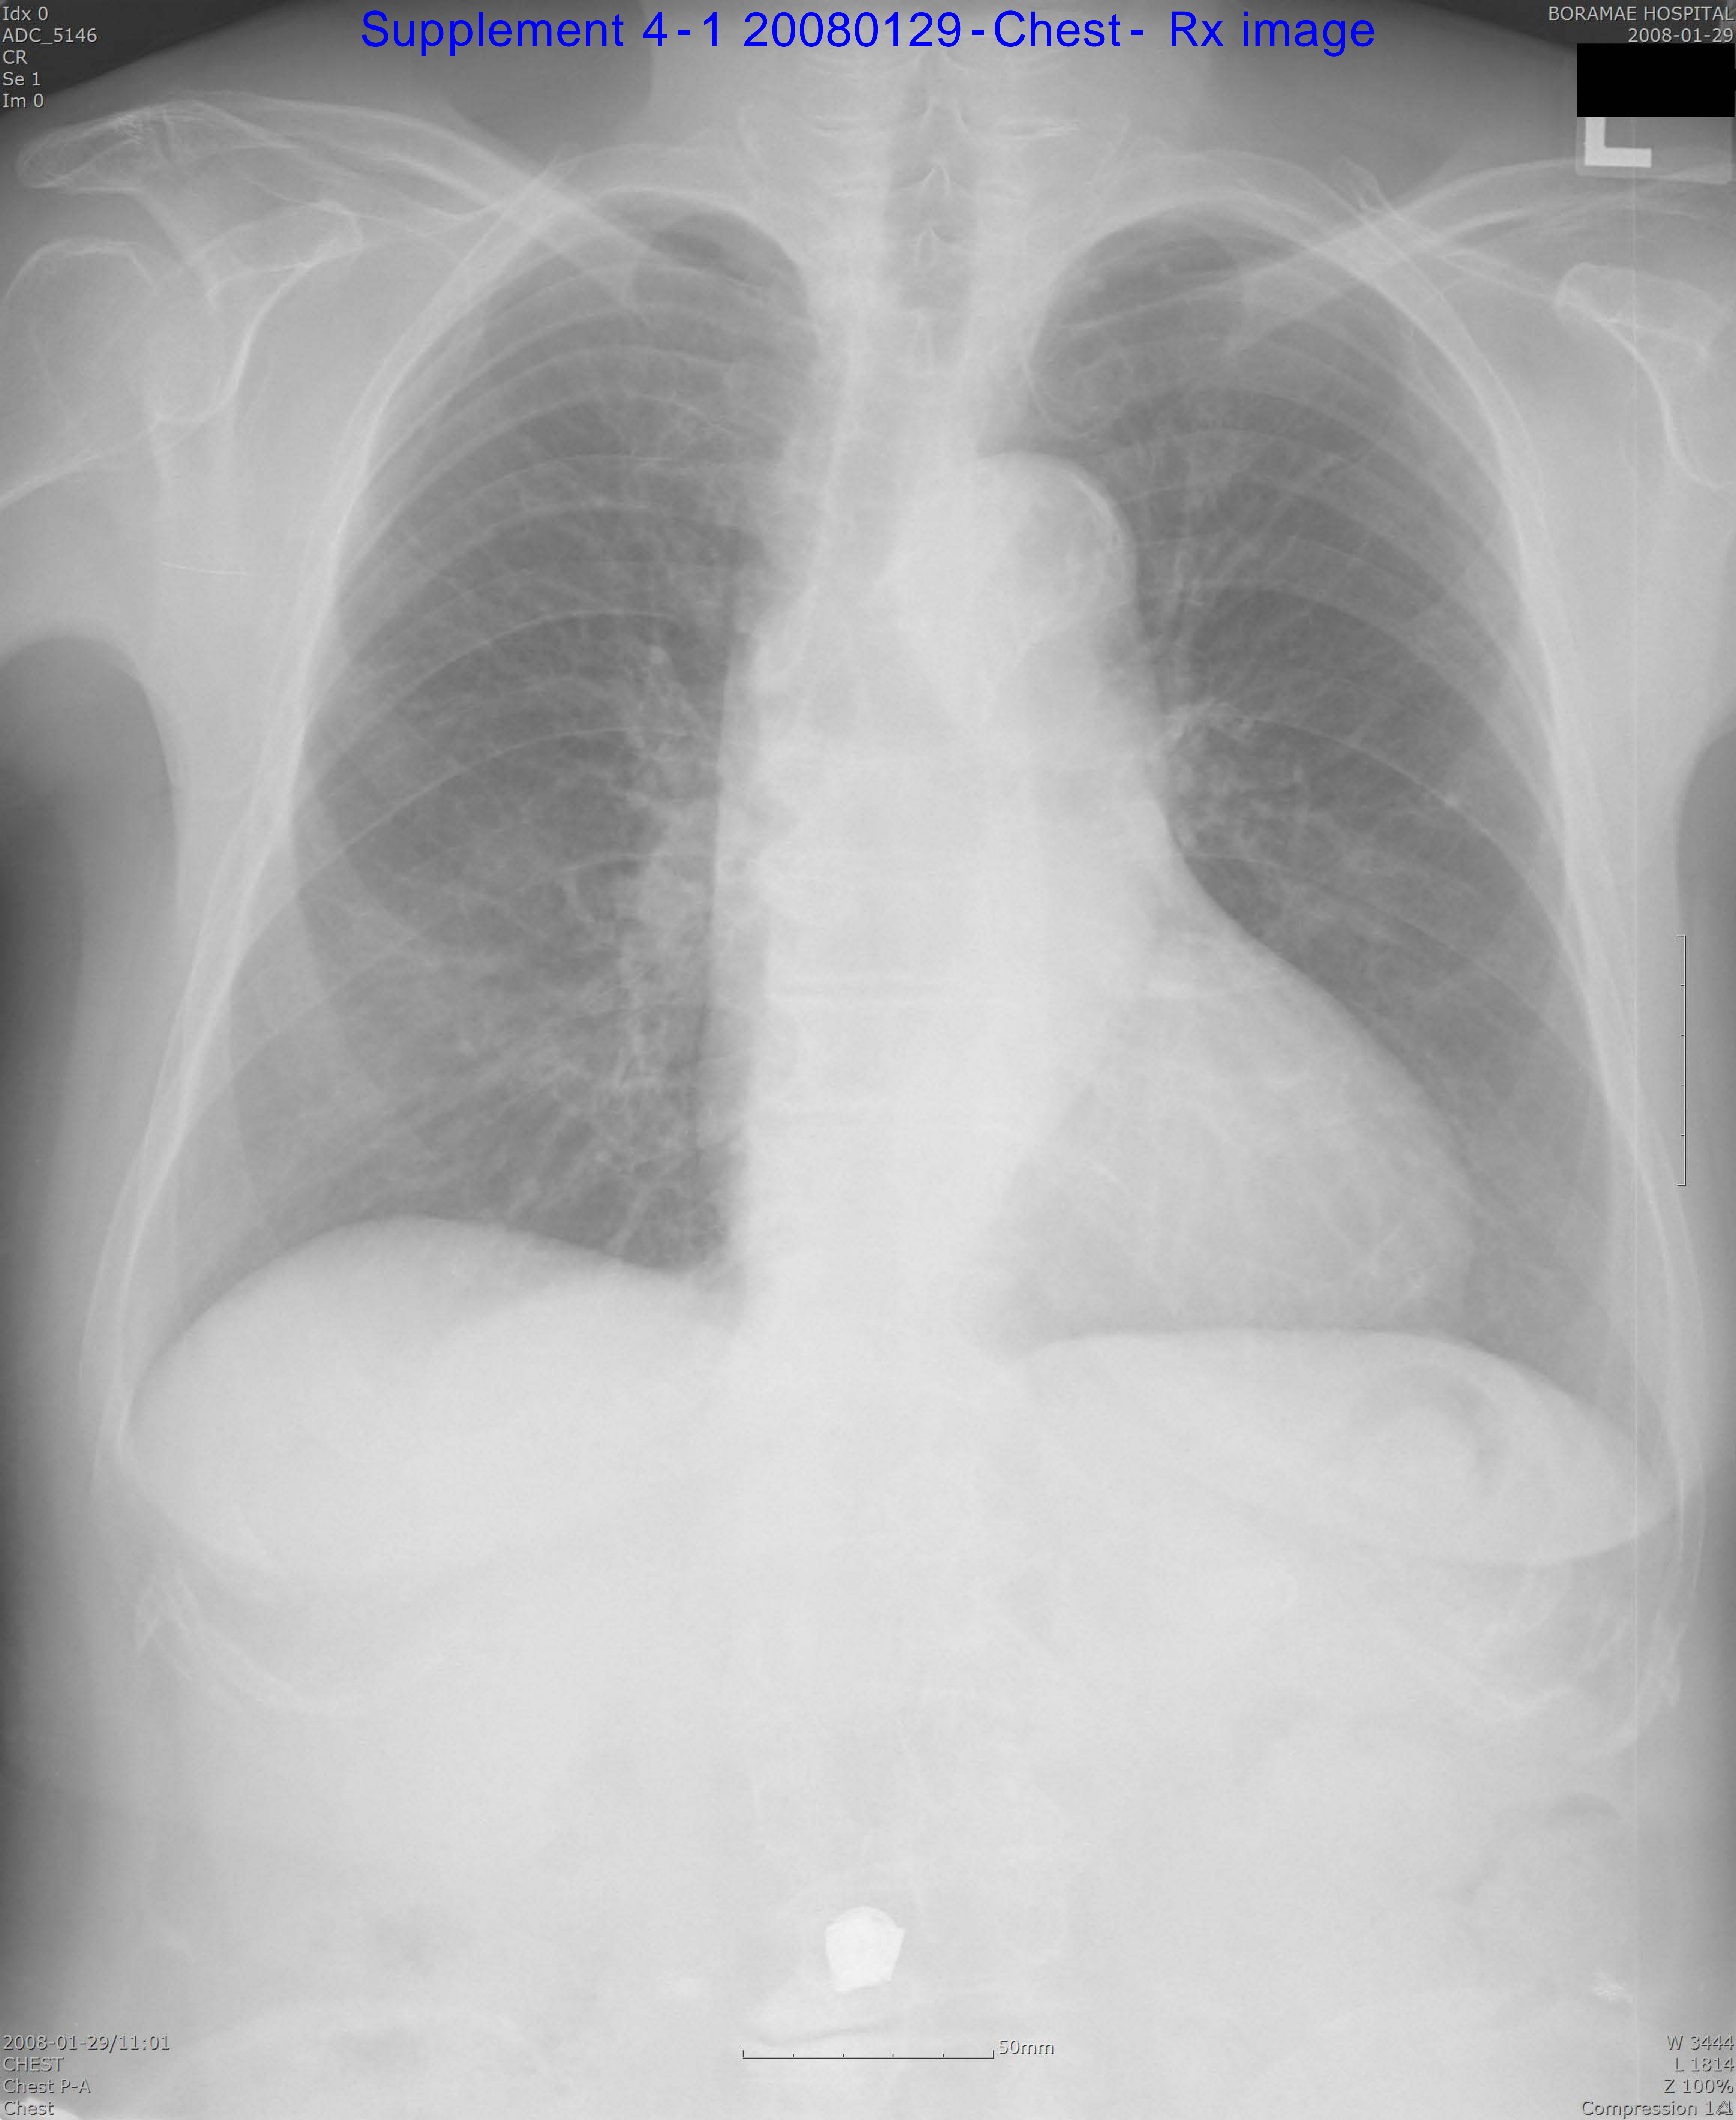

2008-01-29/11:01  
CHEST  
Chest P-A  
Chest

50mm

W 3444  
L 1814  
Z 100%  
Compression 1/4
