# Supplementary material
Source: publisher figshare collection journal article supplement (https://karger.figshare.com/articles/dataset/_/11671407)
Supplement: Supplementary file 2 [file 1]

# Supplement 3 - The Korea Orphan & Essential Drug Center supplied DAPSON Fatol

## RECEIPT

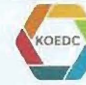

한국희귀·필수의약품센터  
Korea Orphan & Essential Drug Center

Name of Hospital 포근한요양병원 Pogeunhan Nursing Hospital

| Prescription date | Description  | Unit                   | Quantity |  |  |  |
|-------------------|--------------|------------------------|----------|--|--|--|
| 2018-11-28        | Dapson Fatol | 50mg/ta <sup>pac</sup> | 1        |  |  |  |
|                   |              |                        |          |  |  |  |
|                   |              |                        |          |  |  |  |
|                   |              |                        |          |  |  |  |
|                   |              |                        |          |  |  |  |
|                   |              |                        |          |  |  |  |
|                   |              |                        |          |  |  |  |
|                   |              |                        |          |  |  |  |
|                   |              |                        |          |  |  |  |
|                   |              |                        |          |  |  |  |
|                   |              |                        |          |  |  |  |
|                   |              |                        |          |  |  |  |
|                   |              |                        |          |  |  |  |
|                   |              |                        |          |  |  |  |
|                   |              |                        |          |  |  |  |

|  |  |                |                                       |
|--|--|----------------|---------------------------------------|
|  |  | Pharmacy Name  | Korean Orphan & Essential Drug Center |
|  |  | Representative | Kim Chang Jon                         |

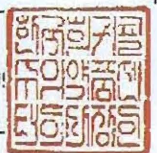

2019-05-24

# RECEIPT

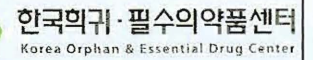

# RECEIPT

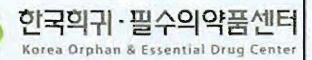[illegible]
