# Supplementary material
Source: publisher figshare collection journal article supplement (https://karger.figshare.com/articles/dataset/_/11671407)
Supplement: Supplementary file 3 [file 1]

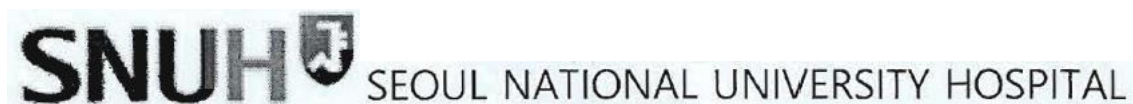

Patient ID : ( ) Patient Name : ( ) Gender/Age : ( )

### Function Examination Result

Department of Neurology : Hospital (Outpatient)

Date Created : 2018-11-06 13:03

### Report of test group results for cognitive impairment / Final

|                                                   | Test Results                                                                  | Reference                                                                                                                  | Note                                                                                                                                                                       |
|---------------------------------------------------|-------------------------------------------------------------------------------|----------------------------------------------------------------------------------------------------------------------------|----------------------------------------------------------------------------------------------------------------------------------------------------------------------------|
| Mini-Mental State Examination (MMSE)              | (18)<br>/ 30                                                                  | 27-30 : Normal<br>25-26: Suspected<br>24 or less: cognitive impairment                                                     | - Because of the high correlation between the education level and the score, clinical consideration of cognitive impairment is needed.                                     |
| Clinical Dementia Rating (CDR)                    | 1.0                                                                           | 0: Normal<br>0.5: Questionable<br>1: Mild<br>2: Moderate<br>3: Severe                                                      | - For CDR 0.5, please retest after 6 months                                                                                                                                |
| Frontal Assessment Battery (FAB)                  | (16)<br>/ 18                                                                  | 17-18: Normal<br>16 or less: frontal dysfunction<br>12 or less: FTD estimation (sensitivity 79%)                           | Overall evaluation items (Item 6) conceptualization, cognitive flexibility, continuity of behavior, Conflicting instruction, inhibition control                            |
| Neuro-psychiatric Inventory Questionnaire (NPI-Q) | Total score: 30 points<br><br>Reported abnormal behavior: delusions, abnormal | Score possible .0 ~ 180<br><br>The larger the score, handicapped<br><br>Enumerate the top 5 items with severe disabilities | All survey items (Section 12) delusions. hallucination, stubbornness, depression, anxiety, mania, apathy, disinhibition, nervousness, ataxia. nighttime behavior, appetite |

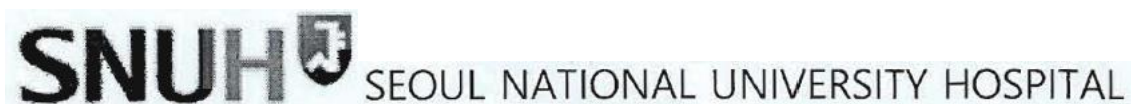

Patient ID : ( ) Patient Name : ( ) Gender/Age : ( )

### Function Examination Result

Department of Neurology : Hospital (Outpatient)

Date Created : 2018-11-06 13:03

### Report of test group results for cognitive impairment / Final

|                                                  |           |                                                                                                                                                                           |                                                                                                                                                                                                  |
|--------------------------------------------------|-----------|---------------------------------------------------------------------------------------------------------------------------------------------------------------------------|--------------------------------------------------------------------------------------------------------------------------------------------------------------------------------------------------|
|                                                  | movements |                                                                                                                                                                           |                                                                                                                                                                                                  |
| Instrumental Activities of Daily Living (K-IADL) | 0.6       | Normal: Less than 0.43<br><br>Score range: 0-3 The higher the score, handicapped                                                                                          | Full survey items (section 11) Buy in the market, transportation, money management, housework. food preparation. Phone call, taking medicine. recent memories, hobbies watching TV, House repair |
| Geriatric Depression Scale (GDS)                 | 3         | Score Scope: 0-30<br><br>Normal: 0- 17 points<br><br>Depression : 18 points or more<br><br>18 ~ 20 points (reliability 66.67%)<br><br>21 points or more (reliability 85%) | If you have a score of -21 or more, consider antidepressants.                                                                                                                                    |
| Geriatric Stress Scale (GSS)                     | 0         | Score range: 0-48 points                                                                                                                                                  |                                                                                                                                                                                                  |
| Lewy body composite risk score                   | 0         |                                                                                                                                                                           |                                                                                                                                                                                                  |

Conclusion Acute/subacute cognitive impairment

Recommendations Memory and attention deficits were observed.

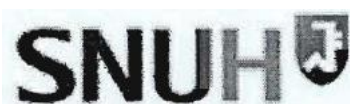

SEOUL NATIONAL UNIVERSITY HOSPITAL

Patient ID : ( )

Patient Name : ( )

Gender/Age : ( )

## Function Examination Result

Department of Neurology : Hospital (Outpatient)

Date Created : 2019-01-14 16:53

## Report of test group results for cognitive impairment / Final

|                                                   | Test Results                                                  | Reference                                                                                                                  | Note                                                                                                                                                                          |
|---------------------------------------------------|---------------------------------------------------------------|----------------------------------------------------------------------------------------------------------------------------|-------------------------------------------------------------------------------------------------------------------------------------------------------------------------------|
| Mini-Mental State Examination (MMSE)              | (17)<br>/ 30                                                  | 27-30 : Normal<br><br>25-26: failure suspected<br><br>24 or less: cognitive impairment                                     | - Because of the high correlation between the education level and the score, clinical consideration of cognitive impairment is needed.                                        |
| Clinical Dementia Rating (CDR)                    | 1.0                                                           | 0: Normal<br><br>0.5: Questionable<br><br>1: Mild<br><br>2: Moderate<br><br>3: Severe                                      | - For CDR 0.5, please retest after 6 months                                                                                                                                   |
| Frontal Assessment Battery (FAB)                  | (14)<br>/ 18                                                  | 17-18: Normal<br><br>16 or less: frontal dysfunction<br><br>12 or less: FTD estimation (sensitivity 79%)                   | Overall evaluation items (Item 6)<br>Conceptualization, cognitive flexibility, continuity of behavior, conflicting instruction, inhibition control                            |
| Neuro-psychiatric Inventory Questionnaire (NPI-Q) | Total score: 0 points<br><br>Abnormal behavior reported: None | Score possible .0 • 180<br><br>The larger the score, handicapped<br><br>Enumerate the top 5 items with severe disabilities | All survey items (Section 12)<br>delusions, hallucination, stubbornness, depression, anxiety, mania, apathy, disinhibition, nervousness, ataxia, nighttime behavior, appetite |



Patient ID : ( ) Patient Name : ( ) Gender/Age : ( )

### Function Examination Result

Department of Neurology : Hospital (Outpatient)

Date Created : 2019-01-14 16:53

### Report of test group results for cognitive impairment / Final

|                                                  |     |                                                                                                                                                           |                                                                                                                                                                                                   |
|--------------------------------------------------|-----|-----------------------------------------------------------------------------------------------------------------------------------------------------------|---------------------------------------------------------------------------------------------------------------------------------------------------------------------------------------------------|
| Instrumental Activities of Daily Living (K-IADL) | 0.3 | Normal: Less than 0.43<br><br>Score range: 0-3 The higher the score, handicapped                                                                          | Full survey items (section 11) Buy in the market, transportation, money management, housework, Food preparation. Phone call, taking medicine. recent memories, hobbies. Watching TV, House repair |
| Geriatric Depression Scale (GDS)                 | 2   | Score Scope. 0-30<br>Normal: 0- 17 points<br>Depression : 18 points or more<br>18 ~ 20 points (reliability 66.67%)<br>21 points or more (reliability 85%) | If you have a score of -21 or more, consider antidepressants.                                                                                                                                     |
| Geriatric Stress Scale (GSS)                     | 2   | Score range: 0-48 points                                                                                                                                  |                                                                                                                                                                                                   |
| Lewy body composite risk score                   | 0   |                                                                                                                                                           |                                                                                                                                                                                                   |

Conclusion Attention disorder

Recommendations Attention disorder and memory impairment are observed.

This is an improvement over the previous test (2018.11).

The attached copy proves to be the same as the original medical record 4 / 26 Printed by: Doo Ho Choi ( 2019-05-27 15:52:06 ) ( 2019-05-27 15:52:06 )

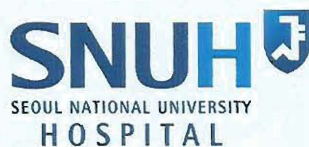

SEOUL NATIONAL UNIVERSITY HOSPITAL  
MEDICAL CERTIFICATE

|            |  |
|------------|--|
| [REDACTED] |  |
| [REDACTED] |  |
| [REDACTED] |  |

|                   |              |
|-------------------|--------------|
| PERMANENT ADDRESS | PHONE (INT.) |
|-------------------|--------------|

THIS CERTIFIES THAT THE ABOVE NAMED PATIENT WAS EXAMINED WITH THE FOLLOWING RESULTS:

1. DIAGNOSIS : PRELIMINARY ☒ CONCLUSIVE ☐

#r/o metabolic encephalopathy

#r/o subjective memory impairment

#r/o anxiety disorder

2. TREATMENT ☐ 3. OPINION ☐

The patient needs long-term medication and supportive care.

|                    |            |                              |                |
|--------------------|------------|------------------------------|----------------|
| PHYSICIAN'S NAME : | AH WON KIM | M.D.                         | [REDACTED]     |
| LICENSE NUMBER :   | 120744     |                              |                |
| DEPT. OF:          | Neurology  | DATE ISSUED:<br>(MM/DD/YYYY) | 05 / 31 / 2019 |

SEOUL NATIONAL UNIVERSITY HOSPITAL

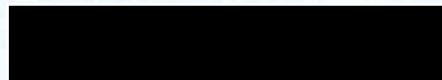

직인  
STAMP

This document is invalid without SNUH stamp. [REDACTED]

INTERNATIONAL HEALTHCARE CENTER / SEOUL NATIONAL UNIVERSITY HOSPITAL

[REDACTED] JONGNO-GU SEOUL, 03080 KOREA / TEL: +82-2-2072-0505 / FAX: +82-2-2072-0785 /

EMAIL: international@snuh.org / WEB: www.snuh.org/english

Patient ID : ( )

Patient Name : ( CHO )

Gender/Age : ( )

기능검사결과

진료과 : 신경과 (외래)

작성일 : 2019-01-14 16:53

인지장애 유무 판정을 위한 검사군 결과 보고 ( 최종 )

인지장애 유무

환자

정보제공자 / 보호자

교육 ☐ 문맹 ☐ 무학

환자와의 관계

아들

동거

( ☒ 초 ☐ 중 ☐ 고 ☐ 대 ) 졸 총 6년

성별

나이

만

세

검사자 관찰사항

|                                                   | 검사결과                                                         | 참고치†                                                                  | 참고 사항                                                                      |
|---------------------------------------------------|--------------------------------------------------------------|-----------------------------------------------------------------------|----------------------------------------------------------------------------|
| Mini-Mental State Examination (MMSE)              | 17 / 30                                                      | 27-30 : 정상<br>25-26 : 장애 의심<br>24이하: 인지장애                             | - 교육 수준과 점수의 상관관계가 높으므로, 인지장애 여부에 대한 임상적 고려를 요함                            |
| Clinical Dementia Rating (CDR)                    | 1.0                                                          | 0: Normal<br>0.5: Questionable<br>1: Mild<br>2: Moderate<br>3: Severe | - CDR 0.5인 경우 6개월 후 재검사요망<br>please retest after 6 month                   |
| Frontal Assessment Battery (FAB)                  | 14 / 18                                                      | 17-18: 정상<br>16 이하: 전두엽 기능 장애<br>12 이하: FTD 추정 (민감도 79%)              | 전체평가항목(6항)<br>개념화, 인지적 유연성, 행동 연속성, 상충되는 지시, 억제 조절                         |
| Neuro-psychiatric Inventory Questionnaire (NPI-Q) | 총점 : 0 점<br>보고된 이상행동: 없음<br>Abnormal behavior reported: None | 점수가범위:0-180<br>점수가 클수록 장애<br>장애 정도가 심한 상위 5개 항목까지 열거함                 | 전체조사항목(12항)<br>망상, 환각, 완고함, 우울, 불안, 조증, 무감동, 탈억제, 신경질, 운동장애, 야간 행동, 식욕     |
| Instrumental Activities of Daily Living (K-IADL)  | 0.3                                                          | 정상: 0.43점 미만<br>점수가범위: 0-3<br>점수가 클수록 장애                              | 전체조사항목(11항)<br>시장보기, 교통수단, 돈관리, 집안일, 음식준비, 전화, 약복용, 최근기억, 취미생활, TV시청, 집안수리 |

25 - 26 : Suspected  
24 or less: Cognitive impairment  
Because of the high correlation between the education level and the score, clinical consideration of cognitive impairment is needed.

16 or less: frontal dysfunction  
12 or less: FTD estimation (sensitivity 79%)  
Overall evaluation items (Item 6) conceptualization, cognitive flexibility, continuity of behavior, conflicting instruction, inhibition control

Score possible : 0 ~ 180  
The larger the score, handicapped  
Enumerate the top 5 items with severe disabilities  
All survey items (Section 12) delusions, hallucination, stubbornness, depression, anxiety, mania, apathy, disinhibition, nervousness, ataxia, nighttime behavior, appetite

Score range: 0 - 3  
The higher the score, handicapped

Buy in the market, transportation, money management, housework, food preparation, phone call, taking medicine, recent memories, hobbies, watching TV, house repair

Patient ID : ( )

Patient Name : ( CHO )

Gender/Age : ( )

|                                  |   |                                                                                      |                           |
|----------------------------------|---|--------------------------------------------------------------------------------------|---------------------------|
| Geriatric Depression Scale (GDS) | 2 | 점수가능범위: 0-30<br>정상: 0- 17점<br>우울증: 18점 이상<br>18~20점 (신뢰도 66.67%)<br>21점 이상 (신뢰도 85%) | -21점 이상인 경우<br>항우울제를 고려요망 |
| Geriatric Stress Scale (GSS)     | 2 | 점수가능범위: 0-48점                                                                        |                           |
| Lewy body composite risk score   | 0 |                                                                                      |                           |

Normal: 0 - 17 points  
 Depression : 18 points or more  
 18 ~ 20 points (reliability 66.67%)  
 21 points or more (reliability 85%)  
 If you have a score of -21 or more, consider antidepressants.

† 문헌상 보고된 잠정치임, 이에 대한 자료 문의는 신경심리검사실(3932)

결론

주의력 장애

추천사항

1. 주의력 장애 및 기억력 장애가 관찰됩니다.
2. 이전검사(2018.11)에 비교하여 호전된 양상입니다. This is an improvement over the previous test (2018.11).

검사 및 판독 강세희 / 이하은 / / 이경민 MD, PhD

판독의 이경민

이경민

Pf. Kyung-min Lee,  
Neurologist

기능검사결과

진료과 : 신경과 (외래)

작성일 : 2018-11-06 13:03

인지장애 유무 판정을 위한 검사군 결과 보고 ( 최종 )

인지장애 유무

환자

교육 ☐ 문맹 ☐ 무학( ☒ 초 ☐ 중 ☐ 고 ☐ 대 ) 졸 총 6년

검사자 관찰사항

정보제공자 / 보호자

환자와의 관계 아들 동거

성별 나이 만 세

Son / Cohabitation

Patient ID : ( )

Patient Name : ( ) CHO

Gender/Age : ( )

|                                                   | 검사결과<br>Results                                                                                                          | 참고치†                                                                           | 참고 사항                                                                      |
|---------------------------------------------------|--------------------------------------------------------------------------------------------------------------------------|--------------------------------------------------------------------------------|----------------------------------------------------------------------------|
| Mini-Mental State Examination (MMSE)              | 18 / 30                                                                                                                  | 27-30 : 정상<br>25-26 : 장애 의심<br>24이하: 인지장애                                      | - 교육 수준과 점수의 상관관계가 높으므로, 인지장애 여부에 대한 임상적 고려를 요함                            |
| Clinical Dementia Rating (CDR)                    | 1.0                                                                                                                      | 0: Normal<br>0.5: Questionable<br>1: Mild<br>2: Moderate<br>3: Severe          | - CDR 0.5인 경우 6개월 후 재검사요망                                                  |
| Frontal Assessment Battery (FAB)                  | 16 / 18                                                                                                                  | 17-18: 정상<br>16 이하: 전두엽 기능 장애<br>12 이하: FTD 추정 (민감도 79%)                       | 전체평가항목(6항)<br>개념화, 인지적 유연성, 행동 연속성, 상충되는 지시, 억제 조절                         |
| Neuro-psychiatric Inventory Questionnaire (NPI-Q) | 총점 : 30 점<br>보고된 이상행동:<br>망상, 이상운동                                                                                       | 점수가가능범위:0-180<br>점수가 클수록 장애<br><br>장애 정도가 심한 상위 5개 항목까지 열거함                    | 전체조사항목(12항)<br>망상, 환각, 완고함, 우울, 불안, 조증, 무감동, 탈억제, 신경질, 운동장애, 야간 행동, 식욕     |
| Instrumental Activities of Daily Living (K-IADL)  | 0.6                                                                                                                      | 정상: 0.43점 미만<br><br>점수가가능범위: 0-3<br>점수가 클수록 장애                                 | 전체조사항목(11항)<br>시장보기, 교통수단, 돈관리, 집안일, 음식준비, 전화, 약복용, 최근기억, 취미생활, TV시청, 집안수리 |
| Geriatric Depression Scale (GDS)                  | 3<br>Normal: 0 - 17 points<br>Depression : 18 points or more<br>18 ~ 20 points (reliability 66.67%)<br>21 points or more | 점수가가능범위: 0-30<br>정상:0- 17점<br>우울증:18점이상<br>18~20점 (신뢰도66.67%)<br>21점이상(신뢰도85%) | -21점이상인 경우 항우울제를 고려요망<br><br>of - 21 or more, consider antidepressants.    |
| Geriatric Stress Scale (GSS)                      | 0(reliability 85%)                                                                                                       | 점수가가능범위: 0-48점                                                                 |                                                                            |
| Lewy body composite risk score                    | 0                                                                                                                        |                                                                                |                                                                            |

† 문헌상 보고된 잠정치임, 이에 대한 자료 문의는 신경심리검사실(3932)

결론

급성/아급성 인지장애

급성 인지장애

추천사항

1. 기억력 장애 및 주의력 장애가 관찰되었습니다.

첨부한 사본은 의무기록 원본과 같음을 증명합니다.

Patient ID : ( ) Patient Name : ( CHO ) Gender/Age : ( )

2. 3개월 후 추적검사 의뢰를 고려하기 바랍니다.

검사 및 판독 강세희 / 이하은 / / 이경민 MD, PhD

판독의 이경민 이경민

Pf. Kyung-min Lee,  
Neurologist

기능검사결과

진료과 : 이비인후과 (외래)

작성일 : 2012-05-14 11:40

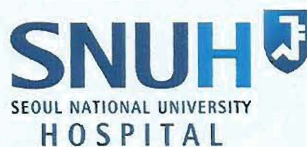

SEOUL NATIONAL UNIVERSITY HOSPITAL  
MEDICAL CERTIFICATE

|                      |                   |                |      |                              |      |
|----------------------|-------------------|----------------|------|------------------------------|------|
| NAME                 | ■■■■ CHO          | GENDER         | ■■■■ | BIRTH DATE<br>(MM/DD/YYYY)   | ■■■■ |
| NATIONALITY          | Republic of Korea | SNUH<br>ID NO. | ■■■■ | PASSPORT or<br>R.O.K. ID NO. |      |
| KOREAN<br>ADDRESS    | Seoul             |                |      | PHONE<br>(KOREA)             | ■■■■ |
| PERMANENT<br>ADDRESS |                   |                |      | PHONE (INT.)                 |      |

THIS CERTIFIES THAT THE ABOVE NAMED PATIENT WAS EXAMINED WITH THE FOLLOWING RESULTS:

1. DIAGNOSIS : PRELIMINARY ☒ CONCLUSIVE ☐

#r/o metabolic encephalopathy

#r/o subjective memory impairment

#r/o anxiety disorder

2. TREATMENT ☐ 3. OPINION ☐

The patient needs long-term medication and supportive care.

|                       |            |                                 |                |
|-----------------------|------------|---------------------------------|----------------|
| PHYSICIAN'S<br>NAME : | AH WON KIM | M.D.                            | 김아원            |
| LICENSE<br>NUMBER :   | 120744     |                                 |                |
| DEPT.<br>OF:          | Neurology  | DATE<br>ISSUED:<br>(MM/DD/YYYY) | 05 / 31 / 2019 |

SEOUL NATIONAL UNIVERSITY HOSPITAL

서울대학교병원

This document is invalid without SNUH stamp. (병원 직인이 없는 경우 무효함).

INTERNATIONAL HEALTHCARE CENTER / SEOUL NATIONAL UNIVERSITY HOSPITAL

■■■■ JONGNO-GU SEOUL, 03080 KOREA / TEL: +82-2-2072-0505 / FAX: +82-2-2072-0785 /

EMAIL: international@snuh.org / WEB: www.snuh.org/english
