# Supplementary material
Source: publisher figshare collection journal article supplement (https://karger.figshare.com/articles/dataset/_/11671407)
Supplement: Supplementary file 4 [file 1]

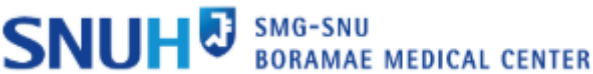

00838749 1 12 49504851 20080205 0 106

|                              |  |                        |                 |                    |                              |
|------------------------------|--|------------------------|-----------------|--------------------|------------------------------|
| Registration Number          |  | Medical department     | Psychiatry      | Medical doctor     | June-young Lee               |
| Name                         |  | Sex / Age              |                 | Date               | 2008.02.05 11:15             |
| Resident registration number |  | Patient classification | Local insurance | Reception category | A reservation after visiting |

MMSE = 23.  
CEDAS = 45  
CDR = 0.5 / 0.5 / 1.5  
MR 6d hippocampal atrophy.  
Attn) MCI. Amnestic  
phs. observation  
J. Moon

\*\*\* Please do not write below the dotted line as it will be erased during scanning \*\*\*  
\*\*\* Please use the reverse side for additional information (turn sideways)

# Supplement 4 - Medical Record of The Seoul Municipal Boramae Hospital operated by Seoul National University Hospital

Psychiatric examination through a common protocol of the Center for Geriatric Dementia Clinical Research, Ministry of

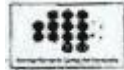

Health and Welfare (CRCD)

CRCD Common Protocol-Medical Questionnaire

## 10. CRCD\_Diagnostic Code

(Choose from diagnostic names in the table below)

|                 |     |                   |                 |
|-----------------|-----|-------------------|-----------------|
| Diagnosis Name1 | MCI | Date of Diagnosis | January 5, 2008 |
| Diagnosis Name2 |     |                   |                 |
| Diagnosis Name3 |     |                   |                 |

| 진 단 명 Diagnosis Name              |                                                                | Code                         |
|-----------------------------------|----------------------------------------------------------------|------------------------------|
| Alzheimer's disease               | Definite                                                       | AD without                   |
|                                   |                                                                | AD with small vessel disease |
|                                   |                                                                | AD with clinical stroke      |
|                                   |                                                                | AD with vascular factors     |
|                                   |                                                                | AD with parkinsonism         |
|                                   | Probable                                                       | AD without                   |
|                                   |                                                                | with small vessel disease    |
|                                   |                                                                | with clinical stroke         |
|                                   |                                                                | with vascular factors        |
|                                   |                                                                | with parkinsonism            |
|                                   | Possible                                                       | AD without                   |
|                                   |                                                                | with small vessel disease    |
|                                   |                                                                | with clinical stroke         |
|                                   |                                                                | with vascular factors        |
| Vascular dementia                 | Subcortical vascular dementia                                  | SVD                          |
|                                   | Multi-infarct dementia                                         | MID                          |
|                                   | Strategic infarct dementia                                     | SID                          |
|                                   | Multiple hemorrhagic dementia                                  | HMG                          |
| Frontotemporal lobar degeneration | Frontotemporal dementia                                        | FTD                          |
|                                   | Semantic Dementia                                              | SD                           |
|                                   | Progressive nonfluent aphasia                                  | PA                           |
| Other Degenerative disease        | Dementia with Lewy bodies                                      | DLB                          |
|                                   | Primary progressive aphasia                                    | PPA                          |
|                                   | Corticobasal ganglionic degeneration                           | CBD                          |
|                                   | Progressive supranuclear palsy                                 | PSP                          |
| Other Cognitive impairment        | Mild cognitive impairment                                      | MCI                          |
|                                   | Vascular cognitive impairment (Vascular MCI)                   | VCI                          |
|                                   | Cognitive impairment related with depression                   | CIRD                         |
|                                   | Cognitive impairment related with other psychiatric conditions | CIPC                         |
| Others                            | Normal pressure hydrocephalus                                  | NPH                          |
|                                   | Creutzfeldt-Jakob disease                                      | CJD                          |
|                                   | Subjective memory impairment                                   | SMI                          |
|                                   | Healthy (Control) subject                                      | Healthy subject              |

The attached copy certifies that the medical record is the same as the original. Output: Jung Chang Young / 2019-01-10 11:07:54



# Supplement 4 - Medical Record of The Seoul Municipal Boramae Hospital operated by Seoul National University Hospital

Psychiatric examination through a common protocol of the Center for Geriatric Dementia Clinical Research, Ministry of

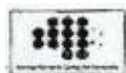

Health and Welfare (CRCD)

CRCD Common Protocol-Medical Questionnaire

## 6. Neurological examination

|                       |                        |
|-----------------------|------------------------|
| Aphasia               | (1. YES 2. <u>NO</u> ) |
| Hemianopia            | (1. YES 2. <u>NO</u> ) |
| EOM handicapped       | (1. YES 2. <u>NO</u> ) |
| Dysarthria            | (1. YES 2. <u>NO</u> ) |
| Dysphasia             | (1. YES 2. <u>NO</u> ) |
| Pathological laughing | (1. YES 2. <u>NO</u> ) |
| Pathological crying   | (1. YES 2. <u>NO</u> ) |
| Facial palsy          | (1. YES 2. <u>NO</u> ) |

|                            | Left                                     | Right                                    |
|----------------------------|------------------------------------------|------------------------------------------|
| Motor weakness, Upper limb | 1. YES 2. <u>NO</u>                      | 1. YES 2. <u>NO</u>                      |
| Motor weakness, Lower limb | 1. YES 2. <u>NO</u>                      | 1. YES 2. <u>NO</u>                      |
| Sensory loss, Upper limb   | 1. YES 2. <u>NO</u>                      | 1. YES 2. <u>NO</u>                      |
| Sensory loss, Lower limb   | 1. YES 2. <u>NO</u>                      | 1. YES 2. <u>NO</u>                      |
| Biceps                     | 1. Increase 2. <u>Normal</u> 3. Decrease | 1. Increase 2. <u>Normal</u> 3. Decrease |
| Triceps                    | 1. Increase 2. <u>Normal</u> 3. Decrease | 1. Increase 2. <u>Normal</u> 3. Decrease |
| Knee jerk                  | 1. Increase 2. <u>Normal</u> 3. Decrease | 1. Increase 2. <u>Normal</u> 3. Decrease |
| Ankle jerk                 | 1. Increase 2. <u>Normal</u> 3. Decrease | 1. Increase 2. <u>Normal</u> 3. Decrease |
| Babinski sign              | 1. YES 2. <u>NO</u>                      | 1. YES 2. <u>NO</u>                      |
| Chaddock                   | 1. YES 2. <u>NO</u>                      | 1. YES 2. <u>NO</u>                      |

## Extrapyramidal sign

|                           |                                                      |
|---------------------------|------------------------------------------------------|
| a) Resting tremor         | 1. YES 2. <u>NO</u>                                  |
| b) Postural tremor        | 1. YES 2. <u>NO</u>                                  |
| c) Rigidity, Upper limb   | 1. Yes 2. <u>None</u> 3. Left 4. Right 5. Both sides |
| d) Rigidity, Lower limb   | 1. Yes 2. <u>None</u> 3. Left 4. Right 5. Both sides |
| e) Rigidity, axial muscle | 1. YES 2. <u>NO</u>                                  |
| f) Bradykinesia           | 1. Yes 2. <u>None</u> 3. Left 4. Right 5. Both sides |

## Gait disorder

|                                      |                     |
|--------------------------------------|---------------------|
| a) Hemiplegic                        | 1. YES 2. <u>NO</u> |
| b) Ataxic                            | 1. YES 2. <u>NO</u> |
| c) Parkinsonian type                 | 1. YES 2. <u>NO</u> |
| - Arm swing decrease                 |                     |
| - Stooped posture                    |                     |
| - Shot step gait                     |                     |
| - Festination                        |                     |
| - Shuffling                          |                     |
| - Multi-step turning (pivot turning) |                     |

The attached copy certifies that the medical record is the same as the original. Output: Jung Chang Young / 2019-01-10 11:07:54



# Supplement 4 - Medical Record of The Seoul Municipal Boramae Hospital operated by Seoul National University Hospital

Psychiatric examination through a common protocol of the Center for Geriatric Dementia Clinical Research, Ministry of

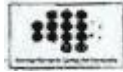

Health and Welfare (CRCD)

CRCD Common Protocol-Medical Questionnaire

## 7. Ischemia Scales

|    | Symptom                                              | Hachinski (1975) | Rosen (1980) |
|----|------------------------------------------------------|------------------|--------------|
| 1  | Abrupt onset (증상이 갑작스럽게 시작)                          | 2 X              | 2 X          |
| 2  | Stepwise deterioration (계단식으로 진행)                    | 1 X              | 2 X          |
| 3  | Fluctuating course (증상의 완곡이 있음)                      | 2 X              |              |
| 4  | Nocturnal confusion (야간성 혼동)                         | 1 X              |              |
| 5  | Relative preservation of personality (비교적 성격 변화가 없음) | 1 X              |              |
| 6  | Depression (우울증)                                     | 1 X              |              |
| 7  | Somatic complaint (신체적 불편을 호소함)                      | 1 X              | 1 X          |
| 8  | Emotional incontinence (정적 웃음 또는 병적 울음)              | 1 X              | 1 X          |
| 9  | History of hypertension (고혈압의 병력)                    | 0 X              | 1 X          |
| 10 | History of stroke (뇌졸중의 병력)                          | 2 X              | 2 X          |
| 11 | Associated atherosclerosis (동맥경화증이 동반됨)              | 1 X              |              |
| 12 | Focal neurological symptoms (국소 신경학적 증상)             | 2 X              | 2 X          |
| 13 | Focal neurological signs (국소 신경학적 징후)                | 2 X              | 2 X          |
|    | Total                                                | 20 / 18점         | 13 / 13점     |

|            |                             |      |      |
|------------|-----------------------------|------|------|
| evaluation | <u>Alzheimer's Dementia</u> | 0-4  | 0-2  |
|            | Borderline                  | 5-6  | 3    |
|            | Vascular Dementia           | 7-18 | 4-13 |

The attached copy certifies that the medical record is the same as the original. Output: Jung Chang Young / 2019-01-10 11:07:54

# Supplement 4 - Medical Record of The Seoul Municipal Boramae Hospital operated by Seoul National University Hospital

Psychiatric examination through a common protocol of the Center for Geriatric Dementia Clinical Research, Ministry of

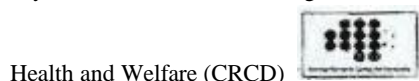

Health and Welfare (CRCD) CRCD Common Protocol-Medical Questionnaire

## 4. Medical Information for Patients

|                  |                                                                                               |                |                                                |
|------------------|-----------------------------------------------------------------------------------------------|----------------|------------------------------------------------|
| Eyesight         | <b>1 Normal</b> 2 Wearing glasses No problem in daily life 3 Glasses can interfere            |                |                                                |
| Hearing          | <b>1 Normal</b> 2 Hearing aids worn, no disruption to daily life 3 Hearing aids may interfere |                |                                                |
| Physical illness | DISEASE                                                                                       | TREATMENT TYPE |                                                |
|                  |                                                                                               | NO             | YES                                            |
|                  | 1. DM                                                                                         |                | 1 During treatment. 2 have been treated        |
|                  | 2. Hypertension                                                                               |                | <b>1 During treatment.</b> 2 have been treated |
|                  | 3. Hyperlipidemia                                                                             |                | 1 During treatment. 2 have been treated        |
|                  | 4. Heart Disease                                                                              |                | 1 During treatment. 2 have been treated        |
|                  | 5. Stroke                                                                                     |                | 1 During treatment. 2 have been treated        |
|                  | 6. Accidental brain injury                                                                    |                | 1 During treatment. 2 have been treated        |
|                  | 7. Carbon monoxide poisoning                                                                  |                | 1 During treatment. 2 have been treated        |
|                  | 8. Brain injury                                                                               |                | 1 During treatment. 2 have been treated        |
|                  | 9. Syphilis                                                                                   |                | 1 During treatment. 2 have been treated        |
|                  | 10. Thyroid disease                                                                           |                | 1 During treatment. 2 have been treated        |
|                  | 11. Encephalitis / Menitis                                                                    |                | 1 During treatment. 2 have been treated        |
|                  | 12. Liver disease (chronic hepatitis, cirrhosis of the liver)                                 |                | 1 During treatment. 2 have been treated        |
|                  | 13. Depression                                                                                |                | 1 During treatment. 2 have been treated        |
|                  | 14. Kidney Disease                                                                            |                | 1 During treatment. 2 have been treated        |
|                  | 15. Lung disease                                                                              |                | 1 During treatment. 2 have been treated        |
|                  | 16. Arthritis                                                                                 |                | 1 During treatment. 2 have been treated        |
|                  | 17. Dementia                                                                                  |                | 1 During treatment. 2 have been treated        |
|                  | 18. Anemia                                                                                    |                | 1 During treatment. 2 have been treated        |
|                  | 19. Chronic gastrointestinal disease                                                          |                | 1 During treatment. 2 have been treated        |
|                  | 20. Cancer                                                                                    |                | 1 During treatment. 2 have been treated        |
|                  | 21. Alcoholism                                                                                |                | 1 During treatment. 2 have been treated        |
|                  | 22. Epilepsy (convulsions)                                                                    |                | 1 During treatment. 2 have been treated        |
|                  | 23. Spinal compression fracture                                                               |                | 1 During treatment. 2 have been treated        |
|                  | 24. Limb fracture                                                                             |                | 1 During treatment. 2 have been treated        |
|                  | 25. Etc                                                                                       |                | 1 During treatment. 2 have been treated        |

The attached copy certifies that the medical record is the same as the original. Output: Jung Chang Young / 2019-01-10 11:07:54

# Supplement 4 - Medical Record of The Seoul Municipal Boramae Hospital operated by Seoul National University Hospital

Psychiatric examination through a common protocol of the Center for Geriatric Dementia Clinical Research, Ministry of

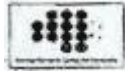

Health and Welfare (CRCD)

CRCD Common Protocol-Medical Questionnaire

|                    |                                                                                                                                                                                                                                                                                                                                                                                                                                                                                                                                                                                                                                                                                                                                                                                                                                                                                                                                                                                                                                                                               |
|--------------------|-------------------------------------------------------------------------------------------------------------------------------------------------------------------------------------------------------------------------------------------------------------------------------------------------------------------------------------------------------------------------------------------------------------------------------------------------------------------------------------------------------------------------------------------------------------------------------------------------------------------------------------------------------------------------------------------------------------------------------------------------------------------------------------------------------------------------------------------------------------------------------------------------------------------------------------------------------------------------------------------------------------------------------------------------------------------------------|
| Current Medication | <p>Are you currently on medication?<br/> <b><u>1 YES</u></b> 2 NO 3 Unknown</p> <p> If yes, please check your current medication</p> <div style="border: 1px solid black; padding: 5px;"> <input type="checkbox"/> Dementia Treatment<br/> <input type="checkbox"/> Diabetes medication<br/> <input checked="" type="checkbox"/> Hypertension drugs<br/> <input type="checkbox"/> Stroke pills<br/> <input type="checkbox"/> Heart pills<br/> <input type="checkbox"/> Psychoactive drugs<br/> <input type="checkbox"/> sleeping pills<br/> <input type="checkbox"/> Chinese medicine<br/> <input type="checkbox"/> Arthritis pills<br/> <input type="checkbox"/> Osteoporosis medicine<br/> <input type="checkbox"/> Hormonal agents<br/> <input type="checkbox"/> Vitamin<br/> <input type="checkbox"/> Asthma medicine<br/> <input type="checkbox"/> Peptic<br/> <input type="checkbox"/> Anti-inflammatory painkillers<br/> <input type="checkbox"/> Hyperlipidemia drugs         </div> |
|--------------------|-------------------------------------------------------------------------------------------------------------------------------------------------------------------------------------------------------------------------------------------------------------------------------------------------------------------------------------------------------------------------------------------------------------------------------------------------------------------------------------------------------------------------------------------------------------------------------------------------------------------------------------------------------------------------------------------------------------------------------------------------------------------------------------------------------------------------------------------------------------------------------------------------------------------------------------------------------------------------------------------------------------------------------------------------------------------------------|

The attached copy certifies that the medical record is the same as the original. Output: Jung Chang Young / 2019-01-10 11:07:54

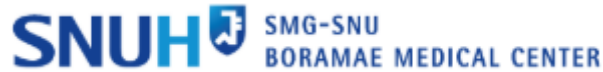

00838749 112 49504851 20080108 1 106

|                              |  |                        |                 |                    |                              |
|------------------------------|--|------------------------|-----------------|--------------------|------------------------------|
| Registration Number          |  | Medical department     | Psychiatry      | Medical doctor     | June-young Lee               |
| Name                         |  | Sex / Age              |                 | Date               | 2008.01.08                   |
| Resident registration number |  | Patient classification | Local insurance | Reception category | A reservation after visiting |

### History and Clinical Records

|                     |                                                                                                                                                     |       |      |         |
|---------------------|-----------------------------------------------------------------------------------------------------------------------------------------------------|-------|------|---------|
| 주 소:                | BP 139/94 PR 67                                                                                                                                     | 158cm | 62kg | 머리둘레 58 |
| chief complain      | Memory.                                                                                                                                             |       |      |         |
| 현병력:                | Edu - 6.<br>MMSE - 23.<br>CT-PATH = 45<br>COPR = 0.5 / 0.5 / 1.5<br>Not depressed<br>Alc.) R/O MCI. Amnesia etc.<br>Pls) (Anxiety)<br>Mental state. |       |      |         |
| 과거력: Past history   |                                                                                                                                                     |       |      |         |
| 가정력: Family history |                                                                                                                                                     |       |      |         |

\*\*\* Please use the reverse side for additional information (turn sideways) \*\*\*

The attached copy certifies that the medical record is the same as the original. Output: Jung Chang Young, 019-01-1011:07:54



00838749 1 12 49504851 20080108 1 106

Register : for prescription

처방:

수진등록하다.  
CBC+Diff. (01-06,09,12,12A,21-23) (Blood(EDTA))  
LIVER PANEL 1(08-12,14-16) (Blood(SST))  
Glucose (GLU) (Blood(SST))  
Electrolyte panel (43-45,47) (Blood(SST))  
Lipid panel A (08,61,62,99) (Blood(SST))  
VDRL qual. (Blood(Plain))  
TFT1-(T3,TSI,F,T4) (blood(plain))  
V.B12/Folate (blood(plain))  
Chest P-A  
Electrocardiogram(일반)  
(급이)Brain MRI

with T1 coronal view

The attached copy certifies that the medical record is the same as the original. Output: Jung Chang Young

2019-01-10 11:07:54

Dementia assessment

1. Biographic information

---

Registration Number :                      Name :                      Date and time : 2008-01-04

---

Sex :                      Age :                      Education :

---

2. Description of the patient (patient's test attitude, behavioral psychological symptoms, daily life, ...)

---

Consulted by Professor Lee June-young  
Auditor: Jung-Hye Yoon  
Recent memory loss is the chief complain. It has been blinking more than a year ago. The mind was comfortable and enjoyed with grandchildren.  
In the test, the memory function was not functioning well overall. Difficulty in performing the naming and language fluency tests, and the computational power was slightly reduced. It is reported that there is no inconvenience in daily life, suggesting a slight level or cognitive decline.

---

3. Screening (MMSE-KC)

| Time | Location | Memory Storage | Memory recall | Concentration | Language, Space | Decision | Total |
|------|----------|----------------|---------------|---------------|-----------------|----------|-------|
| 5    | 3        | 3              | 1             | 2             | 7               | 2        | 23    |
| 5    | 5        | 3              | 3             | 5             | 7               | 2        | 30    |

4. Comprehensive Cognitive Assessment (CERAD-K)

|              | Evaluation |                       | Perfect score | Average score, | execution score | cut point | Z value | Result   |
|--------------|------------|-----------------------|---------------|----------------|-----------------|-----------|---------|----------|
| Memory       | Lowering   | Word List Memory      | 30            | 16.2           | 10              | 9         | -1.5    | boundary |
|              |            | Word List Recall      | 30            | 5.7            | 2               | 2         | -1.9    | Lowering |
|              |            | Word List Replay      | 30            | 8.8            | 6i              | 5         | -1.8    | boundary |
|              |            | Composition recall    | 11            | 4.9            | 2               | 1.8       | -1.3    | boundary |
| Construction | normal     | Construction behavior | 11            | 9              | 10              | 5         | 0.53    | normal   |
| Execution    | boundary   | Language fluency      |               | 13.1           | 9               | 7         | -1.1    | boundary |

|        |        |                 |    |      |   |      |       |          |
|--------|--------|-----------------|----|------|---|------|-------|----------|
|        |        | Road Making A   | 24 | 52.6 |   | 99.5 | Error | boundary |
|        |        | Road Building B | 24 | 119  |   | 220  | Error | boundary |
| Naming | normal | Boston Naming   | 15 | 9.4  | 8 | 5    | -0.5  | normal   |

5. Dementia Stage Assessment (CDR)

|        |             |          |                 |               |         |       |
|--------|-------------|----------|-----------------|---------------|---------|-------|
| Memory | Orientation | Decision | Social Activity | Home Activity | Hygiene | Total |
| 0.5    | 0.5         | 0        | 0.5             | 0             | 0       | 0.5   |

6. Daily life assessment(ADL)

Everyday Activity Assessment-Basic: 0/24 Everyday Activity Assessment-Complex: 3/45

Everyday Activity Assessment-Potential : 3/45

7. Behavioral Symptoms Assessment

| Item                     | Yes/No | Frequency*Severity | Guardian pain degree |
|--------------------------|--------|--------------------|----------------------|
| Delusion                 | X      | 0                  | 0                    |
| Hallucination            | X      | 0                  | 0                    |
| Irritable/Aggressiveness | X      | 0                  | 0                    |
| Melancholy               | X      | 0                  | 0                    |
| Unrest                   | X      | 0                  | 0                    |
| Euphoria/Get loose       | X      | 0                  | 0                    |
| Apathy/Indifference      | X      | 0                  | 0                    |
| Deinhibition             | X      | 0                  | 0                    |
| Irritability/Instability | X      | 0                  | 0                    |
| Dyskinesia symptoms      | X      | 0                  | 0                    |
| Sleep/Night behavior     | X      | 0                  | 0                    |
| Appetite/Dietary Changes | X      | 0                  | 0                    |
| Sum                      | 0      | 0                  | 0                    |

8. Dementia Diagnosis

Dementia, probable (Questionable)

The attached copy certifies that the medical record is the same as the original. Output: Jung Chang Young 2019-01-10 11:07:54

# Supplement 4 - Medical Record of The Seoul Municipal Boramae Hospital operated by Seoul National University Hospital

The Seoul Municipal Boramae Hospital

operated by Seoul National University Hospital

## ECG test report

|                                                         |  |                     |                   |
|---------------------------------------------------------|--|---------------------|-------------------|
| Registration Number                                     |  | Medical department  | NP                |
| Name                                                    |  | Date of Examination | 2008.01.08        |
| Sex / Age                                               |  | Name of Examination | Electrocardiogram |
| Conclusion                                              |  |                     |                   |
| Normal Sinus Rhythm.                                    |  |                     |                   |
| Physician : 김상현 / 안선영<br>Sang-hyun Kim / Shin-young Ahn |  |                     |                   |

The attached copy certifies that the medical record is the same as the original. Output: Jung Chang Young 2019-01-10 11:07:54

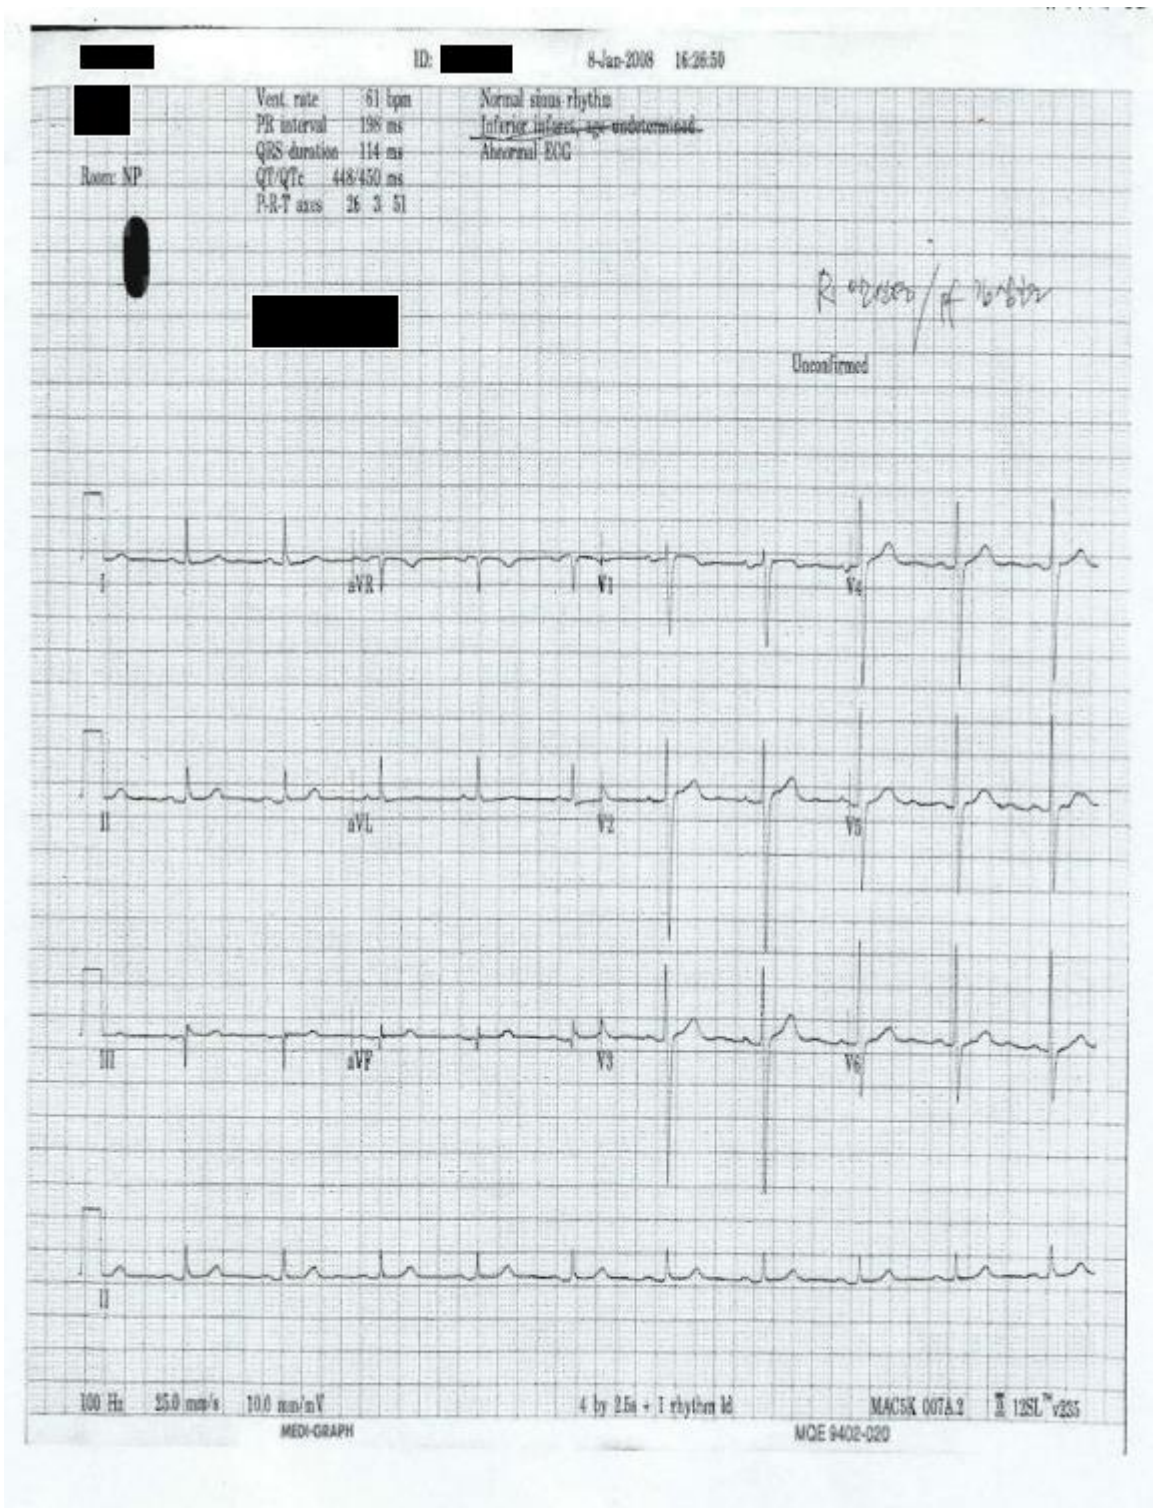

The attached copy certifies that the medical record is the same as the original. Output: Jung Chang Young, 2019-01-10 11:07:54



[Clinical Pathology Final Results Report ]

\* Registration Number                      \* Name                      \* Client of Medical department : NP

\* Check code \* R            \* Item Name            \* Result            \*Unit            \* Specimen            \* Reference

L51 Blood 1L01    '2008. 01. 29 13:25 \* Consulting doctor : June-young Lee \* Examiner : Min-sik Kim

L5105-00    VDRL, qual.    (    Non-reactive    )    Date    B(Plain)    NH-NB  
\*Ht    2:  
\*Remark:

The Seoul Municipal Boramae Hospital operated by Seoul National University Hospital

Report date    2008.01.30    Output date Reporter    2008.01.31    Director of Diagnostic Laboratory Medicine, Soo Shin

\* This laboratory guarantees the accuracy and reliability of the results as an excellent laboratory certified by the Korean Diagnostic Medical Association.

The attached copy certifies that the medical record is the same as the original. Output: Jung Chang Young /2019-01-10 11:07:54

[Clinical Pathology Final Results Report ]

\* Registration Number \* Name \* Client of Medical department : NP

\* Check code \* R \* Item Name \* Result \* Unit \* Specimen \* Reference

L20 Blood 2008.01.29-0280 13:07 \* Consulting doctor : June-young Lee \* Date : 2008.01.29 13:54 \* Examiner : Ji-hyun Ahn Reference

|           |                                |      |                             |         |                       |
|-----------|--------------------------------|------|-----------------------------|---------|-----------------------|
| L2001-00  | WBC(Leukocyte)                 | 4.50 | $\times 10^3 / \mu\text{L}$ | B(EDTA) | 4.0-10.0              |
| L2002-00  | RBC(Erythrocyte)               | 4.22 | $\times 10^6 / \mu\text{L}$ | B(EDTA) | M4.2-6.3 F4.0-5.4     |
| L2003-00  | Hb(Hemoglobin)                 | 13.5 | g/dL                        | B(EDTA) | M13.0-17.0 F12.0-16.0 |
| L2004-00  | Hct(Hematocrit)                | 39.4 | %                           | B(EDTA) | M39-52 F38-48         |
| L2009-00  | Platelet                       | 275  | $\times 10^3 / \mu\text{L}$ | B(EDTA) | 130-400               |
| L2005-00  | RDW                            | 12.8 | %                           | B(EDTA) | 0-14.5                |
| L2006-00  | PDW                            | 60.9 | %                           | B(EDTA) | 0-65                  |
| L2021-00  | MCV                            | 93.4 | fL                          | B(EDTA) | M81-96 F79-95         |
| L2022-00  | MCH                            | 32.0 | pg                          | B(EDTA) | M27-33 F26-32         |
| L2023-00  | MCHC                           | 34.3 | g/dL                        | B(EDTA) | 32-36                 |
| L2012-02  | Seg. Neutrophil                | 48   | %                           | B(EDTA) | 42.2-75.2             |
| L2012-03  | Lymphocyte                     | 44   | %                           | B(EDTA) | 20.5-51.1             |
| L2012-04  | Monocyte                       | 5    | %                           | B(EDTA) | 1.7-9.3               |
| L2012-05  | Eosinophil                     | 2    | %                           | B(EDTA) | 1.0-10.0              |
| L2012-06  | Basophil                       | 1    | %                           | B(EDTA) | 0.0-1.0               |
| L2012A-00 | ANC(Absolute Neutrophil Count) | 2160 | $/\text{mm}^3$              | B(EDTA) | 1500-7500             |

\*Remark:

L30 General Chemistry(1) 2008.01.29-0385 13:24 \* Consulting doctor : June-young Lee \* Date : 2008.01.29 15:12 \* Examiner : Sun-hee Choi Reference

|          |                                             |      |        |        |               |
|----------|---------------------------------------------|------|--------|--------|---------------|
| L3005-00 | Glucose (GLU)                               | 86   | mg/dL  | B(SST) | 70-110        |
| L3008-00 | Cholesterol (CHOL)                          | 200  | mg/dL  | B(SST) | 70-240        |
| L3009-00 | Protein, total (TP)                         | 7.0  | g/dL   | B(SST) | 6.0-8.0       |
| L3010-00 | Albumin (ALB)                               | 3.9  | g/dL   | B(SST) | 3.3-5.2       |
| L3011-00 | Bilirubin, total (TB)                       | 1.0  | mg/dL  | B(SST) | 0.2-1.2       |
| L3012-00 | Alk. phosphatase (ALP)                      | 97   | U/L    | B(SST) | 30-115        |
| L3014-00 | GOT(ALT)                                    | 31   | U/L    | B(SST) | 0-40          |
| L3015-00 | GPT(ALT)                                    | 27   | U/L    | B(SST) | 0-40          |
| L3016-00 | Gamma-GT (GGT)                              | 14   | U/L    | B(SST) | M11-63 F8-35  |
| L3043-00 | Sodium (Na)                                 | 144  | mmol/L | B(SST) | 135-145       |
| L3044-00 | Potassium (K)                               | 4.3  | mmol/L | B(SST) | 3.5-5.5       |
| L3045-00 | Chloride (Cl)                               | 106  | mmol/L | B(SST) | 98-110        |
| L3047-00 | CO <sub>2</sub> , total (TCO <sub>2</sub> ) | 27.8 | mmol/L | B(SST) | 24-31         |
| L3061-00 | Triglyceride (TG)                           | 107  | mg/dL  | B(SST) | 0-200         |
| L3062-00 | HDL-Cholesterol                             | 50   | mg/dL  | B(SST) | M35-55 F45-65 |
| L3069-00 | LDL-Cholesterol (계산)<br>Calculation         | 137  | mg/dL  | B(SST) | 0-130         |

\*Remark:

The Seoul Municipal Boramee Hospital operated by Seoul National University Hospital

Report date 2008.01.29 Output date Reporter 2008.01.30 Director of Diagnostic Laboratory Medicine, Soo Shin

\* This laboratory guarantees the accuracy and reliability of the results as an excellent laboratory certified by the Korean Diagnostic Medical Association.

The attached copy certifies that the medical record is the same as the original. Output: Jung Chang Young /2019-01-10 11:07:54

RADIOLOGIC REPORT

PATIENT :

BIRTH DATE :                      SEX :              NP/ June-young Lee

---

Examination : Chest P-A(2008.01.29)

[READING]

[RESULT]

No active lesions are seen.

RADIOLOGIST : Dae-hee Han

2008-01-30 오전 8:36:38  
AM

The attached copy certifies that the medical record is the same as the original. Output: Jung Chang Young  
/2019-01-10 11:07:54

RADIOLOGIC REPORT

PATIENT :

BIRTH DATE :                      SEX :              NP/ June-young Lee

Examination : (INSURANCE)

Brain MRI(2008.01.29)

[READING]

[RESULT]

Grade I small vessel disease involving both cerebral white matter, suggested.  
A few tiny lacunes at the rt. BG

RADIOLOGIST : Ji-hoon Kim

2008-01-30 오전 8:35:38  
AM

The attached copy certifies that the medical record is the same as the original. Output: Jung Chang Young  
/2019-01-10 11:07:54

Supplement 4 - Medical Record of The Seoul Municipal  
Boramae Hospital operated by Seoul National University Hospital

Nuclear medicine test report

Medical department : NP Type of treatment : OPD Doctor : June-young Lee

| Date<br>Legislation | of | Number | Test Name        | Sample name  | Result | Normal Range |
|---------------------|----|--------|------------------|--------------|--------|--------------|
| 20080129            |    | 114    | Triiodothyroxine | blood(plain) | 112    | 200-80       |
|                     |    |        | TSH              | blood(plain) | 1.73   | 4.1-0.4      |
|                     |    |        | Free.T4          | blood(plain) | 1.18   | 1.90-0.80    |
|                     |    |        | Vitamin B12      | blood(plain) | 585    | 950-200      |
|                     |    |        | Folate           | blood(plain) | 21.56  | 17-3         |

서울시립보라매병원

The Seoul Municipal Boramae Hospital operated by Seoul National University Hospital

The attached copy certifies that the medical record is the same as the original. Output: Jung Chang Young  
/2019-01-10 11:07:54



|      |    |       |
|------|----|-------|
| 등록번호 | 성명 | 성별/나이 |
|------|----|-------|

00838749 1 12 49504851 20080205 0 106

|               |       |     |      |                  |
|---------------|-------|-----|------|------------------|
| 등록번호          | 진료과   | 정신과 | 진료의  | 이준영              |
| 성명            | 나이/성별 |     | 진료일자 | 2008.02.05 11:15 |
| 주민등록번호        | 환자구분  | 지역  | 접수구분 | 내원 예약            |
| 331209-2***** |       |     |      |                  |

Patient

MMSE 23

MMSE = 23.

CEAD = 45

CDR = 0.5 / 0.5 / 1.5

MR 6d hippocampal atrophy.

hippocampal  
atrophy

MCI:mild cognitive  
impairment

(A44) MCI. Amnestic.

plus. observahn

updown

Sign of Pf. June-  
young Lee

\*\*\* 정선아래는 스캔시 지워지는 부분이므로 기재하지 마십시오 \*\*\*

\*\*\* 추가내용은 뒷면용 사용하십시오(옆으로 돌려주세요) \*\*\*

\*\*\* Please use the reverse side for additional information (turn sideways) \*\*\*



보건복지부 지정 노안성치매임상연구센터(CRCD)

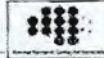

CRCD 공동프로토콜-의료진용 설문지

10. CRCD\_Diagnostic Code (아래 표의 진단명 가운데 선택)

|      |     |       |             |
|------|-----|-------|-------------|
| 진단명1 | MCI | 진단 일자 | 2008. 1. 15 |
| 진단명2 |     | 진단 일자 |             |
| 진단명3 |     | 진단 일자 |             |

January 5, 2008

| 진단명                               |                                                                | Code                         |
|-----------------------------------|----------------------------------------------------------------|------------------------------|
| Alzheimer's disease               | Definite                                                       | AD without                   |
|                                   |                                                                | AD with small vessel disease |
|                                   |                                                                | AD with clinical stroke      |
|                                   |                                                                | AD with vascular factors     |
|                                   | Probable                                                       | AD with parkinsonism         |
|                                   |                                                                | AD without                   |
|                                   |                                                                | with small vessel disease    |
|                                   |                                                                | with clinical stroke         |
|                                   | Possible                                                       | with vascular factors        |
|                                   |                                                                | with parkinsonism            |
|                                   |                                                                | AD without                   |
|                                   |                                                                | with small vessel disease    |
| Vascular dementia                 | Subcortical vascular dementia                                  | SVD                          |
|                                   | Multi-infarct dementia                                         | MID                          |
|                                   | Strategic infarct dementia                                     | SID                          |
|                                   | Multiple hemorrhagic dementia                                  | HMG                          |
| Frontotemporal lobar degeneration | Frontotemporal dementia                                        | FTD                          |
|                                   | Semantic Dementia                                              | SD                           |
|                                   | Progressive nonfluent aphasia                                  | PA                           |
| Other Degenerative disease        | Dementia with Lewy bodies                                      | DLB                          |
|                                   | Primary progressive aphasia                                    | PPA                          |
|                                   | Corticobasal ganglionic degeneration                           | CBD                          |
|                                   | Progressive supranuclear palsy                                 | RSP                          |
| Other Cognitive Impairment        | Mild cognitive impairment                                      | MCI                          |
|                                   | Vascular cognitive impairment (Vascular MCI)                   | VCI                          |
|                                   | Cognitive impairment related with depression                   | CIRD                         |
|                                   | Cognitive impairment related with other psychiatric conditions | CIPC                         |
| Others                            | Normal pressure hydrocephalus                                  | NPH                          |
|                                   | Creutzfeldt-Jakob disease                                      | CJD                          |
|                                   | Subjective memory impairment                                   | SMI                          |
|                                   | Healthy (Control) subject                                      | Healthy subject              |



보건복지부 지정 노인성치매임상연구센터(CRCD)

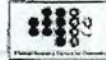

CRCD 공통프로토콜-외교진용 설문지

### 11. 환자 level 분류

| 환자 level 분류 Checklist                        |                                    | 예  | 아니오 |
|----------------------------------------------|------------------------------------|----|-----|
| 환자의 진단이 정상인, SMI, MCI, SVCI, AD, SVaD에 속합니까? |                                    |    |     |
| 피경사를 1년 이내                                   | IT4                                |    |     |
| 에 시행한 적이 있습니까?                               | TSH                                |    |     |
|                                              | VDR                                |    |     |
|                                              | Folate                             |    |     |
|                                              | Vitamin B12                        |    |     |
| MRI를 6개월 이내                                  | T2 axial                           |    |     |
| 에 촬영하였습니까?                                   | FLAIR axial                        |    |     |
|                                              | T1 axial                           |    |     |
|                                              | T1 coronal                         |    |     |
|                                              | Gradient Echo (SVaD, SVCI인 경우만 해당) |    |     |
| 신경심리검사를 6개월 이내에 실시하였습니까?                     |                                    |    |     |
| CRCD의 D-table 12개 cell중 하나에 해당이 됩니까?         |                                    |    |     |
| 환자 level 분류:                                 |                                    | 1. |     |

### 12. D-Table 작성 (Level 1,2에 해당되는 환자만 작성)

- 인지장애 정도

|                      |   |
|----------------------|---|
| Normal               |   |
| MCI                  | ✓ |
| Mild to mod dementia |   |
| Severe dementia      |   |

- Ischemic changes

|                                       | D1 (<10 mm) | D2 (10-25 mm) | D3 (>25 mm) |
|---------------------------------------|-------------|---------------|-------------|
| P1 (Capping/Banding 둘다 5mm이하)         | Minimal ✓   | Minimal       | Moderate    |
| P2 (P1-P3사이)                          | Minimal     | Moderate      | Moderate    |
| P3 (Capping/Banding 둘 중 하나라도 10 mm이상) | Minimal     | Moderate      | Severe      |

| 인지장애 정도                   | Small vessel disease in MRI |          |        |
|---------------------------|-----------------------------|----------|--------|
|                           | < minimal                   | moderate | severe |
| No cognitive impairment   | I-1                         | I-2      | I-3    |
| Mild cognitive impairment | II-1 ✓                      | II-2     | II-3   |
| Mild to moderate dementia | III-1                       | III-2    | III-3  |
| Severe dementia           | IV-1                        | IV-2     | IV-3   |



보건복지부지정 노인성치매임상연구센터(CRCD)

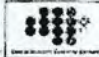

CRCD 공통프로토콜 - 의료진용 설문지

6. 신경학적 검사

(신경학적 검사에 대한 설명은 별첨)

|                       |               |
|-----------------------|---------------|
| Aphasia               | (1. 있음 2. 없음) |
| Hemianopia            | (1. 있음 2. 없음) |
| EOH 감지                | (1. 있음 2. 없음) |
| Dysarthria            | (1. 있음 2. 없음) |
| Dysphagia             | (1. 있음 2. 없음) |
| Pathological laughing | (1. 있음 2. 없음) |
| Pathological crying   | (1. 있음 2. 없음) |
| Facial palsy          | (1. 있음 2. 없음) |

|                    | 좌                 | 우                 |
|--------------------|-------------------|-------------------|
| Motor weakness, 상지 | 1. 있음 2. 없음       | 1. 있음 2. 없음       |
| Motor weakness, 하지 | 1. 있음 2. 없음       | 1. 있음 2. 없음       |
| Sensory loss, 상지   | 1. 있음 2. 없음       | 1. 있음 2. 없음       |
| Sensory loss, 하지   | 1. 있음 2. 없음       | 1. 있음 2. 없음       |
| Biceps             | 1. 증가 2. 정상 3. 감소 | 1. 증가 2. 정상 3. 감소 |
| Triceps            | 1. 증가 2. 정상 3. 감소 | 1. 증가 2. 정상 3. 감소 |
| Knee jerk          | 1. 증가 2. 정상 3. 감소 | 1. 증가 2. 정상 3. 감소 |
| Ankle jerk         | 1. 증가 2. 정상 3. 감소 | 1. 증가 2. 정상 3. 감소 |
| Babinski sign      | 1. 있음 2. 없음       | 1. 있음 2. 없음       |
| Chaddock           | 1. 있음 2. 없음       | 1. 있음 2. 없음       |

Extrapyramidal sign

|                           |                               |
|---------------------------|-------------------------------|
| a) Resting tremor         | (1. 있음 2. 없음)                 |
| b) Postural tremor        | (1. 있음 2. 없음)                 |
| c) Rigidity, 상지           | (1. 있음 2. 없음 3. 좌 4. 우 5. 양측) |
| d) Rigidity, 하지           | (1. 있음 2. 없음 3. 좌 4. 우 5. 양측) |
| e) Rigidity, axial muscle | (1. 있음 2. 없음)                 |
| f) Bradykinesia           | (1. 있음 2. 없음 3. 좌 4. 우 5. 양측) |

Gait disorder

|                                      |               |
|--------------------------------------|---------------|
| a) Hemiplegic                        | (1. 있음 2. 없음) |
| b) Ataxic                            | (1. 있음 2. 없음) |
| c) Parkinsonian type                 | (1. 있음 2. 없음) |
| - arm swing 감소                       | (1. 있음 2. 없음) |
| - stooped posture                    | (1. 있음 2. 없음) |
| - short step gait                    | (1. 있음 2. 없음) |
| - festination                        | (1. 있음 2. 없음) |
| - shuffling                          | (1. 있음 2. 없음) |
| - multi-step turning (pivot turning) | (1. 있음 2. 없음) |



보건복지부 지정 노인성치매임상연구센터(CRCD)

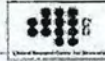

CRCD 공통표준도움-의료진용 설문지

# 7. Ischemia Scales

|    | 증상                                                   | Hachinski (1975) |    | Rosen (1980) |    |
|----|------------------------------------------------------|------------------|----|--------------|----|
|    |                                                      | 점수               | 유무 | 점수           | 유무 |
| 1  | Abrupt onset (증상이 갑작스럽게 시작)                          | 2                | X  | 2            | X  |
| 2  | Stepwise deterioration (계단식으로 진행)                    | 1                | X  | 2            | X  |
| 3  | Fluctuating course (증상의 완곡이 있음)                      | 2                | X  |              |    |
| 4  | Nocturnal confusion (야간성 혼돈)                         | 1                | X  |              |    |
| 5  | Relative preservation of personality (비교적 성격 변화가 없음) | 1                | X  |              |    |
| 6  | Depression (우울증)                                     | 1                | X  |              |    |
| 7  | Somatic complaint (신체적 불편을 호소함)                      | 1                | X  | 1            | X  |
| 8  | Emotional incontinence (평적 웃음 또는 병적 울음)              | 1                | X  | 1            | X  |
| 9  | History of hypertension (고혈압의 병력)                    | 0                | X  | 1            | X  |
| 10 | History of stroke (뇌졸중의 병력)                          | 2                | X  | 2            | X  |
| 11 | Associated atherosclerosis (동맥경화증이 동반됨)              | 1                | X  |              |    |
| 12 | Focal neurological symptoms (국소 신경학적 증상)             | 2                | X  | 2            | X  |
| 13 | Focal neurological signs (국소 신경학적 징후)                | 2                | X  | 2            | X  |
| 총점 |                                                      | 20 / 10점         |    | 13점          |    |
| 평가 | 알츠하이머형 치매                                            | 0-4              |    | 0-2          |    |
|    | Borderline                                           | 5-6              |    | 3            |    |
|    | 혈관성 치매                                               | 7-18             |    | 4-13         |    |



보건복지부 지정 노인성치매임상연구센터(CRCD)

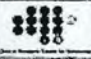

CRCD 공통프로토콜-보호자용 설문지

4. 환자에 대한 의학정보

|           |                       |                       |                   |                                                       |
|-----------|-----------------------|-----------------------|-------------------|-------------------------------------------------------|
| 시력        | ① 정상                  | ② 안경 쓰고 일상생활 지장 없음    | ③ 안경 써도 지장이 있음    | problem in daily life 3 Glasses can interfere         |
| 청력        | ① 정상                  | ② 보청기 착용하고 일상생활 지장 없음 | ③ 보청기 착용해도 지장이 있음 | disruption to daily life 3 Hearing aids may interfere |
| 신체질환      | 병명                    | 없음                    | 있음                | 있을 적이 있음                                              |
|           | 치료현태                  |                       |                   |                                                       |
|           | 1. 당뇨                 |                       |                   | ① 치료 중 ② 치료한 적 있음                                     |
|           | 2. 고혈압                |                       |                   | ① 치료 중 ② 치료한 적 있음                                     |
|           | 3. 고지혈증               |                       |                   | ① 치료 중 ② 치료한 적 있음                                     |
|           | 4. 심장질환               |                       |                   | ① 치료 중 ② 치료한 적 있음                                     |
|           | 5. 중풍                 |                       |                   | ① 치료 중 ② 치료한 적 있음                                     |
|           | 6. 사고로 인한 뇌손상         |                       |                   | ① 치료 중 ② 치료한 적 있음                                     |
|           | 7. 일산화탄소중독            |                       |                   | ① 치료 중 ② 치료한 적 있음                                     |
|           | 8. 뇌수술                |                       |                   | ① 치료 중 ② 치료한 적 있음                                     |
|           | 9. 해독                 |                       |                   | ① 치료 중 ② 치료한 적 있음                                     |
|           | 10. 갑상선 질환            |                       |                   | ① 치료 중 ② 치료한 적 있음                                     |
|           | 11. 뇌염/뇌막염            |                       |                   | ① 치료 중 ② 치료한 적 있음                                     |
|           | 12. 간장 질환(만성 간염, 간경화) |                       |                   | ① 치료 중 ② 치료한 적 있음                                     |
|           | 13. 우울증               |                       |                   | ① 치료 중 ② 치료한 적 있음                                     |
|           | 14. 신장질환(콩팥)          |                       |                   | ① 치료 중 ② 치료한 적 있음                                     |
|           | 15. 폐질환               |                       |                   | ① 치료 중 ② 치료한 적 있음                                     |
|           | 16. 관절염               |                       |                   | ① 치료 중 ② 치료한 적 있음                                     |
|           | 17. 치매                |                       |                   | ① 치료 중 ② 치료한 적 있음                                     |
|           | 18. 빈혈                |                       |                   | ① 치료 중 ② 치료한 적 있음                                     |
|           | 19. 만성 위장 질환          |                       |                   | ① 치료 중 ② 치료한 적 있음                                     |
|           | 20. 암                 |                       |                   | ① 치료 중 ② 치료한 적 있음                                     |
|           | 21. 알코올 중독            |                       |                   | ① 치료 중 ② 치료한 적 있음                                     |
|           | 22. 간질(경련)            |                       |                   | ① 치료 중 ② 치료한 적 있음                                     |
|           | 23. 척추 압박 골절          |                       |                   | ① 치료 중 ② 치료한 적 있음                                     |
| 24. 사지 골절 |                       |                       | ① 치료 중 ② 치료한 적 있음 |                                                       |
| 25. 기타( ) |                       |                       | ① 치료 중 ② 치료한 적 있음 |                                                       |



보건복지부 지정 노인성치매임상연구센터(CRCO)

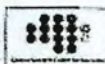

CRCO 공통프로토콜-보호자용 설문지

현재 투약 중인 약물이 있습니까?

① 있다 ② 없다 ③ 알 수 없음

1 YES 2 NO 3 Unknown

If yes, please check your current medication

만일 있다면, 현재 복용 중인 약을 체크해주세요

- |                                          |                                 |
|------------------------------------------|---------------------------------|
| <input type="checkbox"/> 치매 치료제          | Diabetes medication             |
| <input type="checkbox"/> 당뇨병             | Hypertension drugs              |
| <input checked="" type="checkbox"/> 고혈압약 | Stroke pills                    |
| <input type="checkbox"/> 뇌졸중약            | Heart pills                     |
| <input type="checkbox"/> 심장약             | Psychoactive drugs              |
| <input type="checkbox"/> 정신작용약물          | sleeping pills                  |
| <input type="checkbox"/> 수면제             | Chinese medicine                |
| <input type="checkbox"/> 한약              | Arthritis pills                 |
| <input type="checkbox"/> 관절염약            | Osteoporosis medicine           |
| <input type="checkbox"/> 골다공증약           | Hormonal agents                 |
| <input type="checkbox"/> 호르몬제            | Vitamin                         |
| <input type="checkbox"/> 비타민제            | Asthma medicine                 |
| <input type="checkbox"/> 천식약             | Peptic                          |
| <input type="checkbox"/> 소화제             | Anti - inflammatory painkillers |
| <input type="checkbox"/> 소염 진통제          | Hyperlipidemia drugs            |
| <input type="checkbox"/> 고지혈증 약          | Other ( )                       |
| <input type="checkbox"/> 기타 ( )          |                                 |



00838749 1 12 49504851 20080108 1 106

|        |          |       |           |       |            |
|--------|----------|-------|-----------|-------|------------|
| 등록번호   |          | 진료과   | 정신과       | 진료의   | 이준영        |
| 성명     |          | 나이/성별 |           | 진료일자  | 2008.01.08 |
| 주민등록번호 | 331209-2 | 환자구분  | 지역        | 접수구분  | 당일 진료      |
| 주소     | 전북 남원시   |       | insurance |       |            |
|        |          |       |           | (H.P) |            |
|        |          |       |           | (전화)  |            |

### 병력 및 임상 소견 기록지

chief  
complai

illness

histor

historv

주 소: BP 139/94 PR 67 158cm 62kg 머리둘레 58

Memory.

Edu - 6.

현 병 력: MMSE-23.

CEPAP = 45

COR = 0.5 / 0.5 / 1.5

Not depressive

Alc) 2/0 MCI. Amnesia.

ph) (MCI)

MCI. MCI.

보조.

과 거 력:

가 정 력:

\*\*\* 추가내용은 뒷면을 사용하십시오(옆으로 돌려주세요) \*\*\*



00838749 1 12 49504851 20080108 1 106

치 방 :

수치등록하다.

CBC+Diff. (01-06,09,12,12A,21-23) (Blood(EDTA))

LIVER PANEL 1(08-12,14-16) (Blood(SST))

Glucose (GLU) (Blood(SST))

Electrolyte panel (43-45,47) (Blood(SST))

Lipid panel A (08,61,62,99) (Blood(SST))

VDH, qual. (Blood(Plain))

TFT1-(T3,ISH,F,T4) (blood(plain))

V.B12/Folate (blood(plain))

Chest P-A

Electrocardiogram(알벤)

(급어)Brain MRI with T1 coronal view

## 치매 평가

### 1. 연구학적 정보

Number

|         |           |       |            |
|---------|-----------|-------|------------|
| 병력번호:   | 이름: ■■■   | 면담일자: | 2008-01-04 |
| 성별: ■■■ | 연령: ■■■ 세 | 교육연한: | 6 년        |

### 2. 환자에 대한 기술 (환자의 검사태도, 행동심리증상, 일상생활정도, ...)

이 준영교수님 의뢰  
검사자: 윤 정혜

behavioral psychological svmptoms, daily life. ...)

최근 기억력 저하가 주소임. 1년 전 부터 깜박깜박하는 일이 잦아졌다고 함. 마음은 편안하고, 손주와 함께 지내 즐겁다고 하였음.

검사에서, 기억 기능이 전반적으로 원활하게 기능하고 있지 않았음. 이름대기와 언어 유창성 검사 수행에 어려움이었고, 계산력이 다소 저하되어 있었으나, 일상생활에서 불편함이 없다고 보고되어, 경미한 수준이나 인지적 저하가 시사되고 있음.

Auditor: Jung - Hye Yoon

Recent memory loss is the chief complain. It has been blinking more than a year ago. The mind was comfortable and enjoyed with grandchildren.

In the test, the memory function was not functioning well overall. Difficulty in performing the naming and language fluency tests, and the computational power was slightly reduced. It is reported that there is no inconvenience in daily life, suggesting a slight level or cognitive decline.

### 3. 선별검사 (MMSE-KC)

| 시간 | 장소 | 기억저장 | 기억회상 | 집중력 | 언어,공간 | 판단 | 총점 |
|----|----|------|------|-----|-------|----|----|
| 5  | 3  | 3    | 1    | 2   | 7     | 2  | 23 |
| 5  | 5  | 3    | 3    | 5   | 7     | 2  | 30 |

MMSE 23

### 4. 종합인지평가 (CERAD-KO)

|              | 평가 |         | 만점 | 평균점  | 실행점수 | 절단점  | Z 값    | 결과 |
|--------------|----|---------|----|------|------|------|--------|----|
| Memory       | 저하 | 단어목록기억  | 30 | 16.2 | 10   | 9    | -1.5   | 경계 |
|              |    | 단어목록회상  | 30 | 5.7  | 2    | 2    | -1.9   | 저하 |
|              |    | 단어목록재인  | 30 | 8.8  | 6    | 5    | -1.8   | 경계 |
|              |    | 구성회상    | 11 | 4.9  | 2    | 1.8  | -1.3   | 경계 |
| Construction | 정상 | 구성행동    | 11 | 9    | 10   | 5    | 0.53   | 정상 |
| Execution    | 경계 | 언어유창성   |    | 13.1 | 9    | 7    | -1.1   | 경계 |
|              |    | 길만들기A   | 24 | 52.6 |      | 99.5 | #Error | 경계 |
|              |    | 길만들기B   | 24 | 119  |      | 220  | #Error | 경계 |
| Naming       | 정상 | 보스톤이름대기 | 15 | 9.4  | 8    | 5    | -0.5   | 정상 |

Word List Recall  
Word List Replay  
Composition recall  
Construction behavior  
Language fluency  
Road Making A  
Road Building B  
Boston Naming

Lowering  
boundary  
boundary  
normal  
boundary  
boundary  
boundary  
normal

449



Summary

5. 치매단계 평가 (CDR)

| 기억력 | 지남력 | 판단 | 사회활동 | 집안생활 | 위생 | 총합  |
|-----|-----|----|------|------|----|-----|
| 0.5 | 0.5 | 0  | 0.5  | 0    | 0  | 0.5 |

6. 일상활동평가

|            |      |            |      |            |      |
|------------|------|------------|------|------------|------|
| 일상활동평가-기초: | 0/24 | 일상활동평가-복합: | 3/45 | 일상활동평가-잠재: | 3/45 |
|------------|------|------------|------|------------|------|

7. 행동증상평가

| 항목        | 예/아니오 | 빈도*심각도 | 보호자고동정도 |
|-----------|-------|--------|---------|
| 당상        | X     | 0      | 0       |
| 환각        | X     | 0      | 0       |
| 호조/공격성    | X     | 0      | 0       |
| 우울/낙담     | X     | 0      | 0       |
| 불안        | X     | 0      | 0       |
| 다행감/들뜬기분  | X     | 0      | 0       |
| 무감동/무관심   | X     | 0      | 0       |
| 탈억제       | X     | 0      | 0       |
| 파진/불안정    | X     | 0      | 0       |
| 이상운동증상    | X     | 0      | 0       |
| 수면/야간행동   | X     | 0      | 0       |
| 식욕/식습관 변화 | X     | 0      | 0       |
| 총점        | 0     | 0      | 0       |

8. 치매진단

Dementia, probable (Questionable)

서울대학교병원운영  
서울보라매병원

## 심전도 검사보고서

|       |       |       |                       |
|-------|-------|-------|-----------------------|
| 병력번호  | ■■■■■ | 의 료 처 | NP                    |
| 환 자 명 | ■■■   | 검 사 일 | 2008.01.08            |
| 연령/성별 | ■■■■■ | 검 사 명 | Electrocardiogram(일반) |

결 론 :

Normal Sinus Rhythm.

Physician : 김상현 / 안선영



ID: [REDACTED] 8-Jan-2008 16:26:50

Room: NP

Vent. rate 61 bpm  
PR interval 198 ms  
QRS duration 114 ms  
QT/QTc 448/450 ms  
P-R-T axes 26 3 51

Normal sinus rhythm  
~~Inferior infarct, age undetermined~~  
Abnormal ECG

R. [REDACTED] / [REDACTED]  
Unconfirmed

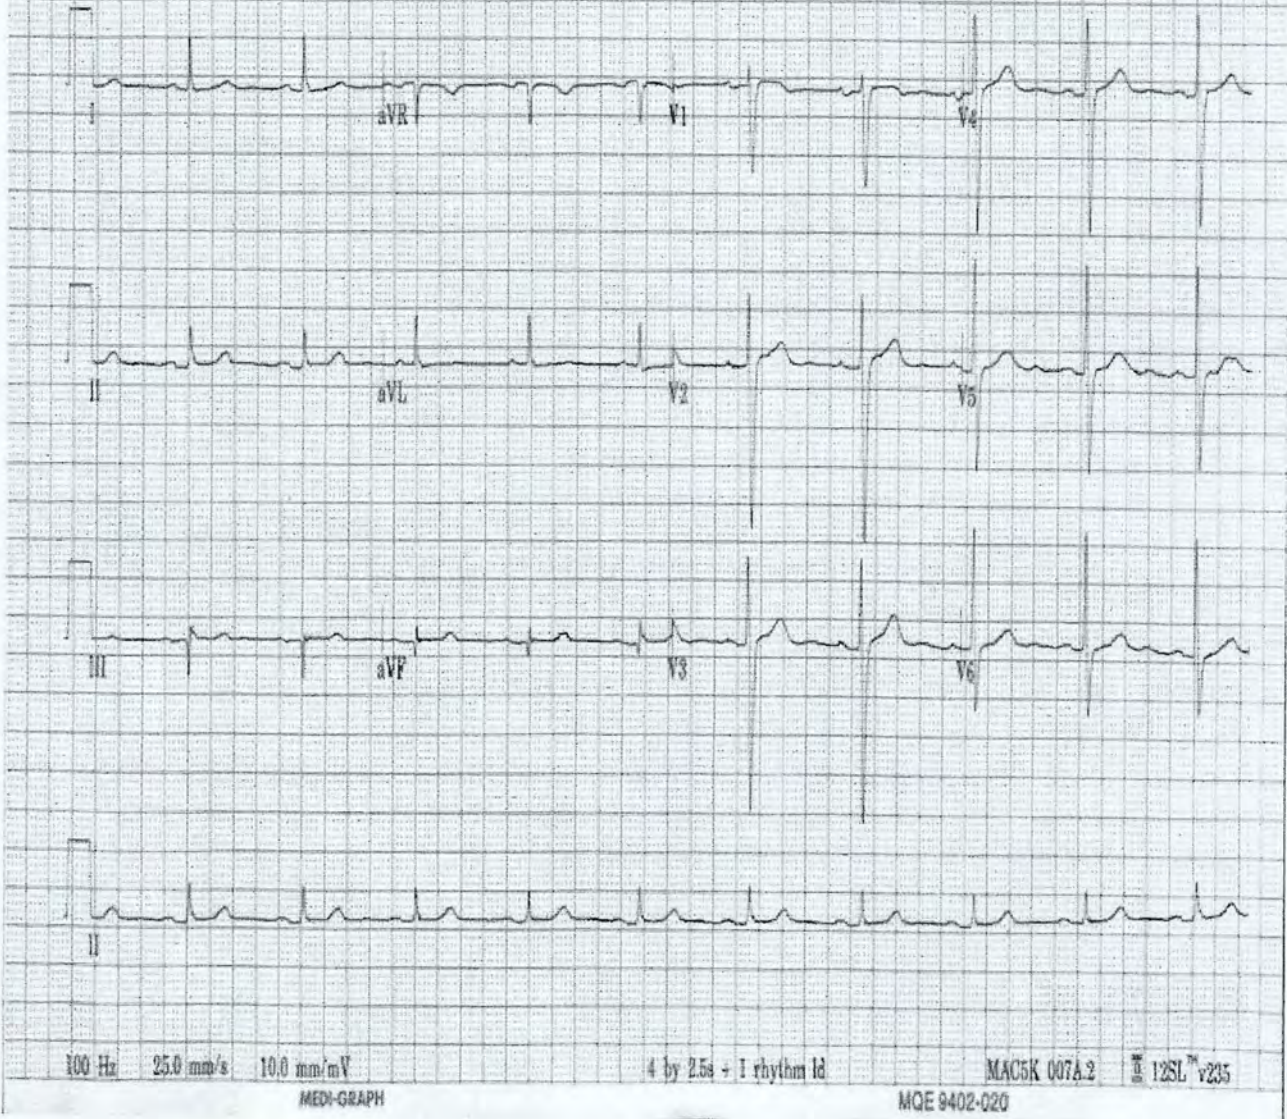



[ 임상병리검사 최종 결과보고서 ]

|                     |                       |                    |      |                         |            |
|---------------------|-----------------------|--------------------|------|-------------------------|------------|
| * 병록번호 : [REDACTED] |                       | * 환자명 : [REDACTED] |      | * 의뢰처 : NP              |            |
| * 검사코드              | * 항목명                 | * 결과               | * 단위 | * 검체                    | * 참고치(성인)  |
| L51-혈청              | 2008.01.29-2952 13:25 | *검사의뢰의사 : NP 이준영   |      | *검시일 : 2008.01.30 17:10 | *검시자 : 김민석 |
| L5105-00            | VDRL, qual.           | ( Non-reactive )   |      | B(Plain)                | NR-NR      |
| *비 고:               |                       |                    |      |                         |            |
| *Remark:            |                       |                    |      |                         |            |

|                                                             |                  |                    |
|-------------------------------------------------------------|------------------|--------------------|
| 보고일 : 2008.01.30                                            | 출력일 : 2008.01.31 | 보고자 : 진단검사의학과장 신 수 |
| 검사실 : [REDACTED]                                            |                  | Shin               |
| *본 검사실은 대한진단검사의학회의 실험 인증을 받은 우수검사실로서의 결과의 정확성 및 신뢰도를 보증합니다* |                  |                    |

[ 임상병리검사 최종 결과보고서 ]

\* 병력번호 : \* 환자명 : \* 의뢰처 : NP

| * 검사코드    | * 항목명                          | * 결과             | * 단위                              | * 검체       | * 참고치(성인)             |
|-----------|--------------------------------|------------------|-----------------------------------|------------|-----------------------|
| L20-일반혈액  | 2008.01.29-0280 13:07          | *검사의뢰의사 : NP 이준영 | *검사일 : 2008.01.29 13:54           | *검사지 : 안지현 |                       |
| L2001-00  | WBC(Leukocyte)                 | (                | 4.50) $\times 10^3 / \mu\text{L}$ | B(EDTA)    | 4.0-10.0              |
| L2002-00  | RBC(Erythrocyte)               | (                | 4.22) $\times 10^6 / \mu\text{L}$ | B(EDTA)    | M4.2-6.3 F4.0-5.4     |
| L2003-00  | Hb(Hemoglobin)                 | (                | 13.5) g/dL                        | B(EDTA)    | M13.0-17.0 F12.0-16.0 |
| L2004-00  | Hct(Hematocrit)                | (                | 39.4) %                           | B(EDTA)    | M39-52 F38-48         |
| L2009-00  | Platelet                       | (                | 275) $\times 10^3 / \mu\text{L}$  | B(EDTA)    | 130-400               |
| L2005-00  | RDW                            | (                | 12.8) %                           | B(EDTA)    | 0-14.5                |
| L2006-00  | PDW                            | (                | 60.9) %                           | B(EDTA)    | 0-65                  |
| L2021-00  | MCV                            | (                | 93.4) fL                          | B(EDTA)    | M81-96 F79-95         |
| L2022-00  | MCH                            | (                | 32.0) pg                          | B(EDTA)    | M27-33 F26-32         |
| L2023-00  | MCHC                           | (                | 34.3) g/dL                        | B(EDTA)    | 32-36                 |
| L2012-02  | Seg. Neutrophil                | (                | 48) %                             | B(EDTA)    | 42.2-75.2             |
| L2012-03  | Lymphocyte                     | (                | 44) %                             | B(EDTA)    | 20.5-51.1             |
| L2012-04  | Monocyte                       | (                | 5) %                              | B(EDTA)    | 1.7-9.3               |
| L2012-05  | Eosinophil                     | (                | 2) %                              | B(EDTA)    | 1.0-10.0              |
| L2012-06  | Basophil                       | (                | 1) %                              | B(EDTA)    | 0.0-1.0               |
| L2012A-00 | ANC(Absolute Neutrophil Count) | (                | 2160) /mm <sup>3</sup>            | B(EDTA)    | 1500-7500             |

\*비 고:

\*Remark:

|             |                        |                  |                         |            |               |
|-------------|------------------------|------------------|-------------------------|------------|---------------|
| L30-일반화학(1) | 2008.01.29-0385 13:24  | *검사의뢰의사 : HP 이준영 | *검사일 : 2008.01.29 15:12 | *검사지 : 최선화 |               |
| L3005-00    | Glucose (GLU)          | (                | 86) mg/dL               | B(SST)     | 70-110        |
| L3008-00    | Cholesterol (CHOL)     | (                | 208) mg/dL              | B(SST)     | 70-240        |
| L3009-00    | Protein, total (TP)    | (                | 7.0) g/dL               | B(SST)     | 6.0-8.0       |
| L3010-00    | Albumin (ALB)          | (                | 3.9) g/dL               | B(SST)     | 3.3-5.2       |
| L3011-00    | Bilirubin, total (TB)  | (                | 1.0) mg/dL              | B(SST)     | 0.2-1.2       |
| L3012-00    | Alk. phosphatase (ALP) | (                | 97) IU/L                | B(SST)     | 30-115        |
| L3014-00    | GOT(AST)               | (                | 31) IU/L                | B(SST)     | 0-40          |
| L3015-00    | GPT(ALT)               | (                | 27) IU/L                | B(SST)     | 0-40          |
| L3016-00    | Gamma-GT (GGT)         | (                | 14) IU/L                | B(SST)     | M11-63 F8-35  |
| L3043-00    | Sodium (Na)            | (                | 144) mmol/L             | B(SST)     | 135-145       |
| L3044-00    | Potassium (K)          | (                | 4.3) mmol/L             | B(SST)     | 3.5-5.5       |
| L3045-00    | Chloride (Cl)          | (                | 106) mmol/L             | B(SST)     | 98-110        |
| L3047-00    | CO2, total (TCO2)      | (                | 27.8) mmol/L            | B(SST)     | 24-31         |
| L3061-00    | Triglyceride (TG)      | (                | 107) mg/dL              | B(SST)     | 0-200         |
| L3062-00    | HDL-Cholesterol        | (                | 50) mg/dL               | B(SST)     | M35-65 F45-65 |
| L3069-00    | LDL-Cholesterol(계산)    | (                | 137) mg/dL              | B(SST)     | 0-130         |

\*비 고:

\*Remark:

보고일 : 2008.01.29

출력일 : 2008.01.30

보고자 : 진단검사의학과장 신 수

Shin

\*본 검사실은 대한진단검사의학회의 선임 인증을 받은 우수검사실로서의 결과의 정확성 및 선별도를 보증합니다.\*



방사선 판독지

환 자 : [REDACTED]  
생년월일 : [REDACTED] 성별 : [REDACTED]

NP/이준영 -----

검사명 : Chest P-A(2008.01.29)

[판독문]

[결 론]

No active lesions are seen.

판독의사 : 한대희 / /

2008-01-30 오전 8:36:38



방사선 판독지

환 자 : [REDACTED]

생년월일 : [REDACTED]

성별 : [REDACTED]

NP/이준영

검사명 : (급여)Brain MRI(2008.01.29)

[판독문]

[결론]

Grade I small vessel disease involving both cerebral white matter, suggested.

A few tiny lacunes at the rt. BG

판독의사 : 김지훈 / /

2008-01-30 오전 8:35:38

# 혈액화학검사보고서

진료단위 : NP

진료형태 : 외래

발행의 : 이준영

병록번호 : [REDACTED]

환자명 : [REDACTED]

| 접수일      | 번호  | 검사명              | 검체명          | 검사결과  | 정상범위      |
|----------|-----|------------------|--------------|-------|-----------|
| 20080129 | 114 | Triiodothyroxine | blood(plain) | 112   | 200-80    |
|          |     | TSH              | blood(plain) | 1.73  | 4.1-0.4   |
|          |     | Free.T4          | blood(plain) | 1.18  | 1.90-0.80 |
|          |     | Vitamin B12      | blood(plain) | 585   | 950-200   |
|          |     | Folate           | blood(plain) | 21.56 | 17-3      |

서울시립보라매병원
