# Supplementary material
Source: publisher figshare collection journal article supplement (https://karger.figshare.com/articles/dataset/_/11671407)
Supplement: Supplementary file 5 [file 1]

Supplement 6 - Medical record of  
Dobong General Hospital and Kyunghee Neulfureun Geriatric Hospital

Medical Report

File Number :

Patient Number

Patient

|                                                                                       |                                                                                                                                                                                |
|---------------------------------------------------------------------------------------|--------------------------------------------------------------------------------------------------------------------------------------------------------------------------------|
| Address                                                                               |                                                                                                                                                                                |
| Name                                                                                  |                                                                                                                                                                                |
| Diagnosis<br><input checked="" type="radio"/> Clinical<br><input type="radio"/> Final | R413 Amnesia NOS (23 June, 2018)<br>G441 Vascular headache, NEC (23 June, 2018)<br>R42 Dizziness (23 June, 2018)                                                               |
| History of Illness(Injury)                                                            |                                                                                                                                                                                |
| Physician's Finding and Statement                                                     | The patient visited June, 2018 with memory impairment to check up the brain MRI. There was multiple ischemic change and diffuse cortical atrophy on brain MRI. (23 June, 2018) |
| Remarks                                                                               |                                                                                                                                                                                |
| Issue Date                                                                            | 28/05/2019 (D/M/Y)                                                                                                                                                             |
| Name of Institution                                                                   | DOBONG HOSPITAL                                                                                                                                                                |
| Address                                                                               |                                                                                                                                                                                |
| Contact or FAX                                                                        |                                                                                                                                                                                |
| Department                                                                            |                                                                                                                                                                                |
| Licence NO                                                                            | 93782                                                                                                                                                                          |
| Doctor's Name                                                                         | KIM BO MI                                                                                                                                                                      |

## Medical Certificate

Chart No

Segno :

Social Security Number :

|                                                                                                                                                                                                                                                                                                                                    |                                                                                                                                                                                                                                                                                                                                                                                                                        |              |
|------------------------------------------------------------------------------------------------------------------------------------------------------------------------------------------------------------------------------------------------------------------------------------------------------------------------------------|------------------------------------------------------------------------------------------------------------------------------------------------------------------------------------------------------------------------------------------------------------------------------------------------------------------------------------------------------------------------------------------------------------------------|--------------|
| 1. Address                                                                                                                                                                                                                                                                                                                         | <div>Patient</div>                                                                                                                                                                                                                                                                                                                                                                                                     |              |
| 2. Name                                                                                                                                                                                                                                                                                                                            |                                                                                                                                                                                                                                                                                                                                                                                                                        |              |
| Gender                                                                                                                                                                                                                                                                                                                             |                                                                                                                                                                                                                                                                                                                                                                                                                        |              |
| 3. Diagnosis                                                                                                                                                                                                                                                                                                                       | ICD-10 Code                                                                                                                                                                                                                                                                                                                                                                                                            |              |
| ◆ Clinical                                                                                                                                                                                                                                                                                                                         | Dementia in Alzheimer's disease with late onset( G30.1†)                                                                                                                                                                                                                                                                                                                                                               | F001         |
| ◇ Finally                                                                                                                                                                                                                                                                                                                          | Other and unspecified primary hypertension<br>Heart failure, unspecified                                                                                                                                                                                                                                                                                                                                               | I109<br>I509 |
| 4. Dr's Opinion                                                                                                                                                                                                                                                                                                                    | <p>The patient visited December 2007 with recent memory disturbance. There were no abnormalities in the findings.</p> <p>On June 20, 2018, the patient presented with leg pain and memory impairment. On the test, MMSE 22/30, GDS 4 showed decrease in time, memory and calculation ability.</p> <p>On June 27, 2018, brain magnetic resonance imaging multiple lacunar infarction and cerebral cortical atrophy.</p> |              |
| <p>This is to certify that the above statements are true and correct.</p> <p>Date : 05-27-2019</p> <p><div></div></p> <p>Hospital Name : KYUNGHEE NEULFUREUN GERIATRIC HOSPITAL</p> <p>Hospital Tel : 02-903-9920      Hospital FAX : 02-903-9904</p> <p>License No. 52617</p> <p>Doctor's Name 이형길 Hyung-gil Lee<br/>E-mail :</p> |                                                                                                                                                                                                                                                                                                                                                                                                                        |              |
