# Supplementary material
Source: publisher figshare collection journal article supplement (https://karger.figshare.com/articles/dataset/_/11671407)
Supplement: Supplementary file 8 [file 1]

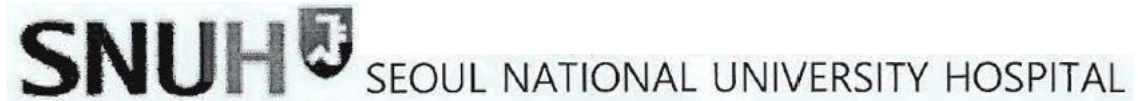

Date of issue: 2018-10-11

Regular Order >

(3) Seroxate 20mg tab(Paroxetine) 0.5 tab [P.O] daily + + X35 Days

(4) Aricept 10mg tab(Donepezil) 1 tab [P.O] daily hs Take a half a pill a day for the first two weeks X35 Days

Neuropsychological Test: Reservation

Writer: Kyung-min Lee

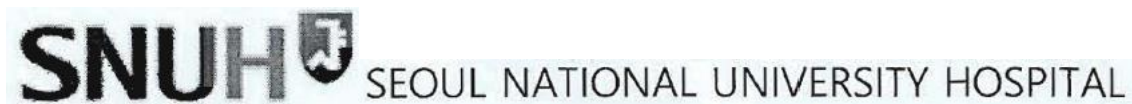

*progress Note* (Outpatient) (2018-12-20)

*Documenting* Department: Neurology

Primary Department: Neurology

## Remarks and Plans

### Remarks

1. memory, impairment ( impairment memory )

From five years before memory deterioration

4 months ago: daughter's TB stress

No strange behavior

Insurance Inspection      MMSE 22/30, CDR 1

==

Memory and attention disorders observed

MMSE 18

FAB 16

Patients randomly discontinue taking seroxate, donepezil

Currently taking amlodipine and ibuprofen

taking dapson-Taken to be associated with improved brain function

### Assessment & Plan

patient wants neuropsychological tests, again. (for comparison with previous neuropsychological tests)

Writer: Soh-hyun Ahn

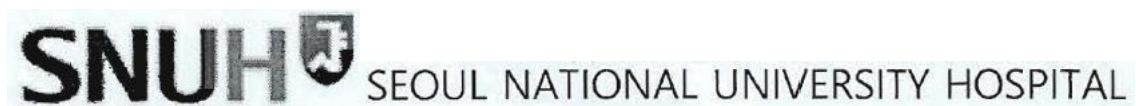

*progress Note* (Outpatient) (2019-01-18)

*Documenting* Department: Neurology

Primary Department: Neurology

## Remarks and Plans

### Remarks

MMSE 18, CDR 1, FAB 14/18  
Attention dysfunction

Better heart condition, Better condition

### Assessment & Plan

attention dysfunction

general medical condition

exercise  
cognitive training  
annual check-up

Treat psychiatry when depression occurs  
Visit a hospital if the condition worsens

Writer: Kyung-min Lee

등록번호 : ( )

환자명 : ( )

성별/나이 : ( )

작성일자 : 2018-10-11

정규 오더 &gt;

(3) Seroxate 20mg tab(Paroxetine) 0.5 tab [P.O] daily ++ X35 Days

(4) Aricept 10mg tab(Donepezil) 1 tab [P.O] daily hs 첫 이주일은 하루 반 알씩 복용 X35 Days

신경심리검사 : 예약

작성자 : 이경민 이경민

작성일자 : 2018-04-12

정규 오더 &gt;

(1) 보렘바이오Astrix 100mg cap(Aspirin enteric) 1 cap [P.O] daily ++ X24 Weeks

(2) Lodien 2.5mg tab(Amlodipine) 1 tab [P.O] daily ++ X24 Weeks

작성자 : 이해영 이해영

작성일자 : 2017-11-28

정규 오더 &gt;

(1) Entelon 150mg tab(vitis vinifera ext) 1 tab [P.O] bid pc X4 Months

(2) Celebrex 200mg cap(Celecoxib) 1 cap [P.O] daily pc X4 Months

(3) Lanston LFDT 15mg tab(Lansoprazole) 1 tab [P.O] daily ac X4 Months

RTC 4mon

Consult : TO : 피부과, 일반

작성자 : 서한길 서한길

Patient ID : ( )

Patient Name : ( )

Gender/Age : ( )

# HTN

이중훈 선생님 어머니

Plan

Medication

Ditto x

8 week

Documented by 이해영 이 해영

**Progress Note (Outpatient) (2019-01-18)**

**Documenting Department: 신경과**

**Primary Department: 신경과**

소견 및 계획

소견

MMSE 17/30, CDR 1, FAB 14/18

attention dysfunction

심장 상태 좋아지고 나아짐

Assessment & Plan

attention dysfunction

general medical condition

exercise

cog training

annual check-up

우울증 발생시 정신과

상태 악화시 내원할 것

Documented by 이경민 이 경민

**Progress Note (Outpatient) (2018-12-20)**

**Documenting Department: 신경과**

**Primary Department: 신경과**

소견 및 계획

소견

1. memory, impairment ( impairment memory )



Patient ID : ( )

Patient Name : ( )

Gender/Age : ( )

기억력 악화 5년전부터

살림 4개월전: 딸 결핵 스트레스

이상 행동 없다.

보험용검사: MMSE 22/30, CDR 1

===

NP

기억력 장애 및 주의력 장애가 관찰

MMSE 18

FAB 16

seroxate , donepezil 은 임의로 중단

현재는 amlodipine, ibuprofen

dapson 을 복용중 - brain 기능저하개선에 연관이 있을것으로 보호자 판단하에 임의로 복용

#### Assessment & Plan

NP 검사 원하심

Documented by 안소현 안소현

*Initial Note (Outpatient) (2018-10-11)*

*Documenting Department: 신경과*

*Primary Department: 신경과*

#### Chief Complaint

1. memory, impairment ( impairment memory )

통증평가

통증 유무 : 무

#### Present Illness

기억력 악화 5년전부터

살림 4개월전: 딸 결핵 스트레스

이상 행동 없다.

보험용검사: MMSE 22/30, CDR 1

#### Assessment

dementia

chronic stress

첨부한 사본은 의무기록 원본과 같음을 증명합니다.

Patient ID : ( ) Patient Name : ( ) Gender/Age : ( )  
depression

**Plan**

aricept  
seroxate

NP test in 1 m

Documented by 이경민 이경민

*Progress Note (Outpatient) (2018-04-12)*

*Documenting Department: 순환기내과*

*Primary Department: 순환기내과*

**소견 및 계획**

PI

Blood pressure  
Rt. SBP/DBP 136/80

Heart rate  
78 BPM

S & O

NOT ANEMIC ANICTERIC

RHB s M

CBS s R

Assessment & Plan

Assessment

# HTN

Plan

Medication

Ditto x

24 week

Documented by 이해영 이 해영

*Progress Note (Outpatient) (2017-11-28)*

*Documenting Department: 재활의학과*

*Primary Department: 재활의학과*

**소견**

F/U> Lumbar rad

첨부한 사본은 의무기록 원본과 같음을 증명합니다.
