# Supplementary material
Source: publisher figshare collection journal article supplement (https://karger.figshare.com/articles/dataset/_/11671407)
Supplement: Supplementary file 9 [file 1]

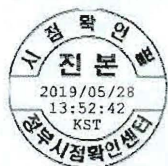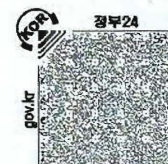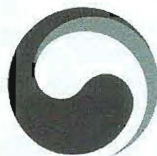

*Ministry of Health and Welfare*

## CERTIFICATE

This is to certify that the following person is licensed as a(an)

Pharmacist

in the Republic of Korea

Name in Full : [REDACTED]

Sex : [REDACTED]

Date of Birth : [REDACTED]

License Number : [REDACTED]

Date of Registration : Mar. 21, 1985

Date of Renewal : Dec. 31, 1990

Signature :

Minister of Health and Welfare  
Republic of Korea

Date: May. 28, 2019

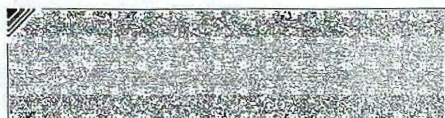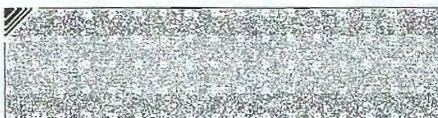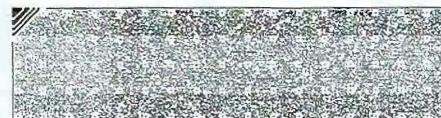

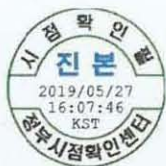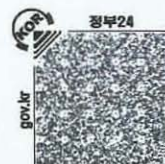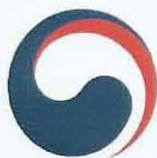

*Ministry of Health and Welfare*

**CERTIFICATE**

This is to certify that the following person is licensed as a(an)

Physician

in the Republic of Korea

Name in Full : [REDACTED]

Sex : [REDACTED]

Date of Birth : [REDACTED]

License Number : [REDACTED]

Date of Registration : Apr. 15, 1997

Date of Renewal : None

Signature :

Minister of Health and Welfare  
Republic of Korea

Date: May. 27, 2019

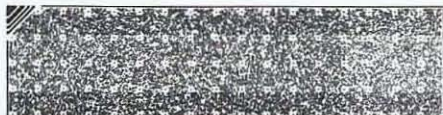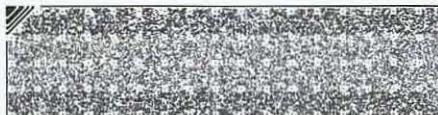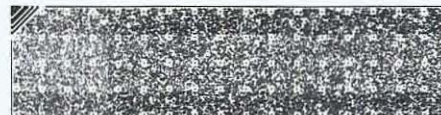

45-4 Deongneung-ro 28-gil, Mia-dong, G  
Newcore outlet, 51 Jamwon-ro, Banpo 3

Leave now

Send directions to your phone

10:20 AM–11:00 AM 40 min  
142  
10:22 AM from Suyu Traditional Market, Sungshin Women's Univ. Mia Campus  
9 min every 12 min  
DETAILS

10:15 AM–11:02 AM 47 min  
148 143 362 4318

10:15 AM–11:02 AM 47 min  
107 108 150 160 710 143

10:20 AM–10:59 AM 39 min  
141 143 362 4318

SCHEDULE EXPLORER

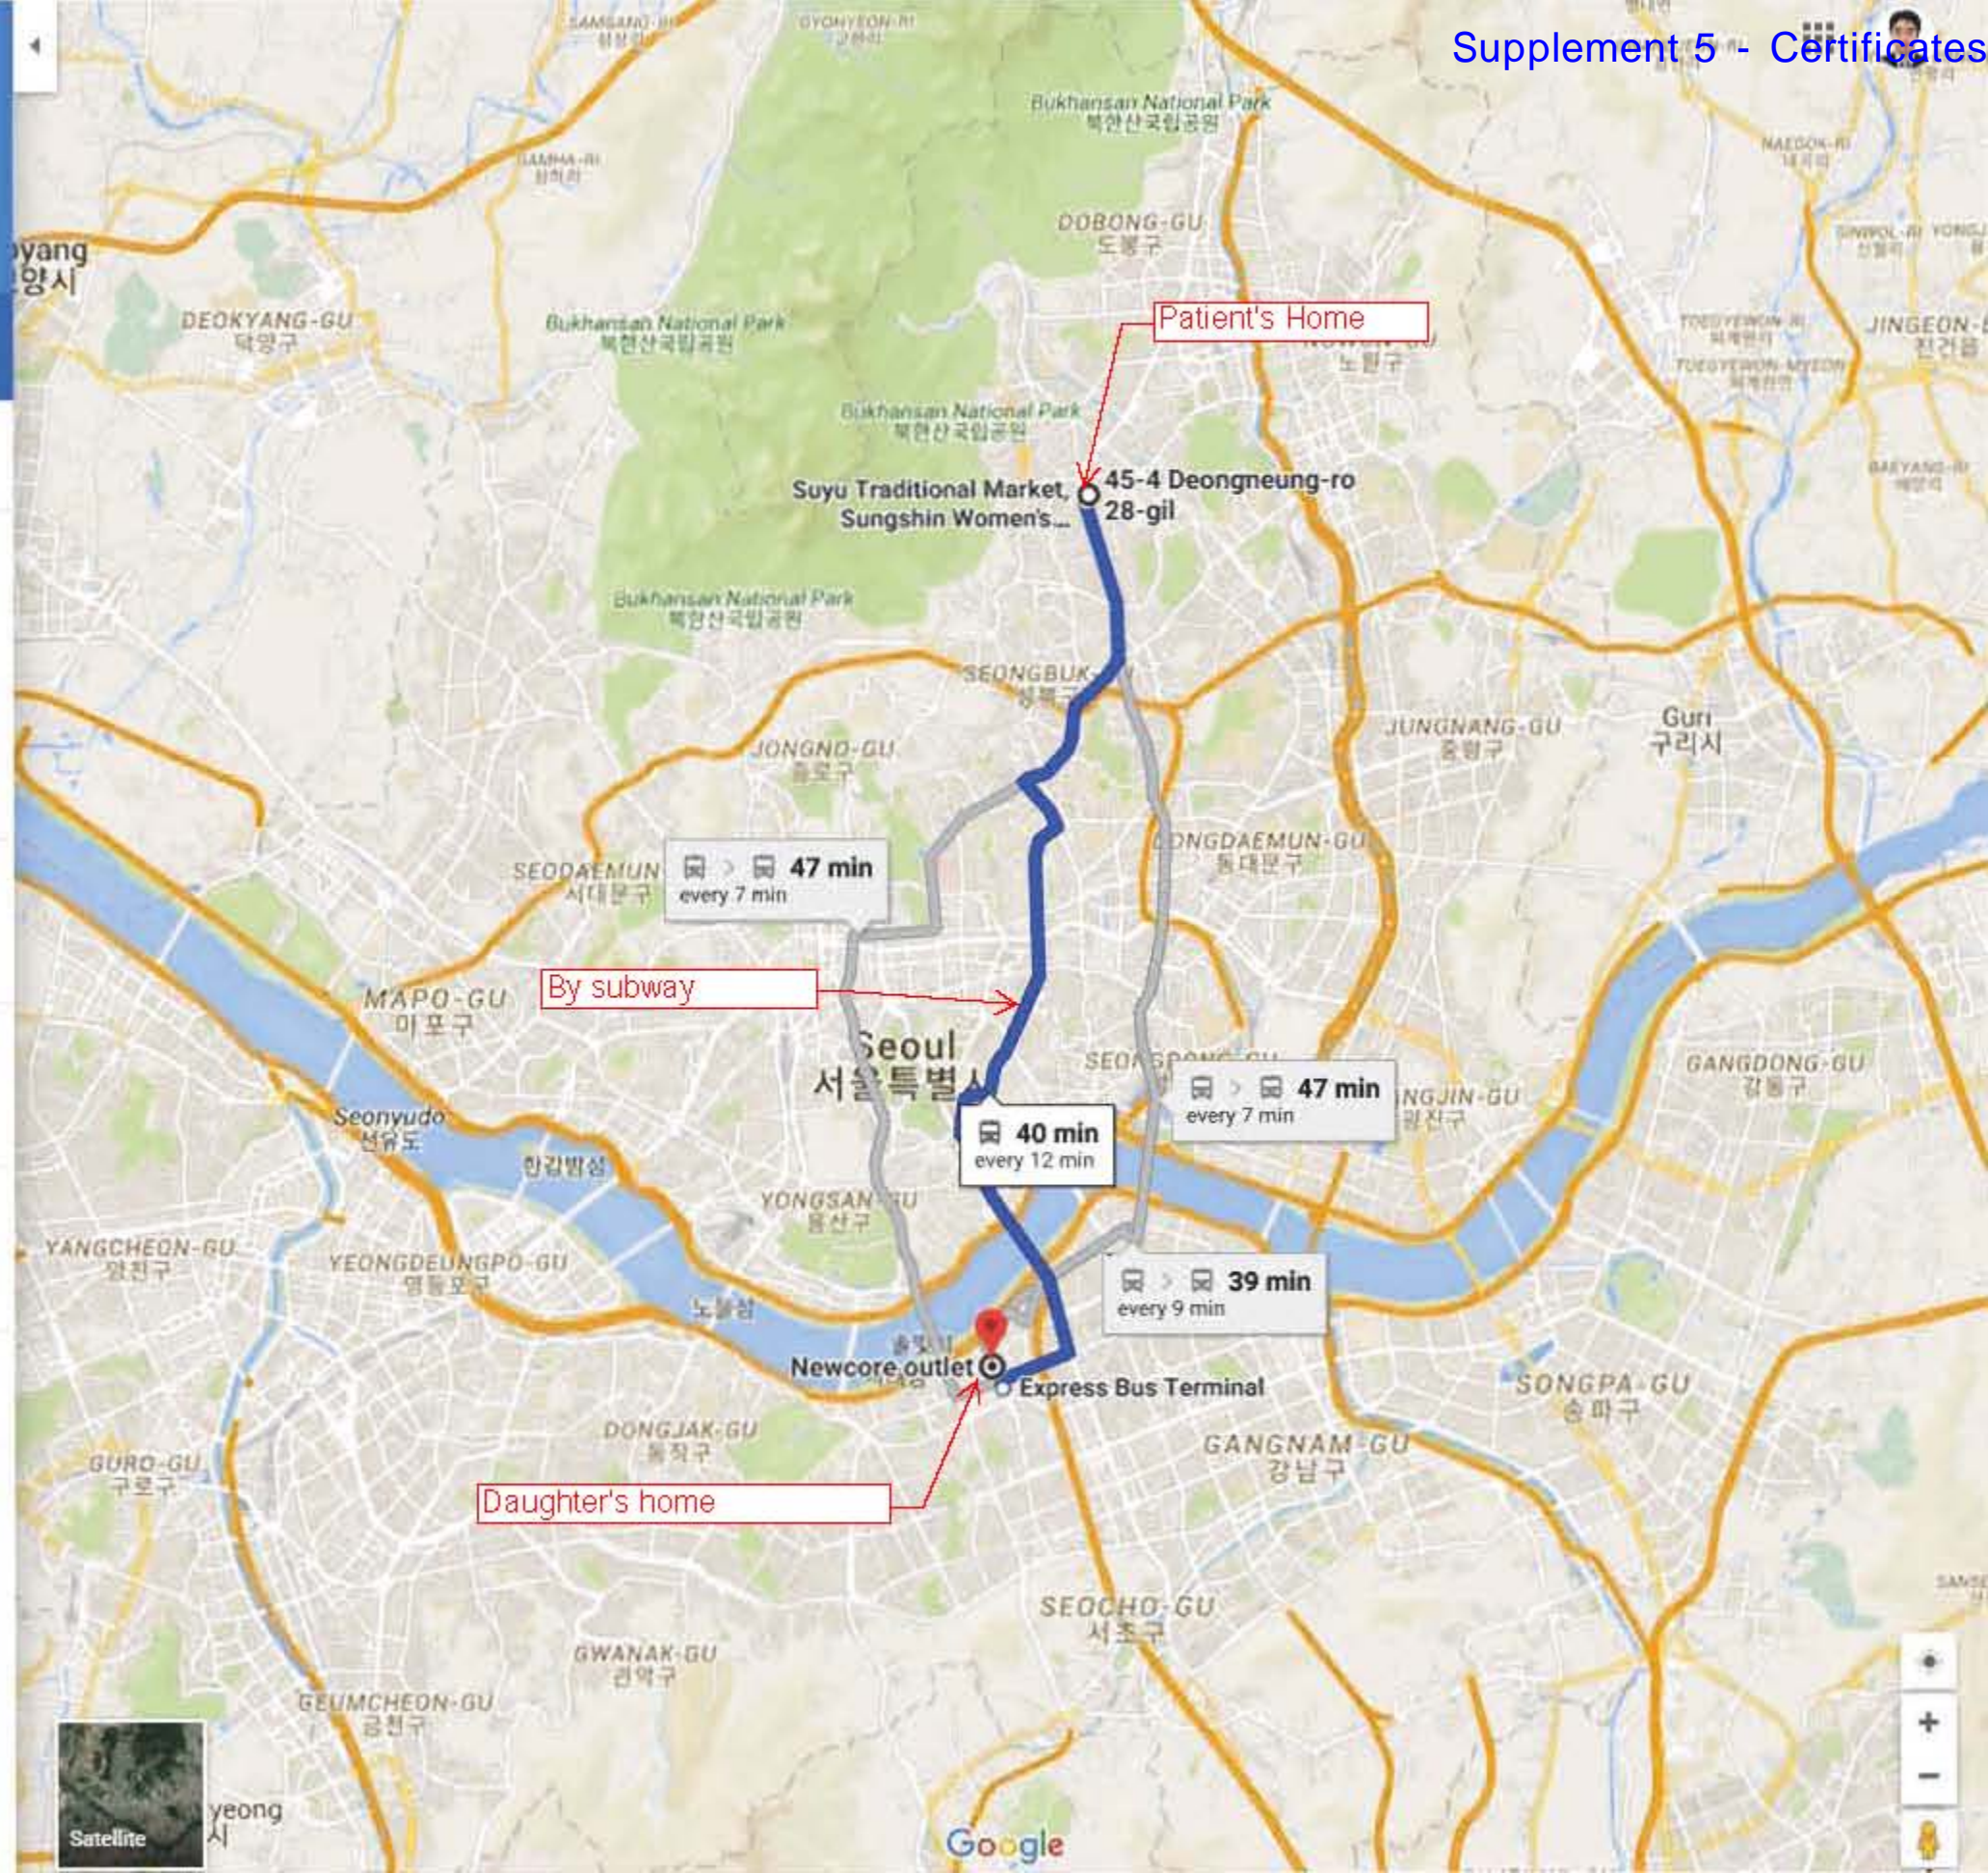

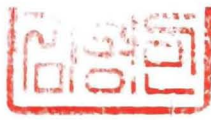

서울특별시 중구 퇴계로18길 22  
(남산동1가, 창영빌딩 2층 201호)  
[별지 제41호서식]

공증인 김형민사무소

(전화) 02-779-0482  
(팩스) 02-779-0484

Registered No. 2019 - 13682

# NOTARIAL CERTIFICATE

KIM HYUNG MIN NOTARY OFFICE

22, Toegye-ro 18-gil, Jung-gu, Seoul, Korea

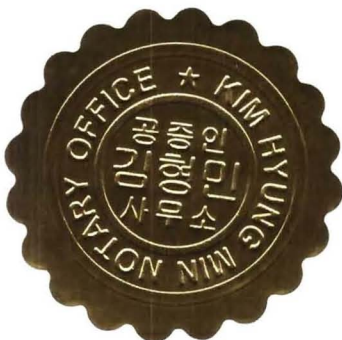

## Family Relation Certificate

|  |
|--|
|  |
|--|

| Classification | Name | Date of Birth | Resident ID | Sex | Family Origin |
|----------------|------|---------------|-------------|-----|---------------|
|                |      |               |             |     |               |

Patient

### Family Relationship

| Classification | Name             | Date of Birth | Resident ID | Sex    | Family Origin |
|----------------|------------------|---------------|-------------|--------|---------------|
| Father         | CHO, GWANG YOUNG |               |             | Male   |               |
| Mother         | SHIN, MONG GU    |               |             | Female |               |

|          |  |
|----------|--|
| Children |  |

Patient's daughter:  
Pharmacist

Patient's son:  
Physician

Patient's daughter

| Classification | Details                                                                                                                                                                                                                                                   |
|----------------|-----------------------------------------------------------------------------------------------------------------------------------------------------------------------------------------------------------------------------------------------------------|
| Correction     | <p>[on date] Dec. 11, 2009</p> <p>[Correction reason] Supreme Court Regulations for Registration of Family Relations No. 277</p> <p style="background-color: black; height: 40px;"></p> <p>[Processing office] Deokgwa-myeon, Namwon-si, Jeonrabuk-do</p> |

The Family Relation Certificate (Detailed) above certifies that it is no different from the records of the Family Relations Register.

May 13, 2019

Park, Gyeom Soo : The head of Gangbuk-gu, Seoul-si

This is the certificate (Detailed) that shows registered information stipulated by Article 15, Section 3 of [the Act on Family Relation Registration].

TIME OF ISSUE: 15:07

PERSON IN CHARGE: Lee, Tae Young

TEL: 02-3778-4064

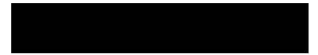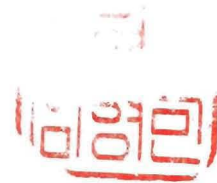

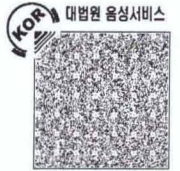

가족

## 가족관계증명서(상세)

|       |  |
|-------|--|
| 등록기준지 |  |
|-------|--|

| 구분 | 성명 | 출생연월일 | 주민등록번호 | 성별 | 본 |
|----|----|-------|--------|----|---|
| 본인 |    |       |        |    |   |

|      |
|------|
| 가족사항 |
|------|

| 구분 | 성명 | 출생연월일 | 주민등록번호 | 성별 | 본 |
|----|----|-------|--------|----|---|
| 부  |    |       |        |    |   |
| 모  |    |       |        |    |   |
| 자녀 |    |       |        |    |   |

| 구분 | 상세내용                                                                                   |
|----|----------------------------------------------------------------------------------------|
| 정정 | <p>[정정일] 2009년 12월 11일</p> <p>[정정사유] 대법원 가족관계등록예규 제277호</p> <p>[처리관서] 전라북도 남원시 덕과면</p> |

위 가족관계증명서(상세)는 가족관계등록부의 기록사항과 틀림없음을 증명합니다.

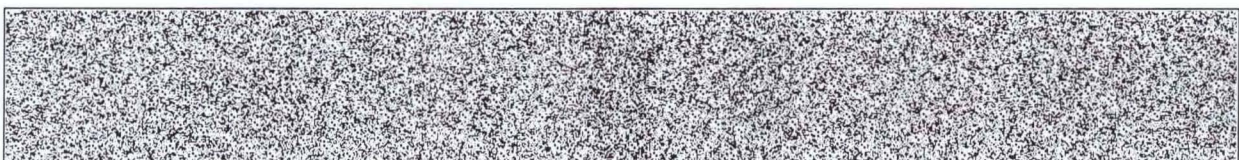

가족

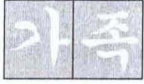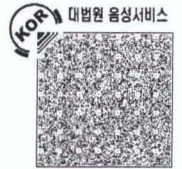

2019년 05월 13일

서울특별시 강북구청장 박겸수

※ 위 증명서는 「가족관계의 등록 등에 관한 법률」 제15조제3항에 따른 등록사항을 현출한 상세증명서입니다.

발급시각 : 15시 07분

발급담당자 : 이태영

☎ : 02-3778-4064

신청인 : 조 [REDACTED]

민원인

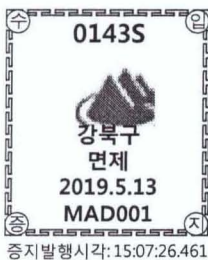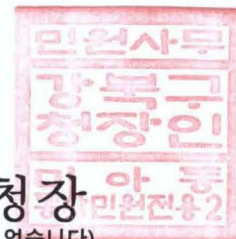

서울특별시 강북구청장

(수입증지가 인영이 되지 아니한 증명은 그 효력을 보증할 수 없습니다)

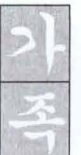

서울특별시 중구 퇴계로18길 22  
(남산동1가, 창영빌딩 2층 201호)  
[별지 제45호서식]

# 공증인 김형민사무소

(전화) 02-779-0482  
(팩스) 02-779-0484

위 번역문은 원문과 상위없음을 서약  
합니다.

2019년 05월 30일

서약인

김영중

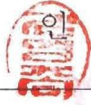

I swear that the attached translation is  
true to the original.

May 30, 2019

Signature

Kim, Y. J.

등부 2019 년 제 13682호

Registered No. 2019-13682

인 증

## Notarial Certificate

위 김 영 중-----은  
본 공증인의 면전에서 위 번역문이 원  
문과 상위없음을 확인하고 서명날인  
하였다.

KIM YOUNG JONG----- personally  
appeared before me, confirmed that  
the attached translation is true to the  
original and subscribed his(her) name.

2019년 05월 30일

이 사무소에서 위 인증한다.

This is hereby attested on this  
30th day of May 2019 at this office.

공증사무소 명칭

Name of the office

공증인 김형민사무소

**KIM HYUNG MIN NOTARY OFFICE**

소 속 서울중앙지방검찰청

Belong to Seoul Central

소재지표시

District Prosecutor's Office

서울특별시 중구 퇴계로18길 22

Address of the office

(남산동1가, 창영빌딩 2층 201호)

22, Toegye-ro 18-gil, Jung-gu, Seoul, Korea

김형민

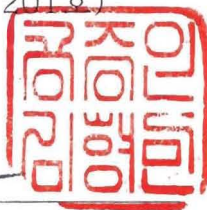

공증인

김 형 민

H. M. Kim

Signature of the Notary Public

**KIM HYUNG MIN**

본 사무소는 인가번호 제152호에 의거하여  
2018년 09월 27일 법무부 장관으로부터  
공증인 업무를 행할 것을 인가 받았다.

This office has been authorized by the  
Minister of Justice, the Republic of  
Korea, to act as Notary Public Since  
27, Sep. 2018 Under Law No.152.
